# Supplementary material for: LimoRhyde: A Flexible Approach for Differential Analysis of Rhythmic Transcriptome Data
Source: J Biol Rhythms. 2018 Nov 25;34(1):5–18. doi: 10.1177/0748730418813785 (PMC6376636; doi:10.1177/0748730418813785)
Supplement: Table_S4 – Supplemental material for LimoRhyde: A Flexible Approach for Differential Analysis of Rhythmic Transcriptome Data [file Table_S4.csv]

NGenes	Direction	PValue	FDR	GeneSet
46	Down	6.78E-13	3.73E-09	GO_IONOTROPIC_GLUTAMATE_RECEPTOR_COMPLEX
105	Down	1.21E-12	3.73E-09	GO_INNER_MITOCHONDRIAL_MEMBRANE_PROTEIN_COMPLEX
135	Down	2.53E-11	4.61E-08	GO_MITOCHONDRIAL_PROTEIN_COMPLEX
172	Down	3.52E-11	4.61E-08	GO_MITOCHONDRIAL_MEMBRANE_PART
78	Down	3.74E-11	4.61E-08	GO_RESPIRATORY_CHAIN
230	Down	7.28E-11	6.87E-08	GO_REGULATION_OF_SYNAPSE_STRUCTURE_OR_ACTIVITY
41	Down	7.80E-11	6.87E-08	GO_GLUTAMATE_RECEPTOR_SIGNALING_PATHWAY
21	Down	9.31E-11	7.18E-08	GO_POSITIVE_REGULATION_OF_EXCITATORY_POSTSYNAPTIC_POTENTIAL
259	Down	1.53E-10	1.05E-07	GO_SYNAPTIC_MEMBRANE
138	Down	2.94E-10	1.81E-07	GO_REGULATION_OF_SYNAPTIC_PLASTICITY
16	Down	5.80E-10	3.25E-07	GO_PROTEIN_LOCALIZATION_TO_SYNAPSE
107	Down	1.01E-09	5.20E-07	GO_MITOCHONDRIAL_TRANSLATION
130	Down	1.18E-09	5.35E-07	GO_LEARNING
73	Down	1.21E-09	5.35E-07	GO_MITOCHONDRIAL_RESPIRATORY_CHAIN_COMPLEX_ASSEMBLY
82	Down	1.31E-09	5.37E-07	GO_OXIDATIVE_PHOSPHORYLATION
92	Down	1.81E-09	6.96E-07	GO_TRANSLATIONAL_TERMINATION
421	Down	1.93E-09	7.00E-07	GO_SYNAPTIC_SIGNALING
55	Down	2.23E-09	7.65E-07	GO_PRESYNAPTIC_MEMBRANE
204	Down	2.38E-09	7.71E-07	GO_POSTSYNAPTIC_MEMBRANE
42	Down	2.65E-09	7.77E-07	GO_NADH_DEHYDROGENASE_COMPLEX
41	Down	2.65E-09	7.77E-07	GO_MITOCHONDRIAL_ELECTRON_TRANSPORT_NADH_TO_UBIQUINONE
26	Down	3.16E-09	8.79E-07	GO_AMPA_GLUTAMATE_RECEPTOR_COMPLEX
61	Down	3.55E-09	8.79E-07	GO_POSITIVE_REGULATION_OF_SYNAPSE_ASSEMBLY
56	Down	3.71E-09	8.79E-07	GO_MITOCHONDRIAL_RESPIRATORY_CHAIN_COMPLEX_I_BIOGENESIS
56	Down	3.71E-09	8.79E-07	GO_MITOCHONDRIAL_RESPIRATORY_CHAIN_COMPLEX_I_ASSEMBLY
56	Down	3.71E-09	8.79E-07	GO_NADH_DEHYDROGENASE_COMPLEX_ASSEMBLY
606	Down	5.03E-09	1.15E-06	GO_SYNAPSE_PART
19	Down	6.77E-09	1.49E-06	GO_REGULATION_OF_ALPHA_AMINO_3_HYDROXY_5_METHYL_4_ISOXAZOLE_PROPIONATE_SELECTIVE_GLUTAMATE_RECEPTOR_ACTIVITY
27	Down	8.86E-09	1.88E-06	GO_GLUTAMATE_RECEPTOR_ACTIVITY
109	Down	9.65E-09	1.97E-06	GO_TRANSLATIONAL_ELONGATION
120	Down	1.03E-08	1.97E-06	GO_NEURON_SPINE
20	Down	1.05E-08	1.97E-06	GO_EXTRACELLULAR_GLUTAMATE_GATED_ION_CHANNEL_ACTIVITY
297	Down	1.06E-08	1.97E-06	GO_MODULATION_OF_SYNAPTIC_TRANSMISSION
376	Down	1.16E-08	2.10E-06	GO_POSTSYNAPSE
145	Down	1.19E-08	2.10E-06	GO_SYNAPSE_ORGANIZATION
37	Down	1.34E-08	2.30E-06	GO_NADH_DEHYDROGENASE_ACTIVITY
30	Down	1.97E-08	3.29E-06	GO_MODULATION_OF_EXCITATORY_POSTSYNAPTIC_POTENTIAL
72	Down	2.52E-08	4.08E-06	GO_ORGANELLAR_RIBOSOME
19	Down	2.99E-08	4.60E-06	GO_CEREBRAL_CORTEX_RADIAL_GLIA_GUIDED_MIGRATION
19	Down	2.99E-08	4.60E-06	GO_TELENCEPHALON_GLIAL_CELL_MIGRATION
749	Down	3.28E-08	4.82E-06	GO_SYNAPSE
79	Down	3.29E-08	4.82E-06	GO_REGULATION_OF_SYNAPSE_ASSEMBLY
48	Down	4.50E-08	6.45E-06	GO_REGULATION_OF_NEURONAL_SYNAPTIC_PLASTICITY
26	Down	5.18E-08	7.25E-06	GO_TRANSMITTER_GATED_CHANNEL_ACTIVITY
16	Down	5.51E-08	7.55E-06	GO_NEURON_CELL_CELL_ADHESION
92	Down	7.14E-08	9.57E-06	GO_ELECTRON_TRANSPORT_CHAIN
282	Down	8.13E-08	1.07E-05	GO_PRESYNAPSE
197	Down	9.47E-08	1.20E-05	GO_EXCITATORY_SYNAPSE
113	Down	9.50E-08	1.20E-05	GO_REGULATION_OF_SYNAPSE_ORGANIZATION
31	Down	1.85E-07	2.28E-05	GO_REGULATION_OF_SYNAPTIC_VESICLE_TRANSPORT
37	Down	1.95E-07	2.35E-05	GO_DENDRITIC_SHAFT
54	Down	1.98E-07	2.35E-05	GO_REGULATION_OF_DENDRITIC_SPINE_DEVELOPMENT
248	Down	2.42E-07	2.81E-05	GO_COGNITION
28	Down	2.64E-07	3.01E-05	GO_CEREBRAL_CORTEX_RADIALLY_ORIENTED_CELL_MIGRATION
55	Down	2.90E-07	3.26E-05	GO_MITOCHONDRIAL_TRANSMEMBRANE_TRANSPORT
30	Down	3.43E-07	3.78E-05	GO_REGULATION_OF_NEUROTRANSMITTER_RECEPTOR_ACTIVITY
109	Down	4.14E-07	4.48E-05	GO_POSITIVE_REGULATION_OF_SYNAPTIC_TRANSMISSION
69	Down	4.66E-07	4.95E-05	GO_PROTEIN_LOCALIZATION_TO_MITOCHONDRION
448	Down	5.48E-07	5.67E-05	GO_DENDRITE
24	Down	5.52E-07	5.67E-05	GO_REGULATION_OF_LONG_TERM_NEURONAL_SYNAPTIC_PLASTICITY
51	Down	5.69E-07	5.75E-05	GO_PROTEIN_TARGETING_TO_MITOCHONDRION
18	Down	8.45E-07	7.78E-05	GO_ACETYLCHOLINE_RECEPTOR_SIGNALING_PATHWAY
18	Down	8.45E-07	7.78E-05	GO_SIGNAL_TRANSDUCTION_INVOLVED_IN_CELLULAR_RESPONSE_TO_AMMONIUM_ION
18	Down	8.45E-07	7.78E-05	GO_CELLULAR_RESPONSE_TO_ACETYLCHOLINE
18	Down	8.45E-07	7.78E-05	GO_G_PROTEIN_COUPLED_ACETYLCHOLINE_RECEPTOR_SIGNALING_PATHWAY
18	Down	8.45E-07	7.78E-05	GO_RESPONSE_TO_ACETYLCHOLINE
18	Down	8.45E-07	7.78E-05	GO_POSTSYNAPTIC_SIGNAL_TRANSDUCTION
69	Down	9.42E-07	8.54E-05	GO_SYNAPSE_ASSEMBLY
34	Down	9.57E-07	8.55E-05	GO_POSITIVE_REGULATION_OF_DENDRITIC_SPINE_DEVELOPMENT
141	Down	1.02E-06	9.01E-05	GO_CELLULAR_RESPIRATION
91	Down	1.11E-06	9.60E-05	GO_OXIDOREDUCTASE_COMPLEX
122	Down	1.15E-06	9.82E-05	GO_CELLULAR_PROTEIN_COMPLEX_DISASSEMBLY
97	Down	1.24E-06	1.04E-04	GO_MEMORY
25	Down	1.27E-06	1.06E-04	GO_ORGANELLAR_SMALL_RIBOSOMAL_SUBUNIT
30	Down	1.42E-06	1.17E-04	GO_REGULATION_OF_DENDRITIC_SPINE_MORPHOGENESIS
49	Down	1.48E-06	1.19E-04	GO_REGULATION_OF_SYNAPTIC_TRANSMISSION_GLUTAMATERGIC
63	Down	1.48E-06	1.19E-04	GO_POSITIVE_REGULATION_OF_DENDRITE_DEVELOPMENT
37	Down	1.63E-06	1.29E-04	GO_GLUTAMATE_RECEPTOR_BINDING
19	Down	1.71E-06	1.34E-04	GO_DENDRITIC_SPINE_DEVELOPMENT
53	Down	1.94E-06	1.49E-04	GO_NEURONAL_POSTSYNAPTIC_DENSITY
56	Down	2.33E-06	1.77E-04	GO_NEURON_NEURON_SYNAPTIC_TRANSMISSION
39	Down	2.46E-06	1.85E-04	GO_LONG_TERM_SYNAPTIC_POTENTIATION
42	Down	2.57E-06	1.91E-04	GO_CEREBRAL_CORTEX_CELL_MIGRATION
415	Down	2.63E-06	1.93E-04	GO_AXON
643	Down	3.06E-06	2.22E-04	GO_SOMATODENDRITIC_COMPARTMENT
25	Down	3.20E-06	2.29E-04	GO_STARTLE_RESPONSE
24	Down	3.40E-06	2.41E-04	GO_IONOTROPIC_GLUTAMATE_RECEPTOR_SIGNALING_PATHWAY
13	Down	3.83E-06	2.68E-04	GO_G_PROTEIN_COUPLED_GLUTAMATE_RECEPTOR_SIGNALING_PATHWAY
934	Down	3.88E-06	2.69E-04	GO_NEURON_PROJECTION
61	Down	4.22E-06	2.89E-04	GO_FOREBRAIN_CELL_MIGRATION
67	Down	4.89E-06	3.31E-04	GO_NEUROTRANSMITTER_RECEPTOR_ACTIVITY
218	Down	4.94E-06	3.31E-04	GO_AXON_PART
29	Down	5.08E-06	3.37E-04	GO_PRESYNAPTIC_ACTIVE_ZONE
51	Down	5.55E-06	3.64E-04	GO_OXIDOREDUCTASE_ACTIVITY_ACTING_ON_NAD_P_H_QUINONE_OR_SIMILAR_COMPOUND_AS_ACCEPTOR
19	Down	6.07E-06	3.90E-04	GO_POSITIVE_REGULATION_OF_DENDRITE_EXTENSION
19	Down	6.07E-06	3.90E-04	GO_REGULATION_OF_DENDRITE_EXTENSION
22	Down	6.52E-06	4.11E-04	GO_SYNAPTIC_TRANSMISSION_GLUTAMATERGIC
14	Down	6.53E-06	4.11E-04	GO_VOCALIZATION_BEHAVIOR
51	Down	7.41E-06	4.61E-04	GO_REGULATION_OF_NEUROTRANSMITTER_SECRETION
12	Down	7.75E-06	4.78E-04	GO_MECHANOSENSORY_BEHAVIOR
14	Down	8.34E-06	5.09E-04	GO_LAYER_FORMATION_IN_CEREBRAL_CORTEX
61	Down	9.77E-06	5.91E-04	GO_NEGATIVE_REGULATION_OF_SYNAPTIC_TRANSMISSION
198	Down	1.04E-05	6.23E-04	GO_STRUCTURAL_CONSTITUENT_OF_RIBOSOME
72	Down	1.08E-05	6.40E-04	GO_ASSOCIATIVE_LEARNING
28	Down	1.17E-05	6.87E-04	GO_LONG_TERM_MEMORY
211	Down	1.18E-05	6.88E-04	GO_RIBOSOME
25	Up	1.21E-05	6.97E-04	GO_MHC_PROTEIN_COMPLEX
106	Down	1.24E-05	7.09E-04	GO_PERIKARYON
142	Down	1.30E-05	7.38E-04	GO_EXOCYTIC_VESICLE
148	Down	1.41E-05	7.88E-04	GO_RIBOSOMAL_SUBUNIT
39	Down	1.61E-05	8.94E-04	GO_REGULATION_OF_FILOPODIUM_ASSEMBLY
48	Down	1.80E-05	9.89E-04	GO_PHOSPHATASE_COMPLEX
129	Down	1.85E-05	0.001010541	GO_NEURON_PROJECTION_TERMINUS
15	Down	2.13E-05	0.001152805	GO_REGULATION_OF_N_METHYL_D_ASPARTATE_SELECTIVE_GLUTAMATE_RECEPTOR_ACTIVITY
33	Down	2.18E-05	0.001167568	GO_NEURON_RECOGNITION
51	Down	2.21E-05	0.00117374	GO_INTRINSIC_COMPONENT_OF_MITOCHONDRIAL_MEMBRANE
23	Down	2.51E-05	0.001323825	GO_IONOTROPIC_GLUTAMATE_RECEPTOR_BINDING
64	Down	2.61E-05	0.001362058	GO_REGULATION_OF_NEUROTRANSMITTER_TRANSPORT
20	Down	2.73E-05	0.001416128	GO_NEURONAL_CELL_BODY_MEMBRANE
54	Down	2.83E-05	0.001455005	GO_EXCITATORY_EXTRACELLULAR_LIGAND_GATED_ION_CHANNEL_ACTIVITY
19	Down	2.95E-05	0.001493117	GO_REGULATION_OF_LONG_TERM_SYNAPTIC_POTENTIATION
22	Down	2.95E-05	0.001493117	GO_REGULATION_OF_DOPAMINE_SECRETION
14	Down	2.98E-05	0.001495338	GO_POSITIVE_REGULATION_OF_DENDRITIC_SPINE_MORPHOGENESIS
22	Down	3.03E-05	0.001508137	GO_PROTON_TRANSPORTING_ATP_SYNTHASE_COMPLEX
1247	Down	3.21E-05	0.001574099	GO_NEURON_PART
585	Down	3.23E-05	0.001574099	GO_MITOCHONDRION_ORGANIZATION
42	Down	3.24E-05	0.001574099	GO_REGULATION_OF_CATECHOLAMINE_SECRETION
85	Down	3.48E-05	0.001676649	GO_EPHRIN_RECEPTOR_SIGNALING_PATHWAY
120	Down	3.53E-05	0.00168769	GO_LOCALIZATION_WITHIN_MEMBRANE
382	Down	3.56E-05	0.00168769	GO_SINGLE_ORGANISM_BEHAVIOR
516	Down	3.60E-05	0.001692504	GO_ORGANELLE_INNER_MEMBRANE
24	Down	3.74E-05	0.001748309	GO_REGULATION_OF_PROTEIN_PHOSPHATASE_TYPE_2A_ACTIVITY
60	Down	4.00E-05	0.001856244	GO_REGULATION_OF_PHOSPHOPROTEIN_PHOSPHATASE_ACTIVITY
11	Up	4.14E-05	0.001904332	GO_RAGE_RECEPTOR_BINDING
44	Down	4.29E-05	0.001958605	GO_HETEROPHILIC_CELL_CELL_ADHESION_VIA_PLASMA_MEMBRANE_CELL_ADHESION_MOLECULES
11	Down	4.35E-05	0.001958605	GO_POSITIVE_REGULATION_OF_SYNAPSE_MATURATION
75	Up	4.37E-05	0.001958605	GO_GLIAL_CELL_DEVELOPMENT
11	Down	4.38E-05	0.001958605	GO_ARP2_3_PROTEIN_COMPLEX
17	Down	4.65E-05	0.002064384	GO_MITOCHONDRIAL_ATP_SYNTHESIS_COUPLED_PROTON_TRANSPORT
489	Down	4.77E-05	0.002099518	GO_CELL_BODY
41	Up	4.90E-05	0.002143393	GO_CELL_SUBSTRATE_JUNCTION_ASSEMBLY
20	Down	5.05E-05	0.002192688	GO_PROTEIN_PHOSPHATASE_TYPE_2A_COMPLEX
20	Down	5.09E-05	0.002193396	GO_AXONAL_GROWTH_CONE
75	Down	5.68E-05	0.002434112	GO_MULTI_ORGANISM_BEHAVIOR
118	Down	5.76E-05	0.002447969	GO_REGULATION_OF_DENDRITE_DEVELOPMENT
32	Down	5.83E-05	0.002463995	GO_POSITIVE_REGULATION_OF_DENDRITE_MORPHOGENESIS
149	Down	6.54E-05	0.002741893	GO_SITE_OF_POLARIZED_GROWTH
14	Up	7.02E-05	0.002922802	GO_MHC_CLASS_II_PROTEIN_COMPLEX
26	Down	7.79E-05	0.003225692	GO_INACTIVATION_OF_MAPK_ACTIVITY
21	Down	8.33E-05	0.003422335	GO_REGULATION_OF_SYNAPTIC_VESICLE_EXOCYTOSIS
56	Down	8.76E-05	0.003576982	GO_EXOCYTIC_VESICLE_MEMBRANE
88	Down	8.91E-05	0.003615634	GO_POTASSIUM_CHANNEL_COMPLEX
182	Down	9.63E-05	0.003882221	GO_MACROMOLECULAR_COMPLEX_DISASSEMBLY
22	Down	9.99E-05	0.003973166	GO_INTRINSIC_COMPONENT_OF_MITOCHONDRIAL_INNER_MEMBRANE
73	Down	9.99E-05	0.003973166	GO_EXTRACELLULAR_LIGAND_GATED_ION_CHANNEL_ACTIVITY
17	Down	1.01E-04	0.003973166	GO_DENDRITIC_SPINE_ORGANIZATION
27	Down	1.18E-04	0.004638268	GO_POSITIVE_REGULATION_OF_FILOPODIUM_ASSEMBLY
13	Down	1.29E-04	0.004997851	GO_MITOCHONDRIAL_ELECTRON_TRANSPORT_UBIQUINOL_TO_CYTOCHROME_C
79	Down	1.29E-04	0.004997851	GO_DENDRITE_DEVELOPMENT
26	Down	1.34E-04	0.005170207	GO_POSITIVE_REGULATION_OF_CALCIUM_ION_DEPENDENT_EXOCYTOSIS
21	Down	1.37E-04	0.005238974	GO_PROTEIN_PHOSPHATASE_TYPE_2A_REGULATOR_ACTIVITY
75	Down	1.38E-04	0.005256555	GO_ANAPHASE_PROMOTING_COMPLEX_DEPENDENT_CATABOLIC_PROCESS
74	Down	1.56E-04	0.005885904	GO_REGULATION_OF_DENDRITE_MORPHOGENESIS
11	Down	1.57E-04	0.005921601	GO_LOCOMOTORY_EXPLORATION_BEHAVIOR
675	Down	1.63E-04	0.006078161	GO_MITOCHONDRIAL_ENVELOPE
65	Down	1.75E-04	0.006491679	GO_REGULATION_OF_CELLULAR_AMINO_ACID_METABOLIC_PROCESS
116	Up	1.84E-04	0.006779257	GO_CELL_MATRIX_ADHESION
32	Down	1.94E-04	0.007129009	GO_ORGANELLAR_LARGE_RIBOSOMAL_SUBUNIT
41	Down	2.02E-04	0.0073721	GO_RECEPTOR_CLUSTERING
114	Down	2.11E-04	0.007667271	GO_PRESYNAPTIC_PROCESS_INVOLVED_IN_SYNAPTIC_TRANSMISSION
17	Down	2.18E-04	0.007860595	GO_TRANSMEMBRANE_RECEPTOR_PROTEIN_PHOSPHATASE_ACTIVITY
87	Down	2.25E-04	0.008076757	GO_LARGE_RIBOSOMAL_SUBUNIT
215	Down	2.28E-04	0.008108527	GO_ENERGY_DERIVATION_BY_OXIDATION_OF_ORGANIC_COMPOUNDS
71	Down	2.31E-04	0.008186707	GO_REGULATION_OF_AMINE_TRANSPORT
512	Down	2.41E-04	0.008490465	GO_BEHAVIOR
269	Down	2.42E-04	0.008492381	GO_PROTEASOMAL_PROTEIN_CATABOLIC_PROCESS
36	Down	2.46E-04	0.008578965	GO_CALCIUM_CHANNEL_REGULATOR_ACTIVITY
48	Down	2.50E-04	0.008629162	GO_TRANSLATION_INITIATION_FACTOR_ACTIVITY
87	Down	2.51E-04	0.008629162	GO_REGULATION_OF_CELLULAR_AMINE_METABOLIC_PROCESS
25	Down	2.88E-04	0.009838003	GO_POSTSYNAPTIC_MEMBRANE_ORGANIZATION
61	Down	2.89E-04	0.009838003	GO_SMALL_RIBOSOMAL_SUBUNIT
12	Down	2.91E-04	0.00987119	GO_PREPULSE_INHIBITION
23	Down	3.01E-04	0.010129665	GO_HEPARAN_SULFATE_PROTEOGLYCAN_BIOSYNTHETIC_PROCESS
18	Down	3.14E-04	0.010465624	GO_DNA_DIRECTED_RNA_POLYMERASE_III_COMPLEX
18	Down	3.14E-04	0.010465624	GO_RNA_POLYMERASE_III_ACTIVITY
71	Down	3.25E-04	0.010762691	GO_TRANSCRIPTION_COUPLED_NUCLEOTIDE_EXCISION_REPAIR
230	Down	3.35E-04	0.011033483	GO_POSITIVE_REGULATION_OF_NEURON_PROJECTION_DEVELOPMENT
220	Down	3.37E-04	0.011052739	GO_VESICLE_LOCALIZATION
105	Down	3.41E-04	0.011128892	GO_HYDROGEN_ION_TRANSMEMBRANE_TRANSPORT
24	Down	3.50E-04	0.011296425	GO_ATP_SYNTHESIS_COUPLED_PROTON_TRANSPORT
24	Down	3.50E-04	0.011296425	GO_ENERGY_COUPLED_PROTON_TRANSPORT_DOWN_ELECTROCHEMICAL_GRADIENT
27	Down	3.67E-04	0.011778124	GO_UBIQUITIN_LIKE_PROTEIN_CONJUGATING_ENZYME_ACTIVITY
14	Down	3.69E-04	0.011779262	GO_POSITIVE_REGULATION_OF_LONG_TERM_SYNAPTIC_POTENTIATION
318	Down	3.71E-04	0.011779262	GO_TRANSPORTER_COMPLEX
51	Down	3.74E-04	0.011834846	GO_RESPONSE_TO_AMMONIUM_ION
70	Down	3.86E-04	0.012095531	GO_CELL_SURFACE_RECEPTOR_SIGNALING_PATHWAY_INVOLVED_IN_CELL_CELL_SIGNALING
15	Down	3.88E-04	0.012095531	GO_REGULATION_OF_TELOMERASE_RNA_LOCALIZATION_TO_CAJAL_BODY
15	Down	3.88E-04	0.012095531	GO_POSITIVE_REGULATION_OF_TELOMERASE_RNA_LOCALIZATION_TO_CAJAL_BODY
12	Down	4.09E-04	0.012627686	GO_BEHAVIORAL_RESPONSE_TO_COCAINE
14	Down	4.10E-04	0.012627686	GO_PROTEIN_IMPORT_INTO_MITOCHONDRIAL_MATRIX
20	Down	4.14E-04	0.012708579	GO_N_GLYCAN_PROCESSING
14	Down	4.45E-04	0.013595477	GO_GLYCINE_BINDING
482	Down	4.54E-04	0.013778595	GO_AMIDE_BIOSYNTHETIC_PROCESS
365	Down	4.59E-04	0.013872102	GO_CELL_MORPHOGENESIS_INVOLVED_IN_NEURON_DIFFERENTIATION
26	Up	4.64E-04	0.013957804	GO_MESODERMAL_CELL_DIFFERENTIATION
24	Down	4.71E-04	0.01410534	GO_EXPLORATION_BEHAVIOR
69	Down	4.85E-04	0.014453041	GO_REGULATION_OF_ADENYLATE_CYCLASE_ACTIVITY
47	Down	5.04E-04	0.014877565	GO_PROTON_TRANSPORTING_TWO_SECTOR_ATPASE_COMPLEX
174	Down	5.04E-04	0.014877565	GO_MITOCHONDRIAL_TRANSPORT
16	Down	5.11E-04	0.01501535	GO_NEGATIVE_REGULATION_OF_CATECHOLAMINE_SECRETION
933	Down	5.45E-04	0.015933411	GO_MITOCHONDRIAL_PART
75	Down	5.49E-04	0.015969504	GO_PROTEASOME_COMPLEX
20	Down	5.72E-04	0.016569353	GO_AXONAL_FASCICULATION
82	Up	5.91E-04	0.017021119	GO_INTEGRIN_MEDIATED_SIGNALING_PATHWAY
14	Up	6.12E-04	0.017559992	GO_LINOLEIC_ACID_METABOLIC_PROCESS
106	Down	6.24E-04	0.017803331	GO_POSITIVE_REGULATION_OF_LIGASE_ACTIVITY
17	Down	6.27E-04	0.017816625	GO_SYNAPTIC_TRANSMISSION_DOPAMINERGIC
82	Down	6.31E-04	0.017857377	GO_REGULATION_OF_CALCIUM_ION_DEPENDENT_EXOCYTOSIS
127	Down	6.38E-04	0.017970288	GO_REGULATION_OF_PHOSPHATASE_ACTIVITY
400	Down	6.59E-04	0.018472666	GO_NEURON_PROJECTION_MORPHOGENESIS
165	Down	6.67E-04	0.018605652	GO_CATION_CHANNEL_COMPLEX
12	Down	7.03E-04	0.019533631	GO_CLATHRIN_SCULPTED_VESICLE
101	Down	7.26E-04	0.020081427	GO_HYDROGEN_ION_TRANSMEMBRANE_TRANSPORTER_ACTIVITY
85	Down	7.65E-04	0.021046181	GO_REGULATION_OF_LYASE_ACTIVITY
48	Down	8.01E-04	0.0219375	GO_ACETYLGLUCOSAMINYLTRANSFERASE_ACTIVITY
27	Down	8.07E-04	0.022012918	GO_MOTOR_NEURON_AXON_GUIDANCE
160	Up	8.14E-04	0.02209929	GO_CELL_SUBSTRATE_ADHESION
27	Up	8.35E-04	0.022570273	GO_HETEROTYPIC_CELL_CELL_ADHESION
79	Down	8.39E-04	0.022583639	GO_CALCIUM_ION_REGULATED_EXOCYTOSIS
98	Down	8.51E-04	0.022818439	GO_PROTEIN_TRANSPORTER_ACTIVITY
26	Down	8.71E-04	0.023236569	GO_OXIDOREDUCTASE_ACTIVITY_ACTING_ON_A_HEME_GROUP_OF_DONORS
539	Down	8.79E-04	0.023354183	GO_NEURON_PROJECTION_DEVELOPMENT
12	Down	8.83E-04	0.023373611	GO_GUANYLATE_KINASE_ACTIVITY
171	Down	8.95E-04	0.023583167	GO_SIGNAL_RELEASE
19	Down	9.23E-04	0.024222596	GO_EPHRIN_RECEPTOR_ACTIVITY
25	Down	9.31E-04	0.024315718	GO_REGULATION_OF_VOLTAGE_GATED_CALCIUM_CHANNEL_ACTIVITY
40	Down	9.73E-04	0.025326774	GO_TRANSCRIPTION_FROM_RNA_POLYMERASE_III_PROMOTER
19	Down	9.83E-04	0.025469067	GO_LYSOPHOSPHOLIPID_ACYLTRANSFERASE_ACTIVITY
16	Down	9.91E-04	0.025565396	GO_POSITIVE_REGULATION_OF_NEUROTRANSMITTER_TRANSPORT
86	Down	0.001005846	0.025841873	GO_PHOSPHATASE_REGULATOR_ACTIVITY
42	Down	0.001038263	0.026564013	GO_DENDRITE_MORPHOGENESIS
11	Down	0.001046151	0.026655223	GO_FILOPODIUM_TIP
46	Down	0.00105621	0.026690953	GO_INTRASPECIES_INTERACTION_BETWEEN_ORGANISMS
46	Down	0.00105621	0.026690953	GO_SOCIAL_BEHAVIOR
224	Down	0.001078812	0.02715084	GO_NUCLEOSIDE_TRIPHOSPHATE_METABOLIC_PROCESS
28	Up	0.001121652	0.028114242	GO_PEPTIDE_ANTIGEN_BINDING
67	Up	0.001168611	0.029139992	GO_RESPONSE_TO_TYPE_I_INTERFERON
29	Down	0.001172027	0.029139992	GO_NEUROPEPTIDE_HORMONE_ACTIVITY
132	Down	0.001193458	0.029553667	GO_TRANSLATIONAL_INITIATION
28	Down	0.001214178	0.029946484	GO_HEPARAN_SULFATE_PROTEOGLYCAN_METABOLIC_PROCESS
135	Down	0.001225557	0.0301067	GO_ADULT_BEHAVIOR
22	Down	0.001305491	0.031859374	GO_CENTRAL_NERVOUS_SYSTEM_PROJECTION_NEURON_AXONOGENESIS
108	Down	0.001307237	0.031859374	GO_NUCLEOTIDE_EXCISION_REPAIR
27	Up	0.001315527	0.031920611	GO_REGULATION_OF_ENDOTHELIAL_CELL_DIFFERENTIATION
66	Up	0.001320103	0.031920611	GO_INTERFERON_GAMMA_MEDIATED_SIGNALING_PATHWAY
136	Down	0.001325882	0.031935109	GO_NEGATIVE_REGULATION_OF_PROTEIN_MODIFICATION_BY_SMALL_PROTEIN_CONJUGATION_OR_REMOVAL
30	Up	0.00133335	0.031990035	GO_NEURON_PROJECTION_REGENERATION
128	Up	0.00136824	0.032698436	GO_CELL_JUNCTION_ASSEMBLY
89	Down	0.001373483	0.032698436	GO_OXIDOREDUCTASE_ACTIVITY_ACTING_ON_NAD_P_H
762	Down	0.001405666	0.033335904	GO_CELL_CELL_SIGNALING
156	Down	0.001417481	0.033487305	GO_REGULATION_OF_DEPHOSPHORYLATION
64	Down	0.001425958	0.033559005	GO_TERMINAL_BOUTON
51	Down	0.001456451	0.03414631	GO_GDP_BINDING
47	Down	0.001500832	0.035053526	GO_PROTEIN_K48_LINKED_UBIQUITINATION
12	Down	0.001531031	0.035577135	GO_CEREBELLAR_GRANULAR_LAYER_DEVELOPMENT
60	Down	0.00153479	0.035577135	GO_NUCLEOLAR_PART
27	Up	0.001563194	0.036091801	GO_DEVELOPMENTAL_INDUCTION
16	Down	0.0015687	0.036091801	GO_MITOCHONDRIAL_ELECTRON_TRANSPORT_CYTOCHROME_C_TO_OXYGEN
74	Down	0.001588951	0.036363179	GO_SENSORY_PERCEPTION_OF_PAIN
71	Down	0.00159229	0.036363179	GO_SINGLE_ORGANISM_MEMBRANE_BUDDING
181	Down	0.001633041	0.037037485	GO_LOCOMOTORY_BEHAVIOR
58	Down	0.001635384	0.037037485	GO_ORGANELLE_TRANSPORT_ALONG_MICROTUBULE
11	Down	0.001639837	0.037037485	GO_NMDA_SELECTIVE_GLUTAMATE_RECEPTOR_COMPLEX
17	Down	0.001667412	0.037522859	GO_MYOSIN_V_BINDING
66	Down	0.001695308	0.038011882	GO_ADENYLATE_CYCLASE_INHIBITING_G_PROTEIN_COUPLED_RECEPTOR_SIGNALING_PATHWAY
300	Down	0.001702943	0.038044736	GO_POSITIVE_REGULATION_OF_CELL_PROJECTION_ORGANIZATION
83	Down	0.001737644	0.038679823	GO_POSITIVE_REGULATION_OF_EXOCYTOSIS
236	Down	0.001749589	0.038805623	GO_NUCLEOSIDE_MONOPHOSPHATE_METABOLIC_PROCESS
13	Down	0.001778057	0.039027295	GO_GDP_METABOLIC_PROCESS
126	Down	0.001779096	0.039027295	GO_FC_EPSILON_RECEPTOR_SIGNALING_PATHWAY
28	Up	0.001784313	0.039027295	GO_REGULATION_OF_MACROPHAGE_DERIVED_FOAM_CELL_DIFFERENTIATION
28	Down	0.001784901	0.039027295	GO_GLUTAMATE_SECRETION
51	Down	0.001796171	0.039134948	GO_CELL_PROJECTION_CYTOPLASM
25	Down	0.001813928	0.039382673	GO_NEGATIVE_REGULATION_OF_AMINE_TRANSPORT
38	Up	0.001841951	0.039844248	GO_ASTROCYTE_DIFFERENTIATION
47	Down	0.001848111	0.039844248	GO_POSITIVE_REGULATION_OF_ADENYLATE_CYCLASE_ACTIVITY
20	Down	0.001896772	0.040750851	GO_PROTEASOME_CORE_COMPLEX
303	Down	0.00190776	0.040844601	GO_POSITIVE_REGULATION_OF_NEURON_DIFFERENTIATION
60	Down	0.001917664	0.040848308	GO_POSITIVE_REGULATION_OF_LYASE_ACTIVITY
38	Down	0.001921182	0.040848308	GO_VESICLE_CYTOSKELETAL_TRAFFICKING
53	Down	0.001952813	0.041378159	GO_AEROBIC_RESPIRATION
83	Down	0.001975075	0.041706546	GO_ORGANELLE_ENVELOPE_LUMEN
15	Down	0.002005802	0.042210839	GO_REGULATION_OF_ARP2_3_COMPLEX_MEDIATED_ACTIN_NUCLEATION
52	Down	0.002096428	0.04396795	GO_NEURON_PROJECTION_EXTENSION
76	Up	0.002104935	0.043996706	GO_PROTEIN_ACTIVATION_CASCADE
139	Down	0.002141536	0.044243437	GO_NON_CANONICAL_WNT_SIGNALING_PATHWAY
343	Down	0.002143361	0.044243437	GO_NEGATIVE_REGULATION_OF_TRANSFERASE_ACTIVITY
126	Down	0.002144651	0.044243437	GO_REGULATION_OF_LIGASE_ACTIVITY
88	Down	0.002145441	0.044243437	GO_KINASE_INHIBITOR_ACTIVITY
25	Down	0.002156135	0.044315756	GO_MEMBRANE_ASSEMBLY
45	Up	0.002179799	0.044511903	GO_SCAVENGER_RECEPTOR_ACTIVITY
21	Down	0.002180116	0.044511903	GO_THREONINE_TYPE_PEPTIDASE_ACTIVITY
27	Down	0.002209422	0.044852586	GO_EXCITATORY_POSTSYNAPTIC_POTENTIAL
72	Up	0.00221135	0.044852586	GO_MICROVILLUS
74	Up	0.002227855	0.0450392	GO_EXTRACELLULAR_MATRIX_DISASSEMBLY
18	Up	0.002244313	0.045223647	GO_ASTROCYTE_DEVELOPMENT
104	Down	0.002291056	0.046015152	GO_INNATE_IMMUNE_RESPONSE_ACTIVATING_CELL_SURFACE_RECEPTOR_SIGNALING_PATHWAY
17	Up	0.002357132	0.047188567	GO_PROTEIN_BINDING_INVOLVED_IN_CELL_ADHESION
541	Down	0.00240579	0.048006801	GO_PEPTIDE_METABOLIC_PROCESS
378	Down	0.002454933	0.048829409	GO_GUANYL_NUCLEOTIDE_BINDING
12	Up	0.002481316	0.049037807	GO_CENTRAL_NERVOUS_SYSTEM_MYELINATION
12	Up	0.002481316	0.049037807	GO_AXON_ENSHEATHMENT_IN_CENTRAL_NERVOUS_SYSTEM
14	Down	0.002490561	0.049063266	GO_REGULATION_OF_SYNAPSE_MATURATION
116	Up	0.002579202	0.05064764	GO_BLOOD_MICROPARTICLE
63	Up	0.002598627	0.050867089	GO_REGULATION_OF_CHEMOKINE_PRODUCTION
15	Up	0.002670783	0.052035962	GO_COMPACT_MYELIN
14	Up	0.002675219	0.052035962	GO_MAINTENANCE_OF_PROTEIN_LOCATION_IN_NUCLEUS
26	Down	0.002695983	0.052274934	GO_SPLICEOSOMAL_TRI_SNRNP_COMPLEX
16	Down	0.002735978	0.052873005	GO_ARP2_3_COMPLEX_MEDIATED_ACTIN_NUCLEATION
103	Down	0.002743977	0.052873005	GO_SYNAPTIC_VESICLE_LOCALIZATION
113	Down	0.002764658	0.053105547	GO_MEMBRANE_BUDDING
239	Down	0.002812737	0.053485496	GO_GTPASE_ACTIVITY
72	Down	0.00281429	0.053485496	GO_NEGATIVE_REGULATION_OF_MAP_KINASE_ACTIVITY
19	Up	0.002824614	0.053485496	GO_NEGATIVE_REGULATION_OF_VIRAL_ENTRY_INTO_HOST_CELL
16	Up	0.002839387	0.053485496	GO_TRANSFORMING_GROWTH_FACTOR_BETA_BINDING
36	Down	0.002842352	0.053485496	GO_RNA_CAPPING
36	Down	0.002842352	0.053485496	GO_7_METHYLGUANOSINE_RNA_CAPPING
11	Down	0.002845158	0.053485496	GO_COENZYME_A_BIOSYNTHETIC_PROCESS
180	Up	0.002856302	0.053531782	GO_INTERMEDIATE_FILAMENT
88	Up	0.002869162	0.053609862	GO_NEGATIVE_REGULATION_OF_VIRAL_PROCESS
26	Up	0.002935115	0.054642435	GO_OXIDOREDUCTASE_ACTIVITY_ACTING_ON_THE_CH_NH_GROUP_OF_DONORS
24	Down	0.002942149	0.054642435	GO_CYTOCHROME_COMPLEX_ASSEMBLY
12	Up	0.002957376	0.054760309	GO_POST_EMBRYONIC_MORPHOGENESIS
408	Down	0.002977554	0.054968858	GO_MITOCHONDRIAL_MATRIX
30	Down	0.003028174	0.05551688	GO_MEMBRANE_BIOGENESIS
60	Down	0.003029336	0.05551688	GO_POSITIVE_REGULATION_OF_CYCLASE_ACTIVITY
12	Up	0.00303425	0.05551688	GO_MYELIN_MAINTENANCE
83	Down	0.003084892	0.056188752	GO_TRANSLATION_FACTOR_ACTIVITY_RNA_BINDING
143	Down	0.003089197	0.056188752	GO_ADENYLATE_CYCLASE_MODULATING_G_PROTEIN_COUPLED_RECEPTOR_SIGNALING_PATHWAY
433	Down	0.003159537	0.057222961	GO_POSITIVE_REGULATION_OF_NERVOUS_SYSTEM_DEVELOPMENT
14	Up	0.003164617	0.057222961	GO_POST_EMBRYONIC_ORGAN_DEVELOPMENT
13	Down	0.003195412	0.057604643	GO_REGULATION_OF_PHOSPHOLIPID_BIOSYNTHETIC_PROCESS
76	Down	0.00320441	0.057604643	GO_VESICLE_TARGETING
135	Up	0.003250237	0.058120278	GO_GLIAL_CELL_DIFFERENTIATION
12	Up	0.003251945	0.058120278	GO_HEMIDESMOSOME_ASSEMBLY
17	Up	0.003318446	0.05891014	GO_POSITIVE_REGULATION_OF_STEROL_TRANSPORT
17	Up	0.003318446	0.05891014	GO_POSITIVE_REGULATION_OF_CHOLESTEROL_TRANSPORT
59	Down	0.003324802	0.05891014	GO_PRERIBOSOME
73	Down	0.003369531	0.0595316	GO_ADENYLATE_CYCLASE_ACTIVATING_G_PROTEIN_COUPLED_RECEPTOR_SIGNALING_PATHWAY
12	Down	0.003381814	0.059577909	GO_METHYLOSOME
11	Down	0.003401081	0.059746629	GO_PROTON_TRANSPORTING_ATP_SYNTHASE_ACTIVITY_ROTATIONAL_MECHANISM
12	Up	0.003442632	0.060304742	GO_IRON_ION_IMPORT
88	Down	0.003456711	0.060379828	GO_SYNAPTIC_VESICLE_CYCLE
188	Down	0.003475485	0.060536265	GO_REGULATION_OF_NEUROTRANSMITTER_LEVELS
299	Up	0.003503592	0.060775467	GO_EXTRACELLULAR_STRUCTURE_ORGANIZATION
14	Down	0.003508931	0.060775467	GO_MAP_KINASE_ACTIVITY
75	Down	0.003536064	0.06107387	GO_PROTEIN_N_LINKED_GLYCOSYLATION
153	Down	0.003606493	0.062116302	GO_NEUROTRANSMITTER_TRANSPORT
91	Up	0.003633866	0.062240051	GO_ENSHEATHMENT_OF_NEURONS
91	Up	0.003633866	0.062240051	GO_AXON_ENSHEATHMENT
14	Down	0.00373915	0.063865922	GO_POSITIVE_REGULATION_OF_MITOCHONDRIAL_FISSION
23	Down	0.003782969	0.064435878	GO_PROTEASOME_ACCESSORY_COMPLEX
203	Down	0.003806636	0.064538299	GO_NEURON_PROJECTION_GUIDANCE
12	Down	0.003849771	0.064538299	GO_POSITIVE_REGULATION_OF_NEUROTRANSMITTER_SECRETION
11	Up	0.003851783	0.064538299	GO_L_PHENYLALANINE_METABOLIC_PROCESS
11	Up	0.003851783	0.064538299	GO_ERYTHROSE_4_PHOSPHATE_PHOSPHOENOLPYRUVATE_FAMILY_AMINO_ACID_CATABOLIC_PROCESS
11	Up	0.003851783	0.064538299	GO_ERYTHROSE_4_PHOSPHATE_PHOSPHOENOLPYRUVATE_FAMILY_AMINO_ACID_METABOLIC_PROCESS
11	Up	0.003851783	0.064538299	GO_L_PHENYLALANINE_CATABOLIC_PROCESS
12	Down	0.003894705	0.06508062	GO_TAU_PROTEIN_KINASE_ACTIVITY
41	Down	0.003906074	0.065094191	GO_RNA_POLYMERASE_ACTIVITY
109	Down	0.003962912	0.065863389	GO_REGULATION_OF_ESTABLISHMENT_OF_PLANAR_POLARITY
73	Down	0.003996999	0.066084537	GO_HIPPOCAMPUS_DEVELOPMENT
214	Up	0.003997654	0.066084537	GO_SERINE_HYDROLASE_ACTIVITY
17	Down	0.00404073	0.06661802	GO_PEPTIDE_HORMONE_RECEPTOR_BINDING
152	Down	0.004057772	0.066720593	GO_PALLIUM_DEVELOPMENT
12	Down	0.004079648	0.066901892	GO_REGULATION_OF_RNA_POLYMERASE_II_TRANSCRIPTIONAL_PREINITIATION_COMPLEX_ASSEMBLY
289	Down	0.004132438	0.067467738	GO_GENERATION_OF_PRECURSOR_METABOLITES_AND_ENERGY
123	Down	0.004146882	0.067467738	GO_GOLGI_STACK
227	Down	0.004149676	0.067467738	GO_TELENCEPHALON_DEVELOPMENT
84	Up	0.004157921	0.067467738	GO_CILIARY_PLASM
34	Up	0.004213031	0.067894639	GO_OLIGODENDROCYTE_DEVELOPMENT
17	Down	0.004218394	0.067894639	GO_INNER_MITOCHONDRIAL_MEMBRANE_ORGANIZATION
241	Down	0.004227423	0.067894639	GO_RRNA_METABOLIC_PROCESS
11	Down	0.004228275	0.067894639	GO_NEGATIVE_REGULATION_OF_DENDRITIC_SPINE_DEVELOPMENT
51	Down	0.004280924	0.068561501	GO_PROTEIN_TRANSMEMBRANE_TRANSPORT
12	Down	0.004327629	0.069058445	GO_RNA_POLYMERASE_I_ACTIVITY
102	Down	0.004342509	0.069058445	GO_REGULATION_OF_PROTEIN_UBIQUITINATION_INVOLVED_IN_UBIQUITIN_DEPENDENT_PROTEIN_CATABOLIC_PROCESS
404	Down	0.004349494	0.069058445	GO_REGULATION_OF_NEURON_PROJECTION_DEVELOPMENT
137	Down	0.004356752	0.069058445	GO_HYDROGEN_TRANSPORT
182	Down	0.004418763	0.069861771	GO_REGULATION_OF_EXOCYTOSIS
16	Down	0.004511946	0.071111504	GO_REGULATION_OF_NFAT_PROTEIN_IMPORT_INTO_NUCLEUS
15	Up	0.004520874	0.071111504	GO_RESPONSE_TO_MERCURY_ION
691	Down	0.004606551	0.072204314	GO_GOLGI_MEMBRANE
36	Down	0.004613769	0.072204314	GO_GLIAL_CELL_MIGRATION
19	Up	0.004636515	0.072376582	GO_RESPONSE_TO_FOOD
1061	Down	0.004689342	0.073016369	GO_ENVELOPE
73	Up	0.004767712	0.074049654	GO_ACUTE_INFLAMMATORY_RESPONSE
42	Up	0.004872273	0.075483502	GO_BICARBONATE_TRANSPORT
346	Down	0.004893837	0.075627574	GO_SMALL_GTPASE_MEDIATED_SIGNAL_TRANSDUCTION
104	Down	0.004918924	0.075825215	GO_ENDOPLASMIC_RETICULUM_GOLGI_INTERMEDIATE_COMPARTMENT
97	Up	0.00495045	0.07612089	GO_GLAND_MORPHOGENESIS
136	Up	0.004995818	0.076538036	GO_RESPONSE_TO_INTERFERON_GAMMA
104	Down	0.005002405	0.076538036	GO_CEREBRAL_CORTEX_DEVELOPMENT
110	Down	0.005025033	0.07669395	GO_NEURON_MIGRATION
43	Up	0.005089601	0.077487603	GO_ACUTE_PHASE_RESPONSE
165	Down	0.005122203	0.077791878	GO_ER_TO_GOLGI_VESICLE_MEDIATED_TRANSPORT
26	Up	0.005157349	0.077792973	GO_SCHWANN_CELL_DEVELOPMENT
32	Down	0.005166163	0.077792973	GO_SMALL_SUBUNIT_PROCESSOME
34	Down	0.00516753	0.077792973	GO_CAMP_METABOLIC_PROCESS
170	Down	0.00517605	0.077792973	GO_G_PROTEIN_COUPLED_RECEPTOR_SIGNALING_PATHWAY_COUPLED_TO_CYCLIC_NUCLEOTIDE_SECOND_MESSENGER
36	Down	0.005194328	0.077792973	GO_DNA_DAMAGE_RESPONSE_DETECTION_OF_DNA_DAMAGE
146	Down	0.005200152	0.077792973	GO_CULLIN_RING_UBIQUITIN_LIGASE_COMPLEX
14	Up	0.00521059	0.077792973	GO_POSITIVE_REGULATION_OF_CHOLESTEROL_EFFLUX
419	Up	0.005321015	0.079044293	GO_EXTRACELLULAR_MATRIX
10	Up	0.005323272	0.079044293	GO_MHC_CLASS_II_RECEPTOR_ACTIVITY
26	Up	0.005332862	0.079044293	GO_FLUID_TRANSPORT
1599	Down	0.005369686	0.079399247	GO_MITOCHONDRION
47	Up	0.005418519	0.079929643	GO_POSITIVE_REGULATION_OF_REACTIVE_OXYGEN_SPECIES_BIOSYNTHETIC_PROCESS
31	Up	0.005439335	0.080045201	GO_SCHWANN_CELL_DIFFERENTIATION
23	Up	0.005468442	0.080281935	GO_AXONEME_PART
27	Down	0.005558066	0.081261838	GO_NEGATIVE_REGULATION_OF_LYASE_ACTIVITY
55	Down	0.005561546	0.081261838	GO_REGULATION_OF_POSTSYNAPTIC_MEMBRANE_POTENTIAL
15	Up	0.005656671	0.082456348	GO_REGULATION_OF_LIPOPROTEIN_METABOLIC_PROCESS
22	Up	0.005692981	0.082595114	GO_MYELINATION_IN_PERIPHERAL_NERVOUS_SYSTEM
22	Up	0.005692981	0.082595114	GO_PERIPHERAL_NERVOUS_SYSTEM_AXON_ENSHEATHMENT
24	Up	0.005754156	0.083091625	GO_FOCAL_ADHESION_ASSEMBLY
24	Up	0.005754156	0.083091625	GO_CELL_SUBSTRATE_ADHERENS_JUNCTION_ASSEMBLY
23	Up	0.005774138	0.083185363	GO_PROSTATE_GLAND_MORPHOGENESIS
19	Up	0.005803998	0.083420629	GO_BICARBONATE_TRANSMEMBRANE_TRANSPORTER_ACTIVITY
292	Down	0.005830321	0.083604097	GO_RIBOSOME_BIOGENESIS
54	Up	0.005850311	0.083696103	GO_COMPLEMENT_ACTIVATION
21	Down	0.005874757	0.083851279	GO_CYTOCHROME_COMPLEX
13	Up	0.006007802	0.085552207	GO_LEFT_RIGHT_AXIS_SPECIFICATION
21	Up	0.006025957	0.085613022	GO_FIBRINOLYSIS
12	Down	0.006149323	0.086991789	GO_OUTER_MITOCHONDRIAL_MEMBRANE_PROTEIN_COMPLEX
186	Down	0.00615122	0.086991789	GO_FC_RECEPTOR_SIGNALING_PATHWAY
18	Up	0.006205038	0.087552098	GO_IMMUNOGLOBULIN_BINDING
15	Down	0.006300533	0.08869655	GO_NEGATIVE_REGULATION_OF_PHOSPHOPROTEIN_PHOSPHATASE_ACTIVITY
47	Down	0.006319073	0.088754901	GO_POSITIVE_REGULATION_OF_DEPHOSPHORYLATION
30	Down	0.006375008	0.088801976	GO_RESPONSE_TO_MORPHINE
30	Down	0.006375008	0.088801976	GO_RESPONSE_TO_ISOQUINOLINE_ALKALOID
41	Up	0.006398451	0.088801976	GO_CARBOXYPEPTIDASE_ACTIVITY
51	Down	0.006406091	0.088801976	GO_REGULATION_OF_INSULIN_SECRETION_INVOLVED_IN_CELLULAR_RESPONSE_TO_GLUCOSE_STIMULUS
49	Down	0.006407286	0.088801976	GO_POSITIVE_REGULATION_OF_REGULATED_SECRETORY_PATHWAY
12	Down	0.006408835	0.088801976	GO_CALCIUM_DEPENDENT_PROTEIN_KINASE_ACTIVITY
76	Down	0.006506369	0.089951276	GO_DEVELOPMENTAL_CELL_GROWTH
22	Up	0.006668807	0.091685213	GO_AXONEMAL_DYNEIN_COMPLEX_ASSEMBLY
64	Down	0.00667562	0.091685213	GO_PROTEIN_SERINE_THREONINE_PHOSPHATASE_ACTIVITY
11	Down	0.006686634	0.091685213	GO_CHEMICAL_HOMEOSTASIS_WITHIN_A_TISSUE
15	Down	0.006691266	0.091685213	GO_MITOCHONDRIAL_FISSION
51	Up	0.006787391	0.092502241	GO_BASAL_PART_OF_CELL
23	Down	0.006790058	0.092502241	GO_NUCLEOTIDE_EXCISION_REPAIR_DNA_DAMAGE_RECOGNITION
44	Down	0.006795899	0.092502241	GO_NEGATIVE_REGULATION_OF_ERBB_SIGNALING_PATHWAY
189	Down	0.006899649	0.0935705	GO_POSITIVE_REGULATION_OF_CELLULAR_PROTEIN_CATABOLIC_PROCESS
31	Up	0.006904732	0.0935705	GO_LUMENAL_SIDE_OF_MEMBRANE
340	Down	0.006978972	0.094314927	GO_REGULATION_OF_MEMBRANE_POTENTIAL
177	Down	0.006990257	0.094314927	GO_PHOSPHOPROTEIN_PHOSPHATASE_ACTIVITY
14	Down	0.00715703	0.096236071	GO_MAP_KINASE_PHOSPHATASE_ACTIVITY
60	Down	0.007163859	0.096236071	GO_PHOSPHOPROTEIN_BINDING
11	Up	0.00719741	0.096476592	GO_SEQUESTERING_OF_METAL_ION
14	Up	0.007299497	0.097477162	GO_AXONEMAL_DYNEIN_COMPLEX
21	Down	0.007303673	0.097477162	GO_PROTON_TRANSPORTING_TWO_SECTOR_ATPASE_COMPLEX_PROTON_TRANSPORTING_DOMAIN
92	Down	0.007435132	0.098951713	GO_MITOCHONDRIAL_MEMBRANE_ORGANIZATION
11	Down	0.00744931	0.098951713	GO_PROTON_TRANSPORTING_ATP_SYNTHASE_COMPLEX_COUPLING_FACTOR_F_O_
38	Down	0.007462301	0.098951713	GO_ACTIVATION_OF_ADENYLATE_CYCLASE_ACTIVITY
53	Up	0.007532825	0.09962821	GO_INTRINSIC_APOPTOTIC_SIGNALING_PATHWAY_BY_P53_CLASS_MEDIATOR
74	Down	0.007545633	0.09962821	GO_VESICLE_COATING
16	Up	0.007666496	0.100750318	GO_TYPE_I_INTERFERON_RECEPTOR_BINDING
13	Down	0.007679577	0.100750318	GO_DNA_DIRECTED_RNA_POLYMERASE_I_COMPLEX
13	Down	0.007679638	0.100750318	GO_REGULATION_OF_SHORT_TERM_NEURONAL_SYNAPTIC_PLASTICITY
30	Down	0.007725952	0.101142722	GO_PRE_AUTOPHAGOSOMAL_STRUCTURE
97	Down	0.007751957	0.101268146	GO_NEUROMUSCULAR_PROCESS
22	Up	0.007842766	0.102237833	GO_NEGATIVE_REGULATION_OF_CYTOKINE_PRODUCTION_INVOLVED_IN_IMMUNE_RESPONSE
192	Down	0.007863808	0.102295859	GO_POSITIVE_REGULATION_OF_PROTEIN_MODIFICATION_BY_SMALL_PROTEIN_CONJUGATION_OR_REMOVAL
46	Down	0.007930728	0.102493529	GO_RESPONSE_TO_COCAINE
133	Down	0.007944592	0.102493529	GO_UDP_GLYCOSYLTRANSFERASE_ACTIVITY
20	Up	0.007945492	0.102493529	GO_REGULATION_OF_PEPTIDYL_SERINE_PHOSPHORYLATION_OF_STAT_PROTEIN
20	Up	0.007945492	0.102493529	GO_POSITIVE_REGULATION_OF_PEPTIDYL_SERINE_PHOSPHORYLATION_OF_STAT_PROTEIN
47	Up	0.008029693	0.103188911	GO_POSITIVE_REGULATION_OF_CHEMOKINE_PRODUCTION
23	Up	0.00803287	0.103188911	GO_DEATH_RECEPTOR_ACTIVITY
257	Down	0.008064245	0.103376585	GO_UBIQUITIN_LIGASE_COMPLEX
58	Down	0.008104961	0.10354876	GO_PROTEOGLYCAN_BIOSYNTHETIC_PROCESS
31	Up	0.008111264	0.10354876	GO_NEURON_FATE_SPECIFICATION
34	Up	0.00818877	0.104322223	GO_PTERIDINE_CONTAINING_COMPOUND_METABOLIC_PROCESS
15	Down	0.008265501	0.105082639	GO_PRENYLTRANSFERASE_ACTIVITY
16	Down	0.008302575	0.105336781	GO_POSITIVE_REGULATION_OF_TRANSFORMING_GROWTH_FACTOR_BETA_PRODUCTION
11	Down	0.008379289	0.106091781	GO_STORE_OPERATED_CALCIUM_CHANNEL_ACTIVITY
91	Down	0.00843772	0.106612668	GO_GOLGI_CISTERNA
16	Down	0.008516032	0.107218361	GO_REGULATION_OF_NOREPINEPHRINE_SECRETION
173	Down	0.008520434	0.107218361	GO_PLASMA_MEMBRANE_RECEPTOR_COMPLEX
76	Down	0.00868566	0.108665614	GO_RETROGRADE_VESICLE_MEDIATED_TRANSPORT_GOLGI_TO_ER
21	Down	0.008688315	0.108665614	GO_SIALYLATION
21	Down	0.008688315	0.108665614	GO_SIALYLTRANSFERASE_ACTIVITY
184	Down	0.008879075	0.110826667	GO_KINASE_REGULATOR_ACTIVITY
17	Down	0.008903019	0.110901045	GO_POSITIVE_REGULATION_OF_SYNAPTIC_TRANSMISSION_GLUTAMATERGIC
148	Up	0.008986383	0.111713789	GO_NEGATIVE_REGULATION_OF_MULTI_ORGANISM_PROCESS
92	Down	0.009049898	0.112104084	GO_DNA_TEMPLATED_TRANSCRIPTION_ELONGATION
21	Up	0.009057271	0.112104084	GO_METANEPHRIC_NEPHRON_MORPHOGENESIS
27	Down	0.009072322	0.112104084	GO_CENTRAL_NERVOUS_SYSTEM_NEURON_AXONOGENESIS
19	Up	0.009107995	0.112319795	GO_PLATELET_DENSE_GRANULE
17	Down	0.009168535	0.112840687	GO_REGULATION_OF_CALCINEURIN_NFAT_SIGNALING_CASCADE
677	Down	0.00922094	0.113259595	GO_NEURON_DEVELOPMENT
11	Down	0.009371906	0.114885038	GO_OLFACTORY_BULB_INTERNEURON_DEVELOPMENT
12	Down	0.00950903	0.116334682	GO_ACETYL_COA_BIOSYNTHETIC_PROCESS
23	Down	0.009649163	0.117815322	GO_GAMMA_AMINOBUTYRIC_ACID_SIGNALING_PATHWAY
156	Up	0.009683265	0.11799805	GO_REGENERATION
1006	Down	0.009762087	0.118723925	GO_MEMBRANE_PROTEIN_COMPLEX
15	Up	0.009998725	0.121362478	GO_CELLULAR_RESPONSE_TO_ZINC_ION
42	Up	0.010166527	0.122951985	GO_REGULATION_OF_NIK_NF_KAPPAB_SIGNALING
117	Down	0.010169561	0.122951985	GO_REGULATION_OF_RECEPTOR_ACTIVITY
517	Down	0.01026406	0.123806944	GO_NCRNA_METABOLIC_PROCESS
11	Down	0.010280434	0.123806944	GO_HIGH_VOLTAGE_GATED_CALCIUM_CHANNEL_ACTIVITY
36	Up	0.010326069	0.124114117	GO_CILIUM_MOVEMENT
49	Down	0.010350183	0.124161919	GO_VISUAL_BEHAVIOR
72	Down	0.010406849	0.124473952	GO_GOLGI_CISTERNA_MEMBRANE
87	Down	0.010416568	0.124473952	GO_NCRNA_TRANSCRIPTION
25	Up	0.010447375	0.124600609	GO_POSITIVE_REGULATION_OF_COAGULATION
153	Down	0.010541343	0.125478617	GO_HOMOPHILIC_CELL_ADHESION_VIA_PLASMA_MEMBRANE_ADHESION_MOLECULES
46	Up	0.010727607	0.127217466	GO_HUMORAL_IMMUNE_RESPONSE_MEDIATED_BY_CIRCULATING_IMMUNOGLOBULIN
619	Down	0.010728687	0.127217466	GO_PROTEIN_UBIQUITINATION
38	Down	0.010759153	0.127333852	GO_CELLULAR_RESPONSE_TO_GLUCAGON_STIMULUS
36	Down	0.010972655	0.129611863	GO_DELAYED_RECTIFIER_POTASSIUM_CHANNEL_ACTIVITY
139	Down	0.011065983	0.130464342	GO_LIGAND_GATED_CHANNEL_ACTIVITY
23	Up	0.011097865	0.130590521	GO_BITTER_TASTE_RECEPTOR_ACTIVITY
44	Down	0.011179438	0.131050214	GO_NEGATIVE_REGULATION_OF_JAK_STAT_CASCADE
44	Down	0.011179438	0.131050214	GO_NEGATIVE_REGULATION_OF_STAT_CASCADE
13	Down	0.011229395	0.131137211	GO_SUBSTRATE_INDEPENDENT_TELENCEPHALIC_TANGENTIAL_INTERNEURON_MIGRATION
13	Down	0.011229395	0.131137211	GO_SUBSTRATE_INDEPENDENT_TELENCEPHALIC_TANGENTIAL_MIGRATION
16	Down	0.011284743	0.131534453	GO_ENDOLYSOSOME
14	Down	0.011476174	0.133513373	GO_AXOLEMMA
129	Down	0.011500371	0.133516391	GO_CHANNEL_REGULATOR_ACTIVITY
44	Up	0.01151974	0.133516391	GO_AXONEME_ASSEMBLY
11	Up	0.011663677	0.134668476	GO_INNER_DYNEIN_ARM_ASSEMBLY
82	Down	0.011674931	0.134668476	GO_NIK_NF_KAPPAB_SIGNALING
17	Down	0.011684663	0.134668476	GO_COENZYME_A_METABOLIC_PROCESS
48	Up	0.011710718	0.13471695	GO_REGULATION_OF_HUMORAL_IMMUNE_RESPONSE
79	Up	0.01178926	0.134996468	GO_REGULATION_OF_PROTEIN_MATURATION
77	Down	0.011797072	0.134996468	GO_TRANSCRIPTION_ELONGATION_FROM_RNA_POLYMERASE_II_PROMOTER
114	Up	0.011800697	0.134996468	GO_CELLULAR_RESPONSE_TO_INTERFERON_GAMMA
55	Up	0.011880067	0.135652766	GO_PEPTIDE_CROSS_LINKING
688	Down	0.011910725	0.135751442	GO_RIBONUCLEOPROTEIN_COMPLEX
17	Up	0.011940008	0.135834113	GO_SIGNALING_PATTERN_RECOGNITION_RECEPTOR_ACTIVITY
390	Down	0.011996454	0.136166429	GO_PURINE_CONTAINING_COMPOUND_METABOLIC_PROCESS
216	Down	0.012013386	0.136166429	GO_PROTEIN_FOLDING
44	Up	0.012081236	0.13655346	GO_BRANCHING_INVOLVED_IN_URETERIC_BUD_MORPHOGENESIS
124	Up	0.012091824	0.13655346	GO_EXTRACELLULAR_MATRIX_COMPONENT
19	Down	0.012154356	0.136742865	GO_SMALL_NUCLEOLAR_RIBONUCLEOPROTEIN_COMPLEX
29	Up	0.012173084	0.136742865	GO_REGULATION_OF_HEART_MORPHOGENESIS
126	Down	0.012175637	0.136742865	GO_REGULATION_OF_REGULATED_SECRETORY_PATHWAY
333	Down	0.012197304	0.136742865	GO_TRANSPORT_VESICLE
132	Down	0.01224933	0.137076894	GO_VOLTAGE_GATED_CATION_CHANNEL_ACTIVITY
695	Down	0.012362364	0.138091187	GO_CELLULAR_AMIDE_METABOLIC_PROCESS
15	Up	0.012449724	0.138815552	GO_POSITIVE_REGULATION_OF_ENDOTHELIAL_CELL_DIFFERENTIATION
21	Up	0.012534188	0.139505058	GO_CELLULAR_RESPONSE_TO_OSMOTIC_STRESS
26	Down	0.012597319	0.139955076	GO_NEUROMUSCULAR_SYNAPTIC_TRANSMISSION
61	Down	0.012640519	0.140182451	GO_CUL3_RING_UBIQUITIN_LIGASE_COMPLEX
30	Up	0.012703913	0.140632548	GO_INTRINSIC_APOPTOTIC_SIGNALING_PATHWAY_IN_RESPONSE_TO_DNA_DAMAGE_BY_P53_CLASS_MEDIATOR
68	Up	0.012909062	0.142633276	GO_IRON_ION_HOMEOSTASIS
276	Down	0.01294511	0.142633276	GO_REGULATION_OF_PROTEIN_MODIFICATION_BY_SMALL_PROTEIN_CONJUGATION_OR_REMOVAL
35	Up	0.012954044	0.142633276	GO_PROTEIN_LIPID_COMPLEX_SUBUNIT_ORGANIZATION
18	Up	0.013040857	0.142647717	GO_SERINE_TYPE_EXOPEPTIDASE_ACTIVITY
11	Down	0.013047894	0.142647717	GO_CARDIAC_MUSCLE_ADAPTATION
11	Down	0.013047894	0.142647717	GO_MUSCLE_HYPERTROPHY_IN_RESPONSE_TO_STRESS
11	Down	0.013047894	0.142647717	GO_CARDIAC_MUSCLE_HYPERTROPHY_IN_RESPONSE_TO_STRESS
102	Up	0.013111364	0.142848309	GO_NEGATIVE_REGULATION_OF_IMMUNE_EFFECTOR_PROCESS
193	Up	0.013118904	0.142848309	GO_CONNECTIVE_TISSUE_DEVELOPMENT
11	Down	0.013135743	0.142848309	GO_REGULATION_OF_ATTACHMENT_OF_SPINDLE_MICROTUBULES_TO_KINETOCHORE
80	Up	0.013183814	0.143092194	GO_SECRETORY_GRANULE_LUMEN
309	Down	0.013204583	0.143092194	GO_GOLGI_VESICLE_TRANSPORT
247	Down	0.013289792	0.143568875	GO_NEGATIVE_REGULATION_OF_KINASE_ACTIVITY
15	Down	0.013310421	0.143568875	GO_PROTEIN_O_LINKED_MANNOSYLATION
338	Down	0.013318423	0.143568875	GO_ESTABLISHMENT_OF_PROTEIN_LOCALIZATION_TO_ORGANELLE
19	Up	0.013420835	0.144240156	GO_CELLULAR_RESPONSE_TO_REACTIVE_NITROGEN_SPECIES
92	Up	0.013435206	0.144240156	GO_NEPHRON_EPITHELIUM_DEVELOPMENT
69	Down	0.013450874	0.144240156	GO_REGULATION_OF_CALCIUM_ION_TRANSMEMBRANE_TRANSPORTER_ACTIVITY
38	Down	0.013507204	0.144592737	GO_RAC_GTPASE_BINDING
15	Up	0.013573461	0.144880608	GO_POSITIVE_REGULATION_OF_MACROPHAGE_DERIVED_FOAM_CELL_DIFFERENTIATION
61	Up	0.013581088	0.144880608	GO_REGULATION_OF_SMOOTHENED_SIGNALING_PATHWAY
21	Up	0.013695047	0.145746938	GO_AXON_REGENERATION
102	Down	0.013709573	0.145746938	GO_PROTEIN_TYROSINE_PHOSPHATASE_ACTIVITY
241	Down	0.013744004	0.145861492	GO_PROTEIN_POLYUBIQUITINATION
13	Down	0.013947724	0.147618007	GO_DENSE_CORE_GRANULE
17	Up	0.013957395	0.147618007	GO_NEGATIVE_REGULATION_OF_ANOIKIS
12	Up	0.013984034	0.147646494	GO_ONE_CARBON_COMPOUND_TRANSPORT
53	Up	0.014027811	0.14785553	GO_MESONEPHRIC_TUBULE_MORPHOGENESIS
27	Down	0.014067189	0.147948567	GO_HYDROGEN_EXPORTING_ATPASE_ACTIVITY
87	Down	0.01410718	0.147948567	GO_REGULATION_OF_CATION_CHANNEL_ACTIVITY
11	Up	0.014108664	0.147948567	GO_MHC_CLASS_I_PROTEIN_COMPLEX
349	Up	0.014132615	0.147948567	GO_OLFACTORY_RECEPTOR_ACTIVITY
93	Up	0.014178948	0.148182023	GO_BASEMENT_MEMBRANE
15	Up	0.014343643	0.149503819	GO_NEGATIVE_REGULATION_OF_INTERLEUKIN_8_PRODUCTION
31	Down	0.014368006	0.149503819	GO_PHOSPHOLIPASE_C_ACTIVITY
26	Up	0.014378165	0.149503819	GO_POSITIVE_REGULATION_OF_TISSUE_REMODELING
17	Up	0.014460986	0.149906791	GO_NOTOCHORD_DEVELOPMENT
146	Up	0.014480984	0.149906791	GO_CARTILAGE_DEVELOPMENT
209	Up	0.014489855	0.149906791	GO_SKIN_DEVELOPMENT
99	Up	0.014541316	0.150047894	GO_VESICLE_LUMEN
13	Up	0.014567491	0.150047894	GO_S100_PROTEIN_BINDING
43	Down	0.014576498	0.150047894	GO_STEROL_BIOSYNTHETIC_PROCESS
419	Down	0.01463688	0.15041834	GO_RIBONUCLEOPROTEIN_COMPLEX_BIOGENESIS
209	Down	0.014686904	0.150681283	GO_CYTOSOLIC_TRANSPORT
42	Down	0.014799641	0.151459819	GO_NEGATIVE_REGULATION_OF_CYCLIC_NUCLEOTIDE_METABOLIC_PROCESS
22	Up	0.014830379	0.151459819	GO_REGULATION_OF_ESTABLISHMENT_OR_MAINTENANCE_OF_CELL_POLARITY
11	Down	0.014836479	0.151459819	GO_CRISTAE_FORMATION
52	Up	0.014897655	0.15164405	GO_REGULATION_OF_NITRIC_OXIDE_BIOSYNTHETIC_PROCESS
20	Up	0.014903713	0.15164405	GO_RESPONSE_TO_INTERFERON_ALPHA
13	Up	0.014978396	0.15215287	GO_POSITIVE_REGULATION_OF_STEROID_BIOSYNTHETIC_PROCESS
11	Up	0.015021454	0.152339281	GO_PROTEIN_BINDING_INVOLVED_IN_CELL_CELL_ADHESION
31	Down	0.015059841	0.152477802	GO_MULTIVESICULAR_BODY_ORGANIZATION
18	Down	0.015164663	0.153287395	GO_RETINAL_GANGLION_CELL_AXON_GUIDANCE
69	Up	0.015201488	0.153408142	GO_MICROTUBULE_BUNDLE_FORMATION
13	Up	0.015301652	0.15415756	GO_MATURE_B_CELL_DIFFERENTIATION_INVOLVED_IN_IMMUNE_RESPONSE
11	Up	0.015328145	0.15415756	GO_EXTERNAL_ENCAPSULATING_STRUCTURE
104	Up	0.015354676	0.15415756	GO_PROTEASE_BINDING
15	Down	0.015375754	0.15415756	GO_HEPARAN_SULFATE_SULFOTRANSFERASE_ACTIVITY
29	Up	0.015427642	0.154270807	GO_NEGATIVE_REGULATION_OF_PRODUCTION_OF_MOLECULAR_MEDIATOR_OF_IMMUNE_RESPONSE
22	Down	0.015456368	0.154270807	GO_POSITIVE_REGULATION_OF_PROTEIN_AUTOPHOSPHORYLATION
414	Down	0.015487578	0.154270807	GO_UBIQUITIN_LIKE_PROTEIN_TRANSFERASE_ACTIVITY
271	Down	0.015498074	0.154270807	GO_REGULATION_OF_CELLULAR_PROTEIN_CATABOLIC_PROCESS
17	Up	0.015512147	0.154270807	GO_DORSAL_VENTRAL_NEURAL_TUBE_PATTERNING
58	Down	0.01568141	0.155703016	GO_MAIN_AXON
55	Up	0.015740744	0.156040882	GO_ACTIN_FILAMENT_BUNDLE
48	Up	0.015909522	0.157460859	GO_NEGATIVE_REGULATION_OF_VIRAL_GENOME_REPLICATION
62	Down	0.015947353	0.157465929	GO_ANTIGEN_PROCESSING_AND_PRESENTATION_OF_EXOGENOUS_PEPTIDE_ANTIGEN_VIA_MHC_CLASS_I
24	Up	0.01596111	0.157465929	GO_TRANSCRIPTION_COFACTOR_BINDING
89	Down	0.016031605	0.157493427	GO_PURINE_NUCLEOSIDE_BIOSYNTHETIC_PROCESS
89	Down	0.016031605	0.157493427	GO_PURINE_RIBONUCLEOSIDE_BIOSYNTHETIC_PROCESS
203	Down	0.016040524	0.157493427	GO_CELL_CELL_ADHESION_VIA_PLASMA_MEMBRANE_ADHESION_MOLECULES
24	Down	0.01607838	0.157614139	GO_EPHRIN_RECEPTOR_BINDING
15	Down	0.016213408	0.158685514	GO_GABA_RECEPTOR_BINDING
223	Up	0.016302027	0.159300002	GO_INTERMEDIATE_FILAMENT_CYTOSKELETON
13	Down	0.016420415	0.159991578	GO_ASYMMETRIC_CELL_DIVISION
178	Down	0.016424695	0.159991578	GO_REGULATION_OF_PROTEASOMAL_PROTEIN_CATABOLIC_PROCESS
61	Up	0.016506558	0.160343358	GO_REGULATION_OF_INTERLEUKIN_8_PRODUCTION
39	Up	0.016512817	0.160343358	GO_PEPTIDYL_TYROSINE_AUTOPHOSPHORYLATION
15	Up	0.016577175	0.160715192	GO_MAINTENANCE_OF_GASTROINTESTINAL_EPITHELIUM
36	Down	0.016677356	0.161432618	GO_AXON_EXTENSION
15	Down	0.016795858	0.162195905	GO_POLYAMINE_METABOLIC_PROCESS
76	Up	0.016822384	0.162195905	GO_MICROTUBULE_MOTOR_ACTIVITY
85	Up	0.016835125	0.162195905	GO_POSITIVE_REGULATION_OF_REACTIVE_OXYGEN_SPECIES_METABOLIC_PROCESS
169	Up	0.016865151	0.162231704	GO_PEPTIDASE_INHIBITOR_ACTIVITY
66	Up	0.01694325	0.16238071	GO_CARGO_RECEPTOR_ACTIVITY
134	Down	0.01694906	0.16238071	GO_PROTEIN_UBIQUITINATION_INVOLVED_IN_UBIQUITIN_DEPENDENT_PROTEIN_CATABOLIC_PROCESS
189	Down	0.016959646	0.16238071	GO_PROTEIN_DEPHOSPHORYLATION
22	Down	0.017044732	0.162702558	GO_GABA_RECEPTOR_ACTIVITY
14	Up	0.017046035	0.162702558	GO_SERINE_TYPE_CARBOXYPEPTIDASE_ACTIVITY
22	Down	0.017161238	0.163548982	GO_INTRINSIC_COMPONENT_OF_MITOCHONDRIAL_OUTER_MEMBRANE
27	Up	0.017364938	0.16510648	GO_AXIS_ELONGATION
36	Down	0.017386357	0.16510648	GO_NEURON_PROJECTION_MEMBRANE
68	Up	0.017412093	0.16510648	GO_AMINOGLYCAN_CATABOLIC_PROCESS
125	Down	0.017431774	0.16510648	GO_REGULATION_OF_G_PROTEIN_COUPLED_RECEPTOR_PROTEIN_SIGNALING_PATHWAY
147	Down	0.017497323	0.165473146	GO_TRANSPORT_VESICLE_MEMBRANE
136	Up	0.017601922	0.166207428	GO_MAINTENANCE_OF_LOCATION
361	Down	0.01773973	0.167052957	GO_PROTEIN_LOCALIZATION_TO_MEMBRANE
10	Down	0.017745651	0.167052957	GO_GDP_DISSOCIATION_INHIBITOR_ACTIVITY
53	Down	0.017777703	0.167099565	GO_CYTOSOLIC_LARGE_RIBOSOMAL_SUBUNIT
28	Up	0.017881824	0.167694266	GO_RESPONSE_TO_COPPER_ION
19	Up	0.017895366	0.167694266	GO_ALDEHYDE_DEHYDROGENASE_NAD_ACTIVITY
39	Down	0.017999233	0.16801756	GO_PEPTIDYL_ASPARAGINE_MODIFICATION
11	Down	0.018049462	0.16801756	GO_RNA_CAP_BINDING
81	Up	0.018071138	0.16801756	GO_KERATIN_FILAMENT
27	Down	0.018108511	0.16801756	GO_NEGATIVE_REGULATION_OF_DENDRITE_DEVELOPMENT
60	Up	0.018111608	0.16801756	GO_OLIGODENDROCYTE_DIFFERENTIATION
18	Up	0.018114738	0.16801756	GO_NEGATIVE_REGULATION_OF_BIOMINERAL_TISSUE_DEVELOPMENT
23	Down	0.018120609	0.16801756	GO_COPI_COATED_VESICLE
17	Down	0.018149469	0.16803247	GO_RESPIRATORY_CHAIN_COMPLEX_IV_ASSEMBLY
90	Up	0.018317418	0.169333133	GO_SERINE_TYPE_ENDOPEPTIDASE_INHIBITOR_ACTIVITY
61	Down	0.018498137	0.170256415	GO_GLYCOLIPID_BIOSYNTHETIC_PROCESS
73	Up	0.018532309	0.170256415	GO_CELL_CELL_JUNCTION_ASSEMBLY
15	Up	0.01853899	0.170256415	GO_CELLULAR_RESPONSE_TO_CADMIUM_ION
88	Up	0.018578942	0.170256415	GO_DORSAL_VENTRAL_PATTERN_FORMATION
62	Down	0.018689668	0.170256415	GO_CALCIUM_CHANNEL_COMPLEX
63	Down	0.018691781	0.170256415	GO_CLATHRIN_BINDING
549	Down	0.018693609	0.170256415	GO_REGULATION_OF_CELL_PROJECTION_ORGANIZATION
54	Up	0.018702013	0.170256415	GO_PLATELET_ALPHA_GRANULE_LUMEN
45	Up	0.018742989	0.170256415	GO_EXOCRINE_SYSTEM_DEVELOPMENT
23	Up	0.018748639	0.170256415	GO_MACROMOLECULAR_COMPLEX_REMODELING
23	Up	0.018748639	0.170256415	GO_PLASMA_LIPOPROTEIN_PARTICLE_REMODELING
23	Up	0.018748639	0.170256415	GO_PROTEIN_LIPID_COMPLEX_REMODELING
28	Down	0.018782251	0.170310823	GO_S_ACYLTRANSFERASE_ACTIVITY
118	Down	0.018841811	0.170600006	GO_RNA_POLYMERASE_COMPLEX
259	Down	0.019072223	0.172207116	GO_POSITIVE_REGULATION_OF_PROTEIN_CATABOLIC_PROCESS
37	Down	0.019075164	0.172207116	GO_PHOSPHATASE_INHIBITOR_ACTIVITY
157	Up	0.019109686	0.172266555	GO_HUMORAL_IMMUNE_RESPONSE
441	Up	0.019195368	0.172636339	GO_INFLAMMATORY_RESPONSE
26	Down	0.019206703	0.172636339	GO_PROTEIN_K11_LINKED_UBIQUITINATION
10	Down	0.019368937	0.173841146	GO_RIBONUCLEASE_P_ACTIVITY
865	Down	0.019430445	0.174139713	GO_SINGLE_ORGANISM_CELLULAR_LOCALIZATION
841	Down	0.019486058	0.174256511	GO_PROTEIN_MODIFICATION_BY_SMALL_PROTEIN_CONJUGATION_OR_REMOVAL
29	Down	0.019499999	0.174256511	GO_FEAR_RESPONSE
16	Down	0.019546914	0.174422966	GO_DENDRITE_CYTOPLASM
59	Up	0.019616047	0.174786915	GO_T_CELL_ACTIVATION_INVOLVED_IN_IMMUNE_RESPONSE
23	Up	0.019660563	0.174822409	GO_POSITIVE_REGULATION_OF_STEROID_METABOLIC_PROCESS
14	Up	0.019676736	0.174822409	GO_WATER_TRANSMEMBRANE_TRANSPORTER_ACTIVITY
45	Up	0.019790275	0.175578184	GO_REGULATION_OF_EPIDERMAL_CELL_DIFFERENTIATION
12	Down	0.019832478	0.175699799	GO_CULLIN_FAMILY_PROTEIN_BINDING
70	Up	0.019893769	0.175989081	GO_CELL_FATE_SPECIFICATION
61	Down	0.019922215	0.175989081	GO_MEMBRANE_DEPOLARIZATION
607	Down	0.019951052	0.17599168	GO_NEGATIVE_REGULATION_OF_PROTEIN_MODIFICATION_PROCESS
21	Down	0.020010912	0.176200782	GO_CEREBELLAR_CORTEX_FORMATION
364	Down	0.020062544	0.176200782	GO_GLYCOSYL_COMPOUND_METABOLIC_PROCESS
13	Up	0.020086438	0.176200782	GO_NEGATIVE_REGULATION_OF_SKELETAL_MUSCLE_TISSUE_DEVELOPMENT
12	Up	0.020101194	0.176200782	GO_RENAL_ABSORPTION
185	Up	0.020125218	0.176200782	GO_EPITHELIAL_CELL_DEVELOPMENT
14	Down	0.020187155	0.176200782	GO_G_PROTEIN_COUPLED_NEUROTRANSMITTER_RECEPTOR_ACTIVITY
133	Up	0.020224147	0.176200782	GO_POSITIVE_REGULATION_OF_VASCULATURE_DEVELOPMENT
11	Down	0.020227388	0.176200782	GO_NEGATIVE_REGULATION_OF_NEUROTRANSMITTER_SECRETION
372	Down	0.020231942	0.176200782	GO_NCRNA_PROCESSING
34	Down	0.020277115	0.176345125	GO_TRANSCRIPTION_FROM_RNA_POLYMERASE_I_PROMOTER
78	Up	0.020329471	0.176551438	GO_RENAL_TUBULE_DEVELOPMENT
32	Down	0.020367318	0.176631337	GO_POSITIVE_REGULATION_OF_AMINE_TRANSPORT
28	Up	0.020472563	0.177046036	GO_ACYLGLYCEROL_HOMEOSTASIS
28	Up	0.020472563	0.177046036	GO_TRIGLYCERIDE_HOMEOSTASIS
18	Up	0.020550974	0.177296971	GO_PROTEIN_HYDROXYLATION
37	Down	0.020559088	0.177296971	GO_CAMP_MEDIATED_SIGNALING
21	Up	0.020684839	0.178132289	GO_MRNA_TRANSCRIPTION
15	Up	0.020715646	0.178148781	GO_CILIUM_OR_FLAGELLUM_DEPENDENT_CELL_MOTILITY
407	Down	0.020890517	0.179402407	GO_ORGANELLE_LOCALIZATION
28	Down	0.020940606	0.179508264	GO_REGULATION_OF_SYNAPTIC_TRANSMISSION_GABAERGIC
30	Down	0.020981833	0.179508264	GO_DOPAMINE_RECEPTOR_SIGNALING_PATHWAY
11	Up	0.020990181	0.179508264	GO_URETER_DEVELOPMENT
66	Down	0.021033365	0.179619883	GO_ACID_SECRETION
11	Up	0.021082652	0.179619883	GO_REGULATION_OF_ODONTOGENESIS_OF_DENTIN_CONTAINING_TOOTH
96	Down	0.021090625	0.179619883	GO_NEUROPEPTIDE_SIGNALING_PATHWAY
15	Up	0.021151388	0.179888904	GO_EPITHELIAL_CELL_MATURATION
16	Down	0.021212382	0.180159153	GO_NEGATIVE_REGULATION_OF_NEUROTRANSMITTER_TRANSPORT
205	Up	0.021286758	0.180542156	GO_DEFENSE_RESPONSE_TO_BACTERIUM
19	Up	0.021344731	0.180785184	GO_WATER_TRANSPORT
571	Up	0.021403897	0.180813324	GO_INNATE_IMMUNE_RESPONSE
37	Down	0.021406702	0.180813324	GO_VIRION_ASSEMBLY
21	Down	0.021478406	0.181170792	GO_U4_U6_X_U5_TRI_SNRNP_COMPLEX
19	Up	0.021599228	0.18194104	GO_POSITIVE_REGULATION_OF_TRIGLYCERIDE_METABOLIC_PROCESS
23	Up	0.021759275	0.183039142	GO_REGULATION_OF_ANTIGEN_PROCESSING_AND_PRESENTATION
95	Down	0.021897104	0.183947606	GO_POSITIVE_REGULATION_OF_PROTEASOMAL_PROTEIN_CATABOLIC_PROCESS
174	Down	0.021948732	0.184130455	GO_TRNA_METABOLIC_PROCESS
318	Down	0.021983008	0.184167431	GO_GATED_CHANNEL_ACTIVITY
22	Down	0.022089836	0.184608141	GO_ACTIVATION_OF_PROTEIN_KINASE_B_ACTIVITY
38	Down	0.022095493	0.184608141	GO_CYTOPLASMIC_TRANSLATION
31	Down	0.022134014	0.18467974	GO_NUCLEAR_TRANSCRIBED_MRNA_CATABOLIC_PROCESS_EXONUCLEOLYTIC
34	Up	0.022279979	0.185646416	GO_NEGATIVE_REGULATION_OF_EXTRINSIC_APOPTOTIC_SIGNALING_PATHWAY_VIA_DEATH_DOMAIN_RECEPTORS
50	Down	0.022387574	0.186291202	GO_RESPONSE_TO_NICOTINE
16	Down	0.022441623	0.186308023	GO_DNA_DIRECTED_RNA_POLYMERASE_II_CORE_COMPLEX
114	Up	0.022450026	0.186308023	GO_NEPHRON_DEVELOPMENT
36	Down	0.022603267	0.187327617	GO_ATP_BIOSYNTHETIC_PROCESS
65	Down	0.022637553	0.187359936	GO_OLIGOSACCHARIDE_METABOLIC_PROCESS
17	Down	0.022747332	0.187966567	GO_PSEUDOURIDINE_SYNTHESIS
15	Down	0.022771817	0.187966567	GO_OLFACTORY_BULB_INTERNEURON_DIFFERENTIATION
13	Down	0.023044787	0.189964292	GO_UBIQUINONE_METABOLIC_PROCESS
20	Up	0.02309545	0.189964292	GO_COPPER_ION_TRANSPORT
141	Down	0.023106263	0.189964292	GO_T_CELL_RECEPTOR_SIGNALING_PATHWAY
62	Down	0.023159031	0.190015658	GO_ENDOSOME_ORGANIZATION
118	Down	0.023174145	0.190015658	GO_POSITIVE_REGULATION_OF_CANONICAL_WNT_SIGNALING_PATHWAY
24	Up	0.023221996	0.190086589	GO_BLOOD_COAGULATION_FIBRIN_CLOT_FORMATION
14	Down	0.023244452	0.190086589	GO_CDP_DIACYLGLYCEROL_METABOLIC_PROCESS
17	Down	0.023359953	0.190709669	GO_RRNA_TRANSCRIPTION
122	Up	0.023382502	0.190709669	GO_GROWTH_FACTOR_BINDING
63	Up	0.023504725	0.191214366	GO_REGULATION_OF_REACTIVE_OXYGEN_SPECIES_BIOSYNTHETIC_PROCESS
13	Up	0.02353326	0.191214366	GO_NEGATIVE_REGULATION_OF_HUMORAL_IMMUNE_RESPONSE
22	Up	0.023537415	0.191214366	GO_HYALURONIC_ACID_BINDING
14	Down	0.02362532	0.191623846	GO_DNA_APURINIC_OR_APYRIMIDINIC_SITE_LYASE_ACTIVITY
17	Down	0.023651187	0.191623846	GO_REGULATION_OF_SYNAPTIC_TRANSMISSION_DOPAMINERGIC
22	Up	0.023681053	0.191623846	GO_FIBROBLAST_GROWTH_FACTOR_BINDING
14	Up	0.023918544	0.193291931	GO_REGULATION_OF_FIBRINOLYSIS
748	Down	0.023988594	0.193598185	GO_INTRACELLULAR_PROTEIN_TRANSPORT
47	Down	0.024019236	0.193598185	GO_RIBOSOMAL_LARGE_SUBUNIT_BIOGENESIS
76	Down	0.024062672	0.193695082	GO_NEGATIVE_REGULATION_OF_DEPHOSPHORYLATION
21	Up	0.024114212	0.193856887	GO_SODIUM_INDEPENDENT_ORGANIC_ANION_TRANSMEMBRANE_TRANSPORTER_ACTIVITY
144	Down	0.024229525	0.194530274	GO_PROTEIN_TARGETING_TO_MEMBRANE
43	Down	0.02426798	0.19458565	GO_AUTOPHAGOSOME_ORGANIZATION
167	Down	0.024470516	0.195954811	GO_DIVALENT_INORGANIC_CATION_TRANSMEMBRANE_TRANSPORTER_ACTIVITY
17	Up	0.024515824	0.196062996	GO_OXIDOREDUCTASE_ACTIVITY_ACTING_ON_THE_CH_NH_GROUP_OF_DONORS_NAD_OR_NADP_AS_ACCEPTOR
101	Up	0.024683036	0.197144562	GO_CENTRIOLE
52	Down	0.024862246	0.198319025	GO_RIBONUCLEOSIDE_TRIPHOSPHATE_BIOSYNTHETIC_PROCESS
13	Up	0.024992444	0.199100015	GO_PHOSPHOLIPASE_INHIBITOR_ACTIVITY
160	Up	0.025078651	0.199275881	GO_DEFENSE_RESPONSE_TO_VIRUS
23	Up	0.025079157	0.199275881	GO_AMMONIUM_TRANSMEMBRANE_TRANSPORT
873	Down	0.025174688	0.199491376	GO_GOLGI_APPARATUS_PART
382	Down	0.025180767	0.199491376	GO_PROTEIN_TARGETING
20	Up	0.025203338	0.199491376	GO_INTERMEDIATE_FILAMENT_ORGANIZATION
167	Up	0.025289611	0.199732423	GO_MORPHOGENESIS_OF_A_BRANCHING_STRUCTURE
554	Down	0.025298576	0.199732423	GO_PROTEIN_CATABOLIC_PROCESS
206	Up	0.025354671	0.199919308	GO_NEGATIVE_REGULATION_OF_CYTOKINE_PRODUCTION
29	Down	0.025413891	0.200130334	GO_RAN_GTPASE_BINDING
14	Down	0.025656381	0.201782204	GO_POSITIVE_REGULATION_OF_CATECHOLAMINE_SECRETION
11	Down	0.025704823	0.201905654	GO_PROTEIN_CHANNEL_ACTIVITY
128	Down	0.025747126	0.201980636	GO_CALCIUM_ION_TRANSMEMBRANE_TRANSPORTER_ACTIVITY
88	Up	0.025828657	0.202249596	GO_B_CELL_DIFFERENTIATION
56	Down	0.025847013	0.202249596	GO_CYCLIC_NUCLEOTIDE_METABOLIC_PROCESS
26	Down	0.025946207	0.202623564	GO_ESCRT_COMPLEX
18	Down	0.02596992	0.202623564	GO_REGULATION_OF_MITOCHONDRIAL_FISSION
14	Up	0.025993389	0.202623564	GO_POSITIVE_REGULATION_OF_HISTONE_DEACETYLATION
527	Down	0.026157539	0.203645687	GO_NUCLEOBASE_CONTAINING_SMALL_MOLECULE_METABOLIC_PROCESS
99	Down	0.026348476	0.204873521	GO_PEPTIDYL_TYROSINE_DEPHOSPHORYLATION
212	Up	0.026593324	0.206516923	GO_CYTOKINE_ACTIVITY
167	Down	0.026792972	0.20780562	GO_REGULATION_OF_AXONOGENESIS
38	Up	0.026855598	0.208029671	GO_ATP_GENERATION_FROM_ADP
352	Up	0.026913363	0.20813906	GO_PROTEINACEOUS_EXTRACELLULAR_MATRIX
247	Up	0.026993725	0.20813906	GO_EPIDERMIS_DEVELOPMENT
55	Up	0.027004743	0.20813906	GO_STEROL_HOMEOSTASIS
55	Up	0.027004743	0.20813906	GO_CHOLESTEROL_HOMEOSTASIS
19	Down	0.027049163	0.208221147	GO_RAC_PROTEIN_SIGNAL_TRANSDUCTION
10	Down	0.027151983	0.208752032	GO_POSITIVE_REGULATION_OF_NFAT_PROTEIN_IMPORT_INTO_NUCLEUS
196	Down	0.027328729	0.209420971	GO_REGULATION_OF_TRANSPORTER_ACTIVITY
20	Down	0.027340883	0.209420971	GO_DOLICHOL_LINKED_OLIGOSACCHARIDE_BIOSYNTHETIC_PROCESS
20	Down	0.027340883	0.209420971	GO_OLIGOSACCHARIDE_LIPID_INTERMEDIATE_BIOSYNTHETIC_PROCESS
45	Down	0.027472248	0.20973401	GO_CYCLIC_NUCLEOTIDE_MEDIATED_SIGNALING
14	Up	0.027477199	0.20973401	GO_POSITIVE_REGULATION_OF_CELL_SIZE
13	Up	0.02749204	0.20973401	GO_NEGATIVE_REGULATION_OF_MACROPHAGE_DERIVED_FOAM_CELL_DIFFERENTIATION
1304	Up	0.027544908	0.20973401	GO_EXTRACELLULAR_SPACE
25	Up	0.027551824	0.20973401	GO_REGULATION_OF_CELL_FATE_COMMITMENT
16	Down	0.027642831	0.209920285	GO_ADRENERGIC_RECEPTOR_ACTIVITY
1027	Up	0.027702964	0.209920285	GO_IMMUNE_RESPONSE
111	Down	0.027708816	0.209920285	GO_ION_CHANNEL_BINDING
82	Up	0.027712474	0.209920285	GO_KIDNEY_MORPHOGENESIS
13	Down	0.027770064	0.210098422	GO_RNA_CAP_BINDING_COMPLEX
17	Up	0.027844979	0.210407039	GO_ANTIGEN_PROCESSING_AND_PRESENTATION_OF_ENDOGENOUS_ANTIGEN
62	Up	0.028033856	0.211496434	GO_RESPONSE_TO_OSMOTIC_STRESS
261	Down	0.028057749	0.211496434	GO_GLYCOSYLATION
98	Up	0.028162108	0.211885522	GO_REGULATION_OF_PRODUCTION_OF_MOLECULAR_MEDIATOR_OF_IMMUNE_RESPONSE
863	Down	0.028178094	0.211885522	GO_NEURON_DIFFERENTIATION
44	Down	0.028378271	0.213130841	GO_REGULATION_OF_RELEASE_OF_CYTOCHROME_C_FROM_MITOCHONDRIA
87	Down	0.028556335	0.214207256	GO_VOLTAGE_GATED_POTASSIUM_CHANNEL_ACTIVITY
42	Up	0.028608483	0.214337678	GO_INTERMEDIATE_FILAMENT_BASED_PROCESS
12	Down	0.028710412	0.214840292	GO_GOLGI_LOCALIZATION
45	Down	0.028862243	0.215240394	GO_SCAFFOLD_PROTEIN_BINDING
110	Down	0.028899182	0.215240394	GO_PROTEIN_LOCALIZATION_TO_ENDOPLASMIC_RETICULUM
13	Down	0.028963237	0.215240394	GO_POSITIVE_REGULATION_OF_MUSCLE_CELL_APOPTOTIC_PROCESS
45	Down	0.028984297	0.215240394	GO_POSITIVE_REGULATION_OF_RECEPTOR_ACTIVITY
17	Down	0.029041977	0.215240394	GO_RIBONUCLEOSIDE_BISPHOSPHATE_BIOSYNTHETIC_PROCESS
17	Down	0.029041977	0.215240394	GO_PURINE_NUCLEOSIDE_BISPHOSPHATE_BIOSYNTHETIC_PROCESS
17	Down	0.029041977	0.215240394	GO_NUCLEOSIDE_BISPHOSPHATE_BIOSYNTHETIC_PROCESS
16	Down	0.029068287	0.215240394	GO_DNA_LIGATION
67	Up	0.029078049	0.215240394	GO_NEGATIVE_REGULATION_OF_OSSIFICATION
40	Up	0.029351496	0.217003989	GO_ENDOCRINE_PANCREAS_DEVELOPMENT
32	Up	0.029524493	0.218021588	GO_SALIVARY_GLAND_DEVELOPMENT
195	Down	0.02957267	0.218025899	GO_TRANSFERASE_ACTIVITY_TRANSFERRING_HEXOSYL_GROUPS
18	Down	0.029595796	0.218025899	GO_PHOSPHOLIPASE_BINDING
35	Down	0.029825068	0.219356327	GO_CARBOHYDRATE_DERIVATIVE_TRANSPORTER_ACTIVITY
14	Down	0.029847544	0.219356327	GO_SLEEP
30	Up	0.02995138	0.219710041	GO_PROTEIN_COMPLEX_INVOLVED_IN_CELL_ADHESION
22	Down	0.029966939	0.219710041	GO_2_IRON_2_SULFUR_CLUSTER_BINDING
40	Up	0.030041995	0.219998743	GO_NEGATIVE_REGULATION_OF_LYMPHOCYTE_DIFFERENTIATION
27	Up	0.03019832	0.220881188	GO_CELL_VOLUME_HOMEOSTASIS
38	Up	0.030289013	0.221282055	GO_REGULATION_OF_TYPE_I_INTERFERON_MEDIATED_SIGNALING_PATHWAY
33	Up	0.030488141	0.222473227	GO_REGULATION_OF_PROTEIN_ACTIVATION_CASCADE
1623	Down	0.03055929	0.222728822	GO_ESTABLISHMENT_OF_LOCALIZATION_IN_CELL
12	Up	0.030673523	0.223057708	GO_POSITIVE_REGULATION_OF_ASTROCYTE_DIFFERENTIATION
40	Down	0.030706895	0.223057708	GO_VOLTAGE_GATED_CALCIUM_CHANNEL_COMPLEX
1377	Down	0.030712941	0.223057708	GO_ESTABLISHMENT_OF_PROTEIN_LOCALIZATION
43	Up	0.030900553	0.22415625	GO_CELL_FATE_DETERMINATION
71	Up	0.030976661	0.224444294	GO_INTRINSIC_APOPTOTIC_SIGNALING_PATHWAY_IN_RESPONSE_TO_DNA_DAMAGE
1020	Down	0.03102399	0.224523382	GO_CATALYTIC_COMPLEX
21	Up	0.031239844	0.225717645	GO_BASAL_LAMINA
27	Up	0.031273933	0.225717645	GO_AMMONIUM_TRANSMEMBRANE_TRANSPORTER_ACTIVITY
25	Up	0.03129883	0.225717645	GO_PHOSPHATIDYLCHOLINE_BIOSYNTHETIC_PROCESS
14	Up	0.031554353	0.22729456	GO_ANTIGEN_PROCESSING_AND_PRESENTATION_OF_ENDOGENOUS_PEPTIDE_ANTIGEN
13	Up	0.031651279	0.227507109	GO_FIBRIL
95	Down	0.031671916	0.227507109	GO_ESTABLISHMENT_OF_LOCALIZATION_BY_MOVEMENT_ALONG_MICROTUBULE
35	Up	0.031694552	0.227507109	GO_ONE_CARBON_METABOLIC_PROCESS
48	Up	0.031818252	0.228015419	GO_POSITIVE_REGULATION_OF_WOUND_HEALING
237	Up	0.031865616	0.228015419	GO_NEGATIVE_REGULATION_OF_PEPTIDASE_ACTIVITY
27	Down	0.031929185	0.228015419	GO_REGULATION_OF_PROTEIN_LOCALIZATION_TO_CELL_SURFACE
30	Down	0.031955622	0.228015419	GO_NUCLEOBASE_CONTAINING_COMPOUND_TRANSMEMBRANE_TRANSPORTER_ACTIVITY
51	Down	0.03199319	0.228015419	GO_G_PROTEIN_COUPLED_AMINE_RECEPTOR_ACTIVITY
389	Down	0.032050689	0.228015419	GO_REGULATION_OF_PROTEIN_CATABOLIC_PROCESS
151	Down	0.032086943	0.228015419	GO_POSITIVE_REGULATION_OF_WNT_SIGNALING_PATHWAY
175	Up	0.032093707	0.228015419	GO_REGULATION_OF_OSSIFICATION
17	Down	0.032098181	0.228015419	GO_ACTIVATION_OF_PROTEIN_KINASE_A_ACTIVITY
994	Down	0.032220047	0.228129719	GO_ORGANONITROGEN_COMPOUND_BIOSYNTHETIC_PROCESS
82	Up	0.032223778	0.228129719	GO_ORGAN_REGENERATION
938	Down	0.032225265	0.228129719	GO_CELL_PROJECTION_PART
30	Up	0.032418347	0.228609509	GO_BROWN_FAT_CELL_DIFFERENTIATION
26	Up	0.032452705	0.228609509	GO_RESPONSE_TO_INTERLEUKIN_6
26	Up	0.032497786	0.228609509	GO_DESMOSOME
46	Down	0.03257491	0.228609509	GO_PEPTIDYL_THREONINE_MODIFICATION
11	Down	0.03263751	0.228609509	GO_REGULATION_OF_MITOCHONDRIAL_TRANSLATION
90	Up	0.032644679	0.228609509	GO_MESONEPHROS_DEVELOPMENT
98	Down	0.032646593	0.228609509	GO_CYTOSOLIC_RIBOSOME
14	Down	0.032663798	0.228609509	GO_SYNAPTIC_VESICLE_CYTOSKELETAL_TRANSPORT
14	Down	0.032663798	0.228609509	GO_ANTEROGRADE_SYNAPTIC_VESICLE_TRANSPORT
14	Down	0.032663798	0.228609509	GO_SYNAPTIC_VESICLE_TRANSPORT_ALONG_MICROTUBULE
20	Down	0.032891377	0.229941305	GO_CELL_DIFFERENTIATION_IN_HINDBRAIN
30	Down	0.03296212	0.230174894	GO_ACETYLCHOLINE_RECEPTOR_ACTIVITY
36	Down	0.033342506	0.232391153	GO_AXO_DENDRITIC_TRANSPORT
11	Down	0.033381994	0.232391153	GO_ENDOLYSOSOME_MEMBRANE
17	Up	0.033392566	0.232391153	GO_LYSINE_ACETYLATED_HISTONE_BINDING
21	Up	0.033570309	0.233036666	GO_INORGANIC_ANION_EXCHANGER_ACTIVITY
16	Up	0.03360328	0.233036666	GO_REVERSE_CHOLESTEROL_TRANSPORT
81	Down	0.033668653	0.233036666	GO_GOLGI_ASSOCIATED_VESICLE
25	Down	0.033673514	0.233036666	GO_GLYCOSPHINGOLIPID_BIOSYNTHETIC_PROCESS
34	Up	0.033684527	0.233036666	GO_ADHERENS_JUNCTION_ASSEMBLY
11	Up	0.033749555	0.233036666	GO_MUSCLE_ATROPHY
82	Down	0.033836683	0.233036666	GO_SNRNA_METABOLIC_PROCESS
148	Up	0.033844081	0.233036666	GO_DIGESTIVE_SYSTEM_DEVELOPMENT
43	Up	0.03385978	0.233036666	GO_CORNIFIED_ENVELOPE
70	Down	0.033863259	0.233036666	GO_CENTRAL_NERVOUS_SYSTEM_NEURON_DEVELOPMENT
91	Down	0.033902481	0.233046486	GO_ESTABLISHMENT_OF_PROTEIN_LOCALIZATION_TO_ENDOPLASMIC_RETICULUM
16	Down	0.033973851	0.233277023	GO_MITOGEN_ACTIVATED_PROTEIN_KINASE_KINASE_BINDING
166	Down	0.034016444	0.233309669	GO_POSITIVE_REGULATION_OF_MITOCHONDRION_ORGANIZATION
35	Down	0.034163064	0.233763534	GO_PROTEIN_K63_LINKED_UBIQUITINATION
32	Down	0.034180327	0.233763534	GO_POSITIVE_REGULATION_OF_TELOMERE_MAINTENANCE_VIA_TELOMERE_LENGTHENING
86	Up	0.034196352	0.233763534	GO_COLLAGEN_TRIMER
14	Up	0.034241732	0.233814525	GO_NEGATIVE_REGULATION_OF_INTERLEUKIN_1_BETA_PRODUCTION
27	Up	0.03428181	0.233829245	GO_HIPPO_SIGNALING
32	Down	0.034539879	0.235329163	GO_GALACTOSYLTRANSFERASE_ACTIVITY
17	Down	0.034681819	0.236035423	GO_NEGATIVE_REGULATION_OF_CIRCADIAN_RHYTHM
62	Up	0.034763591	0.236316541	GO_REGULATION_OF_TISSUE_REMODELING
21	Up	0.034799776	0.236316541	GO_LEFT_RIGHT_PATTERN_FORMATION
22	Up	0.035154164	0.238460481	GO_MAP_KINASE_KINASE_KINASE_ACTIVITY
38	Down	0.035281222	0.238836342	GO_NUCLEOTIDE_EXCISION_REPAIR_DNA_INCISION
15	Up	0.035287043	0.238836342	GO_MRNA_TRANSCRIPTION_FROM_RNA_POLYMERASE_II_PROMOTER
17	Down	0.035366942	0.239114655	GO_PROTON_TRANSPORTING_TWO_SECTOR_ATPASE_COMPLEX_CATALYTIC_DOMAIN
536	Down	0.035532106	0.239534257	GO_NEGATIVE_REGULATION_OF_PHOSPHORUS_METABOLIC_PROCESS
536	Down	0.035532106	0.239534257	GO_NEGATIVE_REGULATION_OF_PHOSPHATE_METABOLIC_PROCESS
16	Down	0.035571565	0.239534257	GO_PHASIC_SMOOTH_MUSCLE_CONTRACTION
452	Down	0.035604	0.239534257	GO_ENZYME_ACTIVATOR_ACTIVITY
32	Up	0.035623243	0.239534257	GO_REGULATION_OF_ORGAN_FORMATION
131	Up	0.035748719	0.240116125	GO_BRANCHING_MORPHOGENESIS_OF_AN_EPITHELIAL_TUBE
37	Down	0.036020064	0.241020032	GO_REGULATION_OF_ACTION_POTENTIAL
11	Up	0.036039648	0.241020032	GO_NEGATIVE_REGULATION_OF_GLYCOLYTIC_PROCESS
11	Up	0.036039648	0.241020032	GO_NEGATIVE_REGULATION_OF_COENZYME_METABOLIC_PROCESS
11	Up	0.036039648	0.241020032	GO_NEGATIVE_REGULATION_OF_COFACTOR_METABOLIC_PROCESS
314	Down	0.036096341	0.241137636	GO_NUCLEOSIDE_TRIPHOSPHATASE_REGULATOR_ACTIVITY
223	Down	0.036303088	0.241996042	GO_CALCIUM_ION_TRANSPORT
56	Down	0.036311806	0.241996042	GO_RRNA_BINDING
108	Up	0.036342578	0.241996042	GO_FORMATION_OF_PRIMARY_GERM_LAYER
12	Up	0.036574584	0.243278193	GO_REGULATION_OF_CHEMOKINE_SECRETION
51	Down	0.037115521	0.24622538	GO_TRNA_AMINOACYLATION
51	Down	0.037115521	0.24622538	GO_AMINO_ACID_ACTIVATION
144	Down	0.037173647	0.24622538	GO_NEGATIVE_REGULATION_OF_MAPK_CASCADE
28	Down	0.037177397	0.24622538	GO_PROTEIN_PHOSPHATASE_2A_BINDING
12	Up	0.037247406	0.246424363	GO_REGULATION_OF_SKELETAL_MUSCLE_CELL_PROLIFERATION
161	Down	0.037342653	0.246789707	GO_NEGATIVE_REGULATION_OF_CANONICAL_WNT_SIGNALING_PATHWAY
36	Down	0.037486957	0.247096937	GO_POSITIVE_REGULATION_OF_CATION_CHANNEL_ACTIVITY
29	Up	0.037496533	0.247096937	GO_SODIUM_ION_HOMEOSTASIS
13	Up	0.03751513	0.247096937	GO_SPINAL_CORD_MOTOR_NEURON_CELL_FATE_SPECIFICATION
16	Up	0.037549437	0.247096937	GO_APOPTOTIC_PROCESS_INVOLVED_IN_MORPHOGENESIS
21	Down	0.03772246	0.247401568	GO_ACTIVIN_RECEPTOR_SIGNALING_PATHWAY
11	Up	0.03776033	0.247401568	GO_REGULATION_OF_CHOLESTEROL_HOMEOSTASIS
56	Up	0.037794169	0.247401568	GO_REGULATION_OF_CYTOKINE_PRODUCTION_INVOLVED_IN_IMMUNE_RESPONSE
65	Up	0.037827342	0.247401568	GO_MESODERM_MORPHOGENESIS
12	Up	0.037840719	0.247401568	GO_FILAMIN_BINDING
36	Up	0.037840803	0.247401568	GO_DEFENSE_RESPONSE_TO_FUNGUS
39	Down	0.037912424	0.247401568	GO_NEGATIVE_REGULATION_OF_G_PROTEIN_COUPLED_RECEPTOR_PROTEIN_SIGNALING_PATHWAY
28	Up	0.037916718	0.247401568	GO_REGULATION_OF_VIRAL_ENTRY_INTO_HOST_CELL
28	Down	0.038135216	0.248564208	GO_ACYLGLYCEROL_O_ACYLTRANSFERASE_ACTIVITY
55	Up	0.038193764	0.248682944	GO_REGULATION_OF_EXTRINSIC_APOPTOTIC_SIGNALING_PATHWAY_VIA_DEATH_DOMAIN_RECEPTORS
32	Up	0.038287329	0.248975285	GO_NEGATIVE_REGULATION_OF_T_CELL_DIFFERENTIATION
15	Up	0.038387122	0.248975285	GO_CHRONIC_INFLAMMATORY_RESPONSE
19	Up	0.038390106	0.248975285	GO_CYCLIN_BINDING
14	Up	0.038410624	0.248975285	GO_BIOACTIVE_LIPID_RECEPTOR_ACTIVITY
116	Down	0.038440557	0.248975285	GO_NEGATIVE_REGULATION_OF_CYTOPLASMIC_TRANSPORT
15	Down	0.038570876	0.249335522	GO_BETA_1_3_GALACTOSYLTRANSFERASE_ACTIVITY
63	Up	0.03857705	0.249335522	GO_REGULATION_OF_EPIDERMIS_DEVELOPMENT
17	Up	0.03896982	0.251610376	GO_DEFINITIVE_HEMOPOIESIS
14	Down	0.039090348	0.252033633	GO_BETA_CATENIN_DESTRUCTION_COMPLEX
38	Down	0.039117124	0.252033633	GO_PROTEIN_PEPTIDYL_PROLYL_ISOMERIZATION
11	Up	0.039237986	0.252273354	GO_LEYDIG_CELL_DIFFERENTIATION
17	Up	0.039276729	0.252273354	GO_DETECTION_OF_OTHER_ORGANISM
12	Up	0.039319063	0.252273354	GO_REGULATION_OF_ENDOTHELIAL_CELL_DEVELOPMENT
12	Up	0.039319063	0.252273354	GO_REGULATION_OF_ESTABLISHMENT_OF_ENDOTHELIAL_BARRIER
29	Down	0.039358898	0.252273354	GO_NEGATIVE_REGULATION_OF_CALCIUM_ION_TRANSMEMBRANE_TRANSPORT
159	Down	0.039423345	0.252424038	GO_CALCIUM_ION_TRANSMEMBRANE_TRANSPORT
336	Down	0.039496257	0.252451831	GO_REGULATION_OF_CELL_MORPHOGENESIS_INVOLVED_IN_DIFFERENTIATION
743	Down	0.039577888	0.252451831	GO_REGULATION_OF_NERVOUS_SYSTEM_DEVELOPMENT
19	Up	0.039595687	0.252451831	GO_RESPONSE_TO_SALT_STRESS
26	Down	0.039627627	0.252451831	GO_ENDORIBONUCLEASE_ACTIVITY_PRODUCING_5_PHOSPHOMONOESTERS
56	Down	0.03970507	0.252451831	GO_INTRINSIC_COMPONENT_OF_GOLGI_MEMBRANE
146	Up	0.039711215	0.252451831	GO_MALE_SEX_DIFFERENTIATION
21	Up	0.039786812	0.252451831	GO_CALCIUM_INDEPENDENT_CELL_CELL_ADHESION_VIA_PLASMA_MEMBRANE_CELL_ADHESION_MOLECULES
19	Up	0.039796169	0.252451831	GO_NEGATIVE_REGULATION_OF_NUCLEOSIDE_METABOLIC_PROCESS
19	Up	0.039796169	0.252451831	GO_NEGATIVE_REGULATION_OF_ATP_METABOLIC_PROCESS
40	Down	0.039875066	0.252692353	GO_RECYCLING_ENDOSOME_MEMBRANE
58	Down	0.039940863	0.25282405	GO_MICROBODY_MEMBRANE
17	Down	0.040028853	0.25282405	GO_NUCLEAR_ENVELOPE_REASSEMBLY
15	Down	0.040079012	0.25282405	GO_REGULATION_OF_TRANSLATIONAL_FIDELITY
13	Up	0.040106427	0.25282405	GO_CELLULAR_WATER_HOMEOSTASIS
86	Up	0.040130605	0.25282405	GO_TRANSCRIPTIONAL_REPRESSOR_ACTIVITY_RNA_POLYMERASE_II_TRANSCRIPTION_FACTOR_BINDING
30	Down	0.040141866	0.25282405	GO_DISULFIDE_OXIDOREDUCTASE_ACTIVITY
121	Up	0.040335579	0.253784878	GO_REGULATION_OF_EPITHELIAL_CELL_DIFFERENTIATION
44	Up	0.040469211	0.254172176	GO_REGULATION_OF_PLASMA_LIPOPROTEIN_PARTICLE_LEVELS
23	Up	0.040479578	0.254172176	GO_SODIUM_INDEPENDENT_ORGANIC_ANION_TRANSPORT
109	Down	0.040949163	0.256859142	GO_ELECTRON_CARRIER_ACTIVITY
93	Down	0.041044606	0.257196179	GO_DNA_DIRECTED_RNA_POLYMERASE_II_HOLOENZYME
37	Up	0.041126501	0.257447719	GO_COLLAGEN_FIBRIL_ORGANIZATION
87	Up	0.041213475	0.257534459	GO_TISSUE_REMODELING
89	Up	0.041223891	0.257534459	GO_ANTIGEN_BINDING
35	Up	0.041471398	0.25881846	GO_EMBRYONIC_CAMERA_TYPE_EYE_DEVELOPMENT
18	Down	0.04157817	0.259222444	GO_GANGLIOSIDE_BIOSYNTHETIC_PROCESS
250	Down	0.041749484	0.260027597	GO_ESTABLISHMENT_OF_PROTEIN_LOCALIZATION_TO_MEMBRANE
11	Up	0.041907821	0.260437803	GO_VENTRAL_SPINAL_CORD_INTERNEURON_SPECIFICATION
11	Up	0.041907821	0.260437803	GO_CELL_FATE_SPECIFICATION_INVOLVED_IN_PATTERN_SPECIFICATION
338	Down	0.041942059	0.260437803	GO_CELLULAR_PROTEIN_COMPLEX_ASSEMBLY
869	Down	0.042061297	0.260915448	GO_ORGANOPHOSPHATE_METABOLIC_PROCESS
274	Down	0.042197955	0.261500091	GO_TRANSFERASE_ACTIVITY_TRANSFERRING_GLYCOSYL_GROUPS
13	Up	0.042294798	0.261837072	GO_NEGATIVE_REGULATION_OF_ATPASE_ACTIVITY
45	Up	0.042391909	0.262175036	GO_VENTRICULAR_CARDIAC_MUSCLE_TISSUE_DEVELOPMENT
25	Down	0.042521087	0.262710444	GO_CUL4_RING_E3_UBIQUITIN_LIGASE_COMPLEX
277	Down	0.042682846	0.263316667	GO_MACROAUTOPHAGY
36	Down	0.042704617	0.263316667	GO_NEUROMUSCULAR_JUNCTION_DEVELOPMENT
45	Up	0.042856897	0.263991637	GO_CELLULAR_IRON_ION_HOMEOSTASIS
36	Down	0.042981789	0.264496718	GO_TOXIN_TRANSPORT
24	Up	0.04319933	0.265008341	GO_SPINAL_CORD_PATTERNING
366	Down	0.0432284	0.265008341	GO_PHOSPHORIC_ESTER_HYDROLASE_ACTIVITY
45	Up	0.043250831	0.265008341	GO_NEGATIVE_REGULATION_OF_CYTOKINE_SECRETION
36	Down	0.043273057	0.265008341	GO_SPLICEOSOMAL_SNRNP_ASSEMBLY
17	Up	0.043279825	0.265008341	GO_LIPASE_INHIBITOR_ACTIVITY
33	Down	0.043463038	0.265578121	GO_PHOSPHATIDYLSERINE_BINDING
147	Down	0.043463348	0.265578121	GO_REGULATION_OF_PROTEASOMAL_UBIQUITIN_DEPENDENT_PROTEIN_CATABOLIC_PROCESS
23	Down	0.04357537	0.265578121	GO_MATING_BEHAVIOR
23	Down	0.04357537	0.265578121	GO_MULTI_ORGANISM_REPRODUCTIVE_BEHAVIOR
89	Up	0.043589371	0.265578121	GO_CYTOKINE_RECEPTOR_ACTIVITY
16	Down	0.043695081	0.265578121	GO_PROTEIN_KINASE_C_ACTIVITY
23	Up	0.043717267	0.265578121	GO_POSITIVE_REGULATION_OF_EPITHELIAL_CELL_APOPTOTIC_PROCESS
33	Up	0.043717449	0.265578121	GO_BASAL_PLASMA_MEMBRANE
29	Up	0.043844372	0.265934305	GO_TASTE_RECEPTOR_ACTIVITY
75	Up	0.04386234	0.265934305	GO_EXTRACELLULAR_MATRIX_STRUCTURAL_CONSTITUENT
56	Up	0.044052836	0.2667387	GO_POSITIVE_REGULATION_OF_EPITHELIAL_CELL_DIFFERENTIATION
24	Down	0.044081533	0.2667387	GO_NUCLEOTIDE_EXCISION_REPAIR_DNA_GAP_FILLING
11	Up	0.044142812	0.266847627	GO_REGULATION_OF_MYOBLAST_PROLIFERATION
27	Up	0.044243423	0.267193873	GO_NECROTIC_CELL_DEATH
288	Down	0.044330409	0.267457242	GO_GTPASE_BINDING
19	Down	0.044484696	0.26787122	GO_TBP_CLASS_PROTEIN_BINDING
83	Down	0.044498791	0.26787122	GO_REGULATION_OF_POTASSIUM_ION_TRANSPORT
1944	Down	0.044529355	0.26787122	GO_PHOSPHATE_CONTAINING_COMPOUND_METABOLIC_PROCESS
11	Up	0.044736897	0.268857413	GO_HYDROLASE_ACTIVITY_ACTING_ON_ETHER_BONDS
14	Down	0.044935603	0.269697149	GO_SUMO_BINDING
51	Up	0.044964105	0.269697149	GO_EXTRACELLULAR_MATRIX_BINDING
12	Down	0.045126758	0.270409706	GO_GLYCEROPHOSPHOLIPID_CATABOLIC_PROCESS
28	Up	0.045178549	0.270457219	GO_FIBRONECTIN_BINDING
355	Down	0.045248976	0.270616087	GO_FOREBRAIN_DEVELOPMENT
48	Down	0.04532859	0.270829541	GO_RESPONSE_TO_AMINE
14	Down	0.045397046	0.270975976	GO_NEUREXIN_FAMILY_PROTEIN_BINDING
69	Up	0.045613531	0.272004864	GO_PERIPHERAL_NERVOUS_SYSTEM_DEVELOPMENT
58	Down	0.045691159	0.272204527	GO_POSITIVE_REGULATION_OF_ANION_TRANSPORT
15	Up	0.04577797	0.272329154	GO_MORPHOGENESIS_OF_AN_EPITHELIAL_FOLD
17	Down	0.04584073	0.272329154	GO_REGULATION_OF_PLATELET_AGGREGATION
23	Up	0.045882412	0.272329154	GO_REGULATION_OF_ANOIKIS
1166	Up	0.045888743	0.272329154	GO_DEFENSE_RESPONSE
13	Up	0.046002377	0.272741016	GO_PLATELET_DENSE_GRANULE_LUMEN
104	Up	0.046110383	0.273118752	GO_PLATELET_DEGRANULATION
36	Up	0.046364638	0.274210688	GO_DRUG_METABOLIC_PROCESS
443	Up	0.046410548	0.274210688	GO_SENSORY_PERCEPTION_OF_CHEMICAL_STIMULUS
32	Down	0.046448689	0.274210688	GO_AXON_CYTOPLASM
42	Down	0.046472619	0.274210688	GO_VOLTAGE_GATED_CALCIUM_CHANNEL_ACTIVITY
23	Up	0.046566728	0.274241112	GO_DISRUPTION_OF_CELLS_OF_OTHER_ORGANISM
23	Up	0.046566728	0.274241112	GO_KILLING_OF_CELLS_OF_OTHER_ORGANISM
315	Up	0.046777051	0.275216885	GO_RESPONSE_TO_MOLECULE_OF_BACTERIAL_ORIGIN
232	Up	0.046822672	0.275222687	GO_REGULATION_OF_VASCULATURE_DEVELOPMENT
294	Down	0.046947368	0.275403373	GO_CATION_CHANNEL_ACTIVITY
17	Up	0.04700484	0.275403373	GO_VENTRAL_SPINAL_CORD_INTERNEURON_DIFFERENTIATION
31	Up	0.047020407	0.275403373	GO_POSITIVE_REGULATION_OF_IMMUNOGLOBULIN_PRODUCTION
510	Down	0.047051011	0.275403373	GO_CELL_MORPHOGENESIS_INVOLVED_IN_DIFFERENTIATION
16	Up	0.047112974	0.275403373	GO_PTERIDINE_CONTAINING_COMPOUND_BIOSYNTHETIC_PROCESS
69	Up	0.047135496	0.275403373	GO_MUSCLE_ORGAN_MORPHOGENESIS
46	Up	0.047166066	0.275403373	GO_ADP_METABOLIC_PROCESS
38	Up	0.04723214	0.275528266	GO_REGULATION_OF_MULTICELLULAR_ORGANISMAL_METABOLIC_PROCESS
25	Up	0.047347451	0.275939868	GO_FOREBRAIN_REGIONALIZATION
79	Up	0.047483169	0.276469518	GO_VITAMIN_BINDING
349	Down	0.047551921	0.276608626	GO_WNT_SIGNALING_PATHWAY
867	Down	0.047653988	0.276721342	GO_MEMBRANE_ORGANIZATION
36	Down	0.04773027	0.276721342	GO_REGULATION_OF_ERYTHROCYTE_DIFFERENTIATION
81	Down	0.047732389	0.276721342	GO_CARDIAC_CONDUCTION
39	Up	0.047750812	0.276721342	GO_SPLEEN_DEVELOPMENT
99	Down	0.047891103	0.276984818	GO_METENCEPHALON_DEVELOPMENT
15	Up	0.047981674	0.276984818	GO_CELLULAR_RESPONSE_TO_NITRIC_OXIDE
85	Down	0.048009265	0.276984818	GO_REGULATION_OF_CHROMOSOME_SEGREGATION
14	Down	0.048015451	0.276984818	GO_BETA_AMYLOID_METABOLIC_PROCESS
268	Down	0.048020884	0.276984818	GO_DIVALENT_INORGANIC_CATION_TRANSPORT
125	Up	0.048095989	0.277158755	GO_NEGATIVE_REGULATION_OF_HEMOPOIESIS
14	Down	0.048295316	0.277832239	GO_PROTEASOME_ASSEMBLY
9	Up	0.048302978	0.277832239	GO_LYSOZYME_ACTIVITY
14	Down	0.04885589	0.280642272	GO_PEPTIDYL_ARGININE_METHYLATION
12	Down	0.04888255	0.280642272	GO_MATURATION_OF_LSU_RRNA
124	Down	0.048975571	0.280879436	GO_NEGATIVE_REGULATION_OF_PROTEIN_SERINE_THREONINE_KINASE_ACTIVITY
29	Down	0.049014965	0.280879436	GO_POSITIVE_REGULATION_OF_TOR_SIGNALING
93	Up	0.049410804	0.2826433	GO_ALPHA_AMINO_ACID_CATABOLIC_PROCESS
30	Down	0.049414446	0.2826433	GO_GLOBAL_GENOME_NUCLEOTIDE_EXCISION_REPAIR
64	Down	0.049523131	0.283002434	GO_NUCLEOSIDE_TRIPHOSPHATE_BIOSYNTHETIC_PROCESS
15	Up	0.04966327	0.283540485	GO_RESPONSE_TO_MURAMYL_DIPEPTIDE
55	Up	0.049911212	0.284692442	GO_NEGATIVE_REGULATION_OF_MUSCLE_CELL_DIFFERENTIATION
19	Up	0.050196148	0.286053094	GO_OXIDOREDUCTASE_ACTIVITY_ACTING_ON_THE_CH_NH2_GROUP_OF_DONORS
11	Down	0.050336777	0.286506164	GO_REGULATION_OF_ESTABLISHMENT_OF_PROTEIN_LOCALIZATION_TO_CHROMOSOME
14	Down	0.050368583	0.286506164	GO_CELLULAR_RESPONSE_TO_ELECTRICAL_STIMULUS
305	Down	0.050480883	0.28685889	GO_ORGANELLE_SUBCOMPARTMENT
19	Up	0.050523638	0.28685889	GO_REGULATION_OF_INTERLEUKIN_8_SECRETION
17	Up	0.050636291	0.287192603	GO_REGULATION_OF_ENDOTHELIAL_CELL_CHEMOTAXIS
100	Down	0.050675568	0.287192603	GO_LIMBIC_SYSTEM_DEVELOPMENT
45	Down	0.050739066	0.28728841	GO_PROTEIN_TYROSINE_SERINE_THREONINE_PHOSPHATASE_ACTIVITY
548	Down	0.05083595	0.287409276	GO_REGULATION_OF_NEURON_DIFFERENTIATION
9	Up	0.050894239	0.287409276	GO_REGULATION_OF_REMOVAL_OF_SUPEROXIDE_RADICALS
13	Down	0.050900248	0.287409276	GO_RRNA_3_END_PROCESSING
16	Up	0.051094029	0.288239511	GO_ORGAN_INDUCTION
14	Down	0.051189643	0.288268891	GO_NUCLEOSIDE_TRANSMEMBRANE_TRANSPORTER_ACTIVITY
40	Down	0.05119274	0.288268891	GO_CIS_TRANS_ISOMERASE_ACTIVITY
41	Up	0.051376184	0.28876206	GO_PROSTATE_GLAND_DEVELOPMENT
17	Up	0.051420427	0.28876206	GO_NEGATIVE_REGULATION_OF_LIPID_STORAGE
91	Down	0.0514525	0.28876206	GO_POSITIVE_REGULATION_OF_VIRAL_PROCESS
14	Down	0.051622327	0.28876206	GO_TRANSLATION_PREINITIATION_COMPLEX
20	Down	0.051634105	0.28876206	GO_GMP_METABOLIC_PROCESS
19	Down	0.051642646	0.28876206	GO_POSITIVE_REGULATION_OF_PROTEIN_DEPOLYMERIZATION
19	Down	0.051683221	0.28876206	GO_VENTRICULAR_CARDIAC_MUSCLE_CELL_DIFFERENTIATION
298	Up	0.051699186	0.28876206	GO_UROGENITAL_SYSTEM_DEVELOPMENT
26	Up	0.051701802	0.28876206	GO_POSITIVE_REGULATION_OF_VASCULAR_ENDOTHELIAL_GROWTH_FACTOR_PRODUCTION
27	Up	0.051837581	0.289042187	GO_METALLOCARBOXYPEPTIDASE_ACTIVITY
489	Up	0.051845712	0.289042187	GO_RESPONSE_TO_BACTERIUM
137	Down	0.051929228	0.289079055	GO_REGULATION_OF_RNA_STABILITY
39	Up	0.051970101	0.289079055	GO_APICAL_JUNCTION_ASSEMBLY
101	Up	0.051992973	0.289079055	GO_REGULATION_OF_TUMOR_NECROSIS_FACTOR_SUPERFAMILY_CYTOKINE_PRODUCTION
18	Down	0.052135723	0.289611595	GO_UBIQUITIN_DEPENDENT_PROTEIN_CATABOLIC_PROCESS_VIA_THE_MULTIVESICULAR_BODY_SORTING_PATHWAY
83	Down	0.052331218	0.290435903	GO_PROTEOGLYCAN_METABOLIC_PROCESS
19	Up	0.05245368	0.290797262	GO_TETRAHYDROFOLATE_METABOLIC_PROCESS
400	Down	0.052490651	0.290797262	GO_SIGNAL_TRANSDUCTION_BY_PROTEIN_PHOSPHORYLATION
25	Up	0.052617454	0.291238083	GO_EPITHELIAL_TUBE_BRANCHING_INVOLVED_IN_LUNG_MORPHOGENESIS
689	Down	0.052784687	0.291901685	GO_TRANSFERASE_COMPLEX
24	Down	0.052837391	0.291931318	GO_ISOPRENOID_BIOSYNTHETIC_PROCESS
34	Up	0.053062656	0.292913464	GO_NEURAL_TUBE_PATTERNING
105	Down	0.053156369	0.29316831	GO_DRUG_BINDING
48	Up	0.053301373	0.293282934	GO_REGULATION_OF_STEROID_BIOSYNTHETIC_PROCESS
49	Up	0.053319846	0.293282934	GO_STAT_CASCADE
49	Up	0.053319846	0.293282934	GO_JAK_STAT_CASCADE
13	Up	0.053451518	0.29374515	GO_PEPTIDYL_PROLINE_HYDROXYLATION
19	Up	0.053620837	0.29441325	GO_REGULATION_OF_NITRIC_OXIDE_SYNTHASE_BIOSYNTHETIC_PROCESS
28	Down	0.053701029	0.294591232	GO_UDP_GALACTOSYLTRANSFERASE_ACTIVITY
62	Down	0.053882734	0.295052707	GO_ENDOPLASMIC_RETICULUM_GOLGI_INTERMEDIATE_COMPARTMENT_MEMBRANE
33	Up	0.053906397	0.295052707	GO_EMBRYONIC_EYE_MORPHOGENESIS
48	Down	0.053928706	0.295052707	GO_RESPONSE_TO_GLUCAGON
51	Up	0.054263372	0.296620527	GO_ARTERY_MORPHOGENESIS
25	Up	0.054423087	0.297230076	GO_INFLAMMATORY_RESPONSE_TO_ANTIGENIC_STIMULUS
30	Up	0.054500603	0.297390015	GO_LAMININ_BINDING
1387	Down	0.054824538	0.298893107	GO_NEUROGENESIS
273	Down	0.054894864	0.299012129	GO_PHOSPHATASE_ACTIVITY
18	Up	0.055097632	0.29945901	GO_OXIDOREDUCTASE_ACTIVITY_OXIDIZING_METAL_IONS
19	Up	0.055152644	0.29945901	GO_CONNEXON_COMPLEX
105	Up	0.055163573	0.29945901	GO_INTEGRIN_BINDING
74	Up	0.05517117	0.29945901	GO_PLATELET_ALPHA_GRANULE
32	Down	0.055388639	0.300245976	GO_PHOSPHATIDIC_ACID_METABOLIC_PROCESS
25	Down	0.055422322	0.300245976	GO_ANTEROGRADE_AXONAL_TRANSPORT
49	Down	0.055503791	0.300245976	GO_GOLGI_ASSOCIATED_VESICLE_MEMBRANE
24	Up	0.055510933	0.300245976	GO_DETECTION_OF_BIOTIC_STIMULUS
45	Down	0.055670452	0.30084488	GO_CEREBELLAR_CORTEX_DEVELOPMENT
23	Down	0.055750482	0.301013546	GO_PROTEIN_DISULFIDE_OXIDOREDUCTASE_ACTIVITY
12	Down	0.055931353	0.301498344	GO_NUCLEOSIDE_TRANSMEMBRANE_TRANSPORT
284	Down	0.055989677	0.301498344	GO_DEPHOSPHORYLATION
87	Down	0.056031823	0.301498344	GO_COATED_MEMBRANE
198	Down	0.056035858	0.301498344	GO_UBIQUITIN_LIKE_PROTEIN_LIGASE_ACTIVITY
131	Up	0.056128101	0.301552886	GO_ADAPTIVE_IMMUNE_RESPONSE_BASED_ON_SOMATIC_RECOMBINATION_OF_IMMUNE_RECEPTORS_BUILT_FROM_IMMUNOGLOBULIN_SUPERFAMILY_DOMAINS
275	Down	0.056143807	0.301552886	GO_VESICLE_ORGANIZATION
15	Up	0.056371416	0.302357237	GO_ARACHIDONIC_ACID_MONOOXYGENASE_ACTIVITY
31	Up	0.056409281	0.302357237	GO_REGULATION_OF_VASCULAR_ENDOTHELIAL_GROWTH_FACTOR_PRODUCTION
15	Down	0.056485957	0.302357237	GO_INSULIN_LIKE_GROWTH_FACTOR_RECEPTOR_BINDING
217	Down	0.056489708	0.302357237	GO_REGULATION_OF_MITOCHONDRION_ORGANIZATION
48	Down	0.056614794	0.30276394	GO_OXIDOREDUCTASE_ACTIVITY_ACTING_ON_A_SULFUR_GROUP_OF_DONORS
204	Down	0.056774805	0.303356542	GO_CYTOSOLIC_PART
44	Up	0.056898498	0.303754233	GO_NEGATIVE_REGULATION_OF_TUMOR_NECROSIS_FACTOR_SUPERFAMILY_CYTOKINE_PRODUCTION
18	Down	0.057068569	0.304398611	GO_REGULATION_OF_CARDIAC_MUSCLE_CELL_DIFFERENTIATION
16	Down	0.057334676	0.305553682	GO_POSITIVE_REGULATION_OF_LAMELLIPODIUM_ASSEMBLY
32	Down	0.0574495	0.305690184	GO_NEGATIVE_REGULATION_OF_POTASSIUM_ION_TRANSPORT
12	Down	0.057459443	0.305690184	GO_ADENYLATE_CYCLASE_ACTIVATING_DOPAMINE_RECEPTOR_SIGNALING_PATHWAY
23	Up	0.057546919	0.30589164	GO_NEGATIVE_REGULATION_OF_PEPTIDYL_SERINE_PHOSPHORYLATION
59	Up	0.057623668	0.306035776	GO_VASCULOGENESIS
32	Up	0.058145673	0.30786168	GO_CENTROSOME_DUPLICATION
24	Down	0.058167184	0.30786168	GO_VIRAL_BUDDING
24	Down	0.058167184	0.30786168	GO_MULTI_ORGANISM_ORGANELLE_ORGANIZATION
24	Down	0.058167184	0.30786168	GO_MULTI_ORGANISM_MEMBRANE_BUDDING
16	Down	0.058283211	0.308161636	GO_STRIATUM_DEVELOPMENT
39	Down	0.058323813	0.308161636	GO_COCHLEA_DEVELOPMENT
206	Up	0.058672441	0.309696551	GO_PEPTIDASE_REGULATOR_ACTIVITY
23	Down	0.058714769	0.309696551	GO_PROTEIN_K63_LINKED_DEUBIQUITINATION
16	Down	0.058773283	0.309740225	GO_MISFOLDED_OR_INCOMPLETELY_SYNTHESIZED_PROTEIN_CATABOLIC_PROCESS
21	Down	0.058880917	0.31004247	GO_NCRNA_3_END_PROCESSING
21	Up	0.058973536	0.310205305	GO_REGULATION_OF_SUPEROXIDE_METABOLIC_PROCESS
36	Down	0.059012459	0.310205305	GO_BETA_TUBULIN_BINDING
72	Up	0.059066845	0.310226718	GO_REGULATION_OF_STEROID_METABOLIC_PROCESS
196	Down	0.05912112	0.310247511	GO_DNA_TEMPLATED_TRANSCRIPTION_INITIATION
18	Up	0.059370512	0.311073063	GO_NEGATIVE_REGULATION_OF_INTERLEUKIN_1_PRODUCTION
14	Up	0.059379338	0.311073063	GO_SPECIFIC_GRANULE
15	Up	0.059462989	0.31110267	GO_NEGATIVE_REGULATION_OF_CHEMOKINE_PRODUCTION
418	Down	0.059485898	0.31110267	GO_REGULATION_OF_TRANSMEMBRANE_TRANSPORT
7	Up	0.05961358	0.311506215	GO_IGG_BINDING
18	Up	0.059749637	0.311951394	GO_POSITIVE_REGULATION_OF_PROTEIN_DEACETYLATION
14	Up	0.059799959	0.311951394	GO_METALLOENDOPEPTIDASE_INHIBITOR_ACTIVITY
522	Down	0.059934023	0.312386465	GO_INORGANIC_CATION_TRANSMEMBRANE_TRANSPORTER_ACTIVITY
21	Up	0.060017051	0.312555012	GO_POSITIVE_T_CELL_SELECTION
19	Up	0.06006994	0.312566457	GO_SYNAPTONEMAL_COMPLEX_ORGANIZATION
29	Up	0.060238489	0.313164425	GO_EPIDERMIS_MORPHOGENESIS
105	Up	0.060286437	0.313164425	GO_TRANSCRIPTIONAL_REPRESSOR_ACTIVITY_RNA_POLYMERASE_II_CORE_PROMOTER_PROXIMAL_REGION_SEQUENCE_SPECIFIC_BINDING
28	Up	0.060401877	0.313373756	GO_T_CELL_MEDIATED_IMMUNITY
73	Down	0.060454511	0.313373756	GO_CELLULAR_RESPONSE_TO_KETONE
99	Up	0.060479204	0.313373756	GO_KERATINOCYTE_DIFFERENTIATION
347	Down	0.060653898	0.313786214	GO_GLYCOPROTEIN_METABOLIC_PROCESS
28	Down	0.060713092	0.313786214	GO_MUSCLE_HYPERTROPHY
20	Up	0.060742632	0.313786214	GO_NECROPTOTIC_PROCESS
14	Down	0.060762364	0.313786214	GO_THIOESTERASE_BINDING
11	Down	0.060864326	0.313787151	GO_CELLULAR_PIGMENT_ACCUMULATION
11	Down	0.060864326	0.313787151	GO_PIGMENT_ACCUMULATION
86	Up	0.060924775	0.313836392	GO_GOLGI_LUMEN
276	Down	0.061016742	0.314047773	GO_INTRINSIC_COMPONENT_OF_ORGANELLE_MEMBRANE
106	Down	0.061106163	0.314245707	GO_NEGATIVE_REGULATION_OF_PROTEIN_COMPLEX_ASSEMBLY
15	Down	0.061437746	0.315253761	GO_3_5_CYCLIC_AMP_PHOSPHODIESTERASE_ACTIVITY
208	Up	0.061439288	0.315253761	GO_LYMPHOCYTE_DIFFERENTIATION
24	Down	0.061455566	0.315253761	GO_SNORNA_BINDING
16	Down	0.061584107	0.31527163	GO_PHOSPHATIDYLINOSITOL_PHOSPHATE_KINASE_ACTIVITY
19	Up	0.061636496	0.31527163	GO_CENTRIOLE_ASSEMBLY
17	Up	0.061669734	0.31527163	GO_BLOOD_COAGULATION_INTRINSIC_PATHWAY
37	Down	0.061670672	0.31527163	GO_MATING
43	Down	0.061714703	0.31527163	GO_LIGASE_ACTIVITY_FORMING_CARBON_OXYGEN_BONDS
14	Down	0.061829983	0.315552474	GO_TOOTH_MINERALIZATION
29	Down	0.061872031	0.315552474	GO_PHOSPHOLIPID_CATABOLIC_PROCESS
389	Down	0.06231766	0.316838938	GO_AUTOPHAGY
58	Up	0.062328188	0.316838938	GO_REGULATION_OF_EPITHELIAL_CELL_APOPTOTIC_PROCESS
55	Up	0.062399925	0.316838938	GO_EPIDERMAL_GROWTH_FACTOR_RECEPTOR_SIGNALING_PATHWAY
160	Up	0.06242771	0.316838938	GO_CELLULAR_RESPONSE_TO_BIOTIC_STIMULUS
37	Up	0.062640227	0.316838938	GO_REGULATION_OF_STEROL_TRANSPORT
37	Up	0.062640227	0.316838938	GO_REGULATION_OF_CHOLESTEROL_TRANSPORT
21	Up	0.062662872	0.316838938	GO_ESTROGEN_METABOLIC_PROCESS
21	Up	0.062686035	0.316838938	GO_RESPONSE_TO_NITRIC_OXIDE
138	Up	0.062687473	0.316838938	GO_EPIDERMAL_CELL_DIFFERENTIATION
130	Up	0.062698418	0.316838938	GO_MOTOR_ACTIVITY
12	Up	0.062733673	0.316838938	GO_POSITIVE_REGULATION_OF_TRIGLYCERIDE_BIOSYNTHETIC_PROCESS
235	Down	0.062740892	0.316838938	GO_REGULATION_OF_CANONICAL_WNT_SIGNALING_PATHWAY
122	Down	0.062862379	0.31714331	GO_MULTICELLULAR_ORGANISMAL_SIGNALING
24	Down	0.062977937	0.31714331	GO_PIGMENT_GRANULE_LOCALIZATION
15	Up	0.062997214	0.31714331	GO_REGULATION_OF_CELL_PROLIFERATION_INVOLVED_IN_HEART_MORPHOGENESIS
67	Down	0.063049868	0.31714331	GO_REGULATION_OF_SISTER_CHROMATID_SEGREGATION
37	Up	0.063101785	0.31714331	GO_CYTOKINE_SECRETION
24	Up	0.063145872	0.31714331	GO_NEGATIVE_REGULATION_OF_MYOBLAST_DIFFERENTIATION
48	Up	0.063180352	0.31714331	GO_REGULATION_OF_MYOBLAST_DIFFERENTIATION
119	Down	0.063213479	0.31714331	GO_PROTEIN_PHOSPHATASE_BINDING
49	Up	0.063264073	0.31714331	GO_RESPONSE_TO_FUNGUS
14	Up	0.063367931	0.317405899	GO_REGULATION_OF_LIPOPROTEIN_LIPASE_ACTIVITY
162	Down	0.063534267	0.317770157	GO_POSITIVE_REGULATION_OF_CELL_MORPHOGENESIS_INVOLVED_IN_DIFFERENTIATION
20	Up	0.063543724	0.317770157	GO_POSITIVE_REGULATION_OF_EPIDERMAL_CELL_DIFFERENTIATION
15	Down	0.063710002	0.318045335	GO_SMN_SM_PROTEIN_COMPLEX
57	Up	0.063758245	0.318045335	GO_POSITIVE_REGULATION_OF_TUMOR_NECROSIS_FACTOR_SUPERFAMILY_CYTOKINE_PRODUCTION
139	Down	0.063759779	0.318045335	GO_PURINE_CONTAINING_COMPOUND_BIOSYNTHETIC_PROCESS
25	Down	0.063822666	0.318045335	GO_REGULATION_OF_ACTIVIN_RECEPTOR_SIGNALING_PATHWAY
121	Down	0.063869724	0.318045335	GO_UBIQUITIN_LIKE_PROTEIN_BINDING
21	Up	0.063908234	0.318045335	GO_REGULATION_OF_MEMBRANE_PROTEIN_ECTODOMAIN_PROTEOLYSIS
23	Down	0.06406653	0.318575985	GO_ACETYLCHOLINE_GATED_CHANNEL_COMPLEX
43	Down	0.064147104	0.318719614	GO_REGULATION_OF_MITOCHONDRIAL_OUTER_MEMBRANE_PERMEABILIZATION_INVOLVED_IN_APOPTOTIC_SIGNALING_PATHWAY
17	Down	0.064264321	0.318955345	GO_COPI_COATED_VESICLE_MEMBRANE
27	Down	0.064298004	0.318955345	GO_CALCIUM_DEPENDENT_CELL_CELL_ADHESION_VIA_PLASMA_MEMBRANE_CELL_ADHESION_MOLECULES
42	Up	0.064360714	0.319009775	GO_RESPONSE_TO_COLD
120	Up	0.064514538	0.319515374	GO_NEGATIVE_REGULATION_OF_IMMUNE_RESPONSE
587	Down	0.064675261	0.3198702	GO_CARBOHYDRATE_DERIVATIVE_BIOSYNTHETIC_PROCESS
124	Up	0.064689935	0.3198702	GO_KIDNEY_EPITHELIUM_DEVELOPMENT
115	Down	0.064744599	0.319883971	GO_REGULATION_OF_CALCIUM_ION_TRANSMEMBRANE_TRANSPORT
20	Up	0.064971451	0.320726632	GO_NEGATIVE_REGULATION_OF_CELL_CYCLE_ARREST
1205	Down	0.065019184	0.320726632	GO_PHOSPHORYLATION
29	Down	0.065143778	0.321084362	GO_REGULATION_OF_DEFENSE_RESPONSE_TO_VIRUS_BY_VIRUS
157	Up	0.065406505	0.322121811	GO_POSITIVE_REGULATION_OF_RESPONSE_TO_WOUNDING
19	Up	0.065507433	0.32232019	GO_REGULATION_OF_LYMPHOCYTE_CHEMOTAXIS
30	Down	0.065603515	0.32232019	GO_POSITIVE_REGULATION_OF_SMOOTH_MUSCLE_CONTRACTION
10	Up	0.065640351	0.32232019	GO_REGULATION_OF_SEQUESTERING_OF_TRIGLYCERIDE
28	Down	0.065698651	0.32232019	GO_NEUROPEPTIDE_RECEPTOR_BINDING
258	Down	0.065708154	0.32232019	GO_UBIQUITIN_LIKE_PROTEIN_LIGASE_BINDING
23	Down	0.065923144	0.322969009	GO_POSITIVE_REGULATION_OF_ERYTHROCYTE_DIFFERENTIATION
18	Up	0.06594518	0.322969009	GO_MICROVILLUS_MEMBRANE
14	Down	0.066072295	0.323334738	GO_CAMP_CATABOLIC_PROCESS
29	Down	0.066323638	0.324103434	GO_REGULATION_OF_VACUOLAR_TRANSPORT
11	Up	0.066380398	0.324103434	GO_PROSTATE_GLANDULAR_ACINUS_DEVELOPMENT
11	Down	0.06648655	0.324103434	GO_DIACYLGLYCEROL_BINDING
150	Up	0.066527754	0.324103434	GO_GASTRULATION
18	Up	0.06654583	0.324103434	GO_LYMPHOCYTE_APOPTOTIC_PROCESS
127	Down	0.066633136	0.324103434	GO_REGULATION_OF_ESTABLISHMENT_OF_PROTEIN_LOCALIZATION_TO_MITOCHONDRION
24	Down	0.06663645	0.324103434	GO_U12_TYPE_SPLICEOSOMAL_COMPLEX
105	Down	0.066649879	0.324103434	GO_AMINO_ACID_BINDING
19	Up	0.066727005	0.324222783	GO_STRUCTURAL_CONSTITUENT_OF_EYE_LENS
51	Down	0.066857217	0.324599685	GO_PROTEIN_MONOUBIQUITINATION
14	Down	0.067114263	0.325327183	GO_MEMBRANE_DEPOLARIZATION_DURING_CARDIAC_MUSCLE_CELL_ACTION_POTENTIAL
12	Down	0.067193515	0.325327183	GO_AXON_INITIAL_SEGMENT
21	Up	0.067219909	0.325327183	GO_ENDOCARDIAL_CUSHION_MORPHOGENESIS
32	Up	0.067228322	0.325327183	GO_SYNAPTONEMAL_COMPLEX
13	Up	0.067270866	0.325327183	GO_NEGATIVE_REGULATION_OF_EPIDERMAL_CELL_DIFFERENTIATION
44	Down	0.067366063	0.325532244	GO_POSITIVE_REGULATION_OF_TELOMERE_MAINTENANCE
204	Up	0.067458246	0.325555225	GO_GLYCOSAMINOGLYCAN_BINDING
577	Down	0.067476415	0.325555225	GO_INORGANIC_ION_TRANSMEMBRANE_TRANSPORT
14	Up	0.067531119	0.325564409	GO_POSITIVE_REGULATION_OF_P38MAPK_CASCADE
581	Down	0.067621915	0.325664755	GO_REGULATION_OF_ION_TRANSPORT
15	Down	0.067662198	0.325664755	GO_NEGATIVE_REGULATION_OF_PEPTIDYL_THREONINE_PHOSPHORYLATION
26	Up	0.067710382	0.325664755	GO_RNA_POLYMERASE_II_TRANSCRIPTION_COREPRESSOR_ACTIVITY
24	Up	0.067848533	0.326074867	GO_PEPTIDE_CATABOLIC_PROCESS
16	Up	0.068076246	0.326914433	GO_RNA_DESTABILIZATION
32	Up	0.068145435	0.326992025	GO_METANEPHRIC_NEPHRON_DEVELOPMENT
31	Up	0.068327521	0.327610803	GO_ENDOCARDIAL_CUSHION_DEVELOPMENT
11	Up	0.069193097	0.331503211	GO_LOOP_OF_HENLE_DEVELOPMENT
13	Up	0.069510345	0.332764585	GO_AMINO_SUGAR_CATABOLIC_PROCESS
95	Up	0.069615979	0.333011736	GO_MAINTENANCE_OF_LOCATION_IN_CELL
93	Up	0.069776657	0.333521602	GO_MULTICELLULAR_ORGANISM_METABOLIC_PROCESS
19	Up	0.069860779	0.333665035	GO_MUSCLE_CELL_CELLULAR_HOMEOSTASIS
467	Down	0.070032542	0.334027594	GO_POSITIVE_REGULATION_OF_CELL_DEVELOPMENT
232	Down	0.070045034	0.334027594	GO_TRANSFERASE_COMPLEX_TRANSFERRING_PHOSPHORUS_CONTAINING_GROUPS
18	Up	0.070100371	0.334033142	GO_GLOMERULAR_EPITHELIUM_DEVELOPMENT
15	Down	0.070310667	0.334776503	GO_ENDOPLASMIC_RETICULUM_SUBCOMPARTMENT
104	Up	0.070487312	0.335358616	GO_LIPID_HOMEOSTASIS
13	Down	0.070613875	0.335446944	GO_PROTEIN_PHOSPHATASE_TYPE_1_COMPLEX
12	Up	0.07063603	0.335446944	GO_REGULATION_OF_FEMALE_GONAD_DEVELOPMENT
12	Down	0.070669085	0.335446944	GO_POSITIVE_REGULATION_OF_CARDIAC_MUSCLE_CELL_DIFFERENTIATION
12	Up	0.070819715	0.335701992	GO_POSITIVE_REGULATION_OF_MACROPHAGE_ACTIVATION
140	Down	0.070860019	0.335701992	GO_NEGATIVE_REGULATION_OF_INTRACELLULAR_TRANSPORT
168	Up	0.070941604	0.335701992	GO_TRANSCRIPTIONAL_REPRESSOR_ACTIVITY_RNA_POLYMERASE_II_TRANSCRIPTION_REGULATORY_REGION_SEQUENCE_SPECIFIC_BINDING
253	Up	0.070987923	0.335701992	GO_LEUKOCYTE_CELL_CELL_ADHESION
43	Down	0.071169656	0.335701992	GO_TRNA_BINDING
27	Up	0.071210641	0.335701992	GO_FOLIC_ACID_CONTAINING_COMPOUND_METABOLIC_PROCESS
50	Down	0.071225952	0.335701992	GO_CARBOHYDRATE_DERIVATIVE_TRANSPORT
12	Down	0.071367945	0.335701992	GO_RESPONSE_TO_REDOX_STATE
39	Up	0.071510484	0.335701992	GO_GLANDULAR_EPITHELIAL_CELL_DIFFERENTIATION
25	Down	0.071553783	0.335701992	GO_POSITIVE_REGULATION_OF_BEHAVIOR
21	Up	0.071554041	0.335701992	GO_REGULATION_OF_CHROMATIN_SILENCING
30	Down	0.071639208	0.335701992	GO_RESPONSE_TO_AMPHETAMINE
45	Up	0.071659532	0.335701992	GO_DNA_METHYLATION
45	Up	0.071659532	0.335701992	GO_DNA_ALKYLATION
40	Down	0.071681804	0.335701992	GO_INTRA_GOLGI_VESICLE_MEDIATED_TRANSPORT
18	Up	0.071792438	0.335701992	GO_POSITIVE_REGULATION_OF_LIPID_STORAGE
13	Down	0.071801282	0.335701992	GO_POSITIVE_REGULATION_OF_OLIGODENDROCYTE_DIFFERENTIATION
28	Up	0.07182047	0.335701992	GO_INTRACELLULAR_LIGAND_GATED_ION_CHANNEL_ACTIVITY
32	Up	0.071875176	0.335701992	GO_SUPEROXIDE_METABOLIC_PROCESS
220	Up	0.071880479	0.335701992	GO_EXTERNAL_SIDE_OF_PLASMA_MEMBRANE
259	Down	0.071888073	0.335701992	GO_REGULATION_OF_HORMONE_SECRETION
12	Up	0.071920586	0.335701992	GO_INTERMEDIATE_FILAMENT_BINDING
28	Up	0.072098749	0.336279034	GO_AROMATIC_AMINO_ACID_FAMILY_METABOLIC_PROCESS
117	Down	0.072473528	0.337771561	GO_POTASSIUM_CHANNEL_ACTIVITY
11	Down	0.072692357	0.338535554	GO_POSITIVE_REGULATION_OF_PROTEIN_LOCALIZATION_TO_CELL_SURFACE
136	Down	0.073187825	0.34051585	GO_REGULATION_OF_ANION_TRANSPORT
40	Down	0.073228027	0.34051585	GO_AP_TYPE_MEMBRANE_COAT_ADAPTOR_COMPLEX
13	Down	0.073520758	0.341619436	GO_PROTEIN_NEDDYLATION
169	Down	0.073772816	0.342532519	GO_RECEPTOR_SIGNALING_PROTEIN_ACTIVITY
18	Down	0.073970572	0.343192286	GO_GABA_RECEPTOR_COMPLEX
136	Down	0.074078817	0.343264229	GO_RESPONSE_TO_ALKALOID
43	Up	0.074097419	0.343264229	GO_DYNEIN_COMPLEX
26	Down	0.074195238	0.343459339	GO_ACETYL_COA_METABOLIC_PROCESS
393	Up	0.074275341	0.343572208	GO_GLAND_DEVELOPMENT
54	Up	0.07441305	0.343736372	GO_CARDIAC_MUSCLE_TISSUE_MORPHOGENESIS
44	Up	0.074422325	0.343736372	GO_DETECTION_OF_CHEMICAL_STIMULUS_INVOLVED_IN_SENSORY_PERCEPTION_OF_TASTE
35	Up	0.07451892	0.343924896	GO_CELL_DIFFERENTIATION_INVOLVED_IN_KIDNEY_DEVELOPMENT
471	Up	0.07466292	0.344331761	GO_DEFENSE_RESPONSE_TO_OTHER_ORGANISM
203	Up	0.074887042	0.34510725	GO_CILIUM_MORPHOGENESIS
22	Down	0.07503237	0.345518741	GO_REGULATION_OF_CELLULAR_EXTRAVASATION
15	Up	0.075153437	0.34581798	GO_SERTOLI_CELL_DEVELOPMENT
11	Up	0.075325874	0.346150584	GO_NEGATIVE_REGULATION_OF_PROTEIN_ACTIVATION_CASCADE
50	Up	0.075337996	0.346150584	GO_RESPONSE_TO_PROGESTERONE
1764	Down	0.07549496	0.346613496	GO_CELL_PROJECTION
627	Down	0.075592301	0.346682937	GO_CELL_PART_MORPHOGENESIS
104	Up	0.075748715	0.346682937	GO_ODONTOGENESIS
83	Up	0.075802845	0.346682937	GO_EMBRYONIC_PLACENTA_DEVELOPMENT
161	Down	0.07582125	0.346682937	GO_PHOSPHATASE_BINDING
17	Up	0.075825354	0.346682937	GO_REGULATION_OF_ENERGY_HOMEOSTASIS
262	Up	0.075847435	0.346682937	GO_CARBOHYDRATE_BINDING
37	Down	0.075915867	0.346738694	GO_TRICARBOXYLIC_ACID_METABOLIC_PROCESS
11	Down	0.076275689	0.348124278	GO_ENDOPLASMIC_RETICULUM_TUBULAR_NETWORK
29	Up	0.076381381	0.348348813	GO_TELOMERIC_DNA_BINDING
12	Down	0.076491762	0.348594387	GO_DNA_LIGATION_INVOLVED_IN_DNA_REPAIR
120	Down	0.076610211	0.34887634	GO_GLYCOSYL_COMPOUND_BIOSYNTHETIC_PROCESS
11	Down	0.076873689	0.349817835	GO_REGULATION_OF_HEXOKINASE_ACTIVITY
85	Up	0.077026168	0.350253211	GO_POSITIVE_REGULATION_OF_CHROMATIN_MODIFICATION
61	Down	0.077290189	0.350735552	GO_KINASE_ACTIVATOR_ACTIVITY
77	Down	0.077331675	0.350735552	GO_RHO_GTPASE_BINDING
14	Down	0.077360221	0.350735552	GO_LONG_TERM_SYNAPTIC_DEPRESSION
11	Down	0.077424741	0.350735552	GO_ORGANELLE_INHERITANCE
40	Up	0.077491208	0.350735552	GO_RESPONSE_TO_CADMIUM_ION
29	Down	0.077495105	0.350735552	GO_REGULATION_OF_PROTEIN_TARGETING_TO_MEMBRANE
13	Down	0.077530418	0.350735552	GO_INTRINSIC_COMPONENT_OF_THE_CYTOPLASMIC_SIDE_OF_THE_PLASMA_MEMBRANE
58	Down	0.077785001	0.351476239	GO_PEPTIDE_SECRETION
12	Down	0.077918377	0.351476239	GO_CLATHRIN_COAT_OF_ENDOCYTIC_VESICLE
11	Up	0.077944566	0.351476239	GO_POSITIVE_REGULATION_OF_MYELINATION
16	Up	0.078005674	0.351476239	GO_POSITIVE_REGULATION_OF_ANTIGEN_PROCESSING_AND_PRESENTATION
29	Up	0.078025182	0.351476239	GO_REGULATION_OF_EXTRACELLULAR_MATRIX_ORGANIZATION
16	Down	0.078036161	0.351476239	GO_REGULATION_OF_ARF_PROTEIN_SIGNAL_TRANSDUCTION
33	Up	0.078210172	0.351850995	GO_G2_DNA_DAMAGE_CHECKPOINT
11	Down	0.078233492	0.351850995	GO_VIRAL_LATENCY
34	Down	0.078439466	0.352520226	GO_SCF_UBIQUITIN_LIGASE_COMPLEX
154	Down	0.078712998	0.353279577	GO_ISOMERASE_ACTIVITY
54	Up	0.07872302	0.353279577	GO_RESPONSE_TO_ZINC_ION
34	Up	0.078904288	0.353835518	GO_RESPONSE_TO_FLUID_SHEAR_STRESS
13	Up	0.079249715	0.355126266	GO_MITOTIC_CELL_CYCLE_ARREST
58	Down	0.079321907	0.355191633	GO_SMALL_NUCLEAR_RIBONUCLEOPROTEIN_COMPLEX
167	Down	0.079492146	0.355695624	GO_VACUOLE_ORGANIZATION
12	Up	0.079592157	0.355884872	GO_OXALATE_TRANSPORT
19	Down	0.079722343	0.356122722	GO_O_METHYLTRANSFERASE_ACTIVITY
20	Up	0.079760863	0.356122722	GO_TRIGLYCERIDE_LIPASE_ACTIVITY
44	Down	0.080043139	0.356994194	GO_POSITIVE_REGULATION_OF_MUSCLE_CONTRACTION
80	Down	0.080079058	0.356994194	GO_ADULT_LOCOMOTORY_BEHAVIOR
97	Up	0.080151065	0.356994194	GO_MODIFICATION_OF_MORPHOLOGY_OR_PHYSIOLOGY_OF_OTHER_ORGANISM
64	Down	0.080187635	0.356994194	GO_REGULATION_OF_BEHAVIOR
18	Up	0.080372304	0.357456919	GO_REGULATION_OF_TUMOR_NECROSIS_FACTOR_BIOSYNTHETIC_PROCESS
39	Up	0.080458634	0.357456919	GO_REGULATION_OF_LIPID_STORAGE
18	Down	0.080466476	0.357456919	GO_REGULATION_OF_DELAYED_RECTIFIER_POTASSIUM_CHANNEL_ACTIVITY
59	Up	0.080523461	0.357456919	GO_ORGANIC_HYDROXY_COMPOUND_TRANSMEMBRANE_TRANSPORTER_ACTIVITY
19	Down	0.080656076	0.357487303	GO_ERROR_FREE_TRANSLESION_SYNTHESIS
61	Up	0.080663517	0.357487303	GO_POSITIVE_REGULATION_OF_PRODUCTION_OF_MOLECULAR_MEDIATOR_OF_IMMUNE_RESPONSE
15	Up	0.08089078	0.357487303	GO_NEUROPILIN_BINDING
11	Down	0.080924147	0.357487303	GO_ENDOPLASMIC_RETICULUM_CHAPERONE_COMPLEX
28	Down	0.081005574	0.357487303	GO_RIBONUCLEOTIDE_CATABOLIC_PROCESS
45	Down	0.081134181	0.357487303	GO_NUCLEOID
14	Up	0.081160022	0.357487303	GO_NUCLEAR_MEMBRANE_PART
11	Down	0.081164151	0.357487303	GO_PROTEASOME_REGULATORY_PARTICLE_BASE_SUBCOMPLEX
52	Up	0.081166413	0.357487303	GO_RNA_POLYMERASE_II_CORE_PROMOTER_SEQUENCE_SPECIFIC_DNA_BINDING
45	Up	0.081209893	0.357487303	GO_THYMOCYTE_AGGREGATION
45	Up	0.081209893	0.357487303	GO_T_CELL_DIFFERENTIATION_IN_THYMUS
31	Up	0.081226032	0.357487303	GO_HYALURONAN_METABOLIC_PROCESS
36	Up	0.081297099	0.357544875	GO_HINDLIMB_MORPHOGENESIS
18	Up	0.081811648	0.359181003	GO_EPOXYGENASE_P450_PATHWAY
31	Up	0.08182121	0.359181003	GO_LIPOPOLYSACCHARIDE_MEDIATED_SIGNALING_PATHWAY
20	Up	0.081843871	0.359181003	GO_RESPONSE_TO_MUSCLE_ACTIVITY
39	Up	0.082296062	0.360759214	GO_REGULATION_OF_CELL_ADHESION_MEDIATED_BY_INTEGRIN
123	Up	0.082363776	0.360759214	GO_REGULATION_OF_ADAPTIVE_IMMUNE_RESPONSE
16	Up	0.082523576	0.360759214	GO_MODULATION_OF_GROWTH_OF_SYMBIONT_INVOLVED_IN_INTERACTION_WITH_HOST
15	Down	0.082523915	0.360759214	GO_PRIMARY_AMINO_COMPOUND_METABOLIC_PROCESS
11	Down	0.082606262	0.360759214	GO_NEGATIVE_REGULATION_OF_PATHWAY_RESTRICTED_SMAD_PROTEIN_PHOSPHORYLATION
13	Up	0.08264155	0.360759214	GO_COMPLEMENT_ACTIVATION_ALTERNATIVE_PATHWAY
185	Down	0.082732187	0.360759214	GO_VOLTAGE_GATED_ION_CHANNEL_ACTIVITY
23	Up	0.082789221	0.360759214	GO_POSITIVE_REGULATION_OF_MULTICELLULAR_ORGANISMAL_METABOLIC_PROCESS
23	Up	0.082789221	0.360759214	GO_POSITIVE_REGULATION_OF_COLLAGEN_METABOLIC_PROCESS
94	Down	0.08283659	0.360759214	GO_FILOPODIUM
320	Up	0.082847072	0.360759214	GO_NEGATIVE_REGULATION_OF_PROTEOLYSIS
34	Down	0.082954633	0.360972666	GO_FOREBRAIN_NEURON_DEVELOPMENT
84	Down	0.083063442	0.361191243	GO_PIGMENTATION
59	Down	0.083408464	0.362435935	GO_MYOSIN_BINDING
37	Down	0.083574406	0.362901258	GO_REGULATION_OF_PROTEIN_AUTOPHOSPHORYLATION
9	Up	0.083855071	0.363760836	GO_CREATINE_METABOLIC_PROCESS
61	Up	0.083890352	0.363760836	GO_DIGESTIVE_SYSTEM_PROCESS
17	Up	0.083985136	0.363845554	GO_BRANCH_ELONGATION_OF_AN_EPITHELIUM
11	Up	0.084047564	0.363845554	GO_OXIDOREDUCTASE_ACTIVITY_OXIDIZING_METAL_IONS_NAD_OR_NADP_AS_ACCEPTOR
26	Up	0.084108477	0.363845554	GO_OXIDOREDUCTASE_ACTIVITY_ACTING_ON_PAIRED_DONORS_WITH_INCORPORATION_OR_REDUCTION_OF_MOLECULAR_OXYGEN_REDUCED_FLAVIN_OR_FLAVOPROTEIN_AS_ONE_DONOR_AND_INCORPORATION_OF_ONE_ATOM_OF_OXYGEN
11	Up	0.084171669	0.363845554	GO_REGULATION_OF_VENTRICULAR_CARDIAC_MUSCLE_CELL_ACTION_POTENTIAL
451	Down	0.084205898	0.363845554	GO_REGULATION_OF_VESICLE_MEDIATED_TRANSPORT
13	Down	0.08426394	0.363845554	GO_RETROGRADE_TRANSPORT_ENDOSOME_TO_PLASMA_MEMBRANE
36	Up	0.084865591	0.366061799	GO_NEGATIVE_REGULATION_OF_LYMPHOCYTE_MEDIATED_IMMUNITY
16	Down	0.084895941	0.366061799	GO_POSITIVE_REGULATION_OF_TRANSCRIPTION_INITIATION_FROM_RNA_POLYMERASE_II_PROMOTER
81	Up	0.085322957	0.367383246	GO_METANEPHROS_DEVELOPMENT
39	Down	0.085328435	0.367383246	GO_NEGATIVE_REGULATION_OF_MITOCHONDRION_ORGANIZATION
10	Down	0.085381153	0.367383246	GO_CYTOSOLIC_PROTEASOME_COMPLEX
23	Down	0.08546483	0.367486847	GO_INNERVATION
20	Up	0.085570711	0.367685716	GO_AROMATIC_AMINO_ACID_FAMILY_CATABOLIC_PROCESS
14	Up	0.085723605	0.367845854	GO_HISTONE_H3_K9_MODIFICATION
15	Down	0.085727294	0.367845854	GO_NEGATIVE_REGULATION_OF_DENDRITE_MORPHOGENESIS
183	Up	0.085860292	0.368160334	GO_MESENCHYME_DEVELOPMENT
26	Down	0.085999619	0.368501496	GO_TRANSLATION_INITIATION_FACTOR_BINDING
58	Up	0.086296859	0.369518356	GO_POSITIVE_REGULATION_OF_CYTOKINE_BIOSYNTHETIC_PROCESS
20	Up	0.086368649	0.369569112	GO_SERTOLI_CELL_DIFFERENTIATION
399	Up	0.086448377	0.36965374	GO_MORPHOGENESIS_OF_AN_EPITHELIUM
36	Down	0.086571486	0.369855072	GO_OLFACTORY_LOBE_DEVELOPMENT
18	Up	0.086615427	0.369855072	GO_ENDONUCLEASE_ACTIVITY_ACTIVE_WITH_EITHER_RIBO_OR_DEOXYRIBONUCLEIC_ACIDS_AND_PRODUCING_3_PHOSPHOMONOESTERS
14	Down	0.086677115	0.369862346	GO_DETECTION_OF_CALCIUM_ION
76	Up	0.087133115	0.371315627	GO_B_CELL_MEDIATED_IMMUNITY
23	Down	0.087181262	0.371315627	GO_90S_PRERIBOSOME
22	Up	0.08719835	0.371315627	GO_TRANSFERASE_ACTIVITY_TRANSFERRING_NITROGENOUS_GROUPS
122	Up	0.087428591	0.371781298	GO_ENDOCRINE_SYSTEM_DEVELOPMENT
428	Down	0.087538035	0.371781298	GO_MONOVALENT_INORGANIC_CATION_TRANSPORT
14	Down	0.087757751	0.371781298	GO_DNA_HELICASE_COMPLEX
27	Up	0.087757905	0.371781298	GO_REGULATION_OF_KERATINOCYTE_DIFFERENTIATION
12	Up	0.087770674	0.371781298	GO_PEPTIDOGLYCAN_BINDING
1754	Down	0.087774307	0.371781298	GO_PROTEIN_LOCALIZATION
15	Up	0.08777972	0.371781298	GO_BLASTODERM_SEGMENTATION
340	Up	0.08779007	0.371781298	GO_ORGANONITROGEN_COMPOUND_CATABOLIC_PROCESS
1136	Down	0.087864241	0.37184002	GO_POSITIVE_REGULATION_OF_CELLULAR_COMPONENT_ORGANIZATION
36	Up	0.087968645	0.372026519	GO_T_CELL_SELECTION
247	Down	0.088055851	0.372031699	GO_VACUOLAR_TRANSPORT
22	Down	0.088090542	0.372031699	GO_ORGANOPHOSPHATE_ESTER_TRANSMEMBRANE_TRANSPORTER_ACTIVITY
531	Up	0.088168875	0.372099561	GO_TISSUE_MORPHOGENESIS
151	Down	0.088227304	0.372099561	GO_POTASSIUM_ION_TRANSPORT
71	Up	0.088332192	0.372287285	GO_SKIN_EPIDERMIS_DEVELOPMENT
143	Up	0.088420702	0.37240577	GO_MICROTUBULE_ORGANIZING_CENTER_PART
12	Up	0.088517972	0.372501852	GO_KERATAN_SULFATE_CATABOLIC_PROCESS
92	Up	0.08861347	0.372501852	GO_CYTOKINE_BINDING
90	Up	0.088673524	0.372501852	GO_CELLULAR_AMINO_ACID_BIOSYNTHETIC_PROCESS
101	Down	0.08874357	0.372501852	GO_REGULATION_OF_EXTENT_OF_CELL_GROWTH
265	Up	0.088785744	0.372501852	GO_CYTOKINE_RECEPTOR_BINDING
32	Up	0.088834616	0.372501852	GO_BLOOD_VESSEL_REMODELING
20	Up	0.0888664	0.372501852	GO_REGULATION_OF_CHOLESTEROL_EFFLUX
11	Up	0.089179298	0.373559478	GO_CITRULLINE_METABOLIC_PROCESS
49	Up	0.089612339	0.375118395	GO_STEROL_TRANSPORT
73	Down	0.089706482	0.375118395	GO_ERAD_PATHWAY
20	Down	0.089733966	0.375118395	GO_PRERIBOSOME_LARGE_SUBUNIT_PRECURSOR
72	Up	0.090157309	0.376632768	GO_SMOOTHENED_SIGNALING_PATHWAY
41	Down	0.090329182	0.376836224	GO_REGULATION_OF_DNA_DEPENDENT_DNA_REPLICATION
15	Up	0.090374165	0.376836224	GO_APICOLATERAL_PLASMA_MEMBRANE
90	Up	0.090389357	0.376836224	GO_HYDROLASE_ACTIVITY_HYDROLYZING_O_GLYCOSYL_COMPOUNDS
44	Up	0.090723337	0.377477071	GO_REGULATION_OF_INTERFERON_BETA_PRODUCTION
13	Up	0.090740995	0.377477071	GO_TELENCEPHALON_REGIONALIZATION
14	Up	0.090787949	0.377477071	GO_EXTRACELLULAR_NEGATIVE_REGULATION_OF_SIGNAL_TRANSDUCTION
14	Up	0.090787949	0.377477071	GO_EXTRACELLULAR_REGULATION_OF_SIGNAL_TRANSDUCTION
101	Up	0.0909072	0.377707076	GO_BRUSH_BORDER
14	Down	0.090965781	0.377707076	GO_EUKARYOTIC_TRANSLATION_INITIATION_FACTOR_3_COMPLEX
11	Down	0.091096037	0.377993383	GO_PHOSPHATASE_ACTIVATOR_ACTIVITY
402	Up	0.091224687	0.378272643	GO_EMBRYONIC_ORGAN_DEVELOPMENT
17	Down	0.091296996	0.378318064	GO_RETINOID_X_RECEPTOR_BINDING
226	Up	0.091422087	0.378581993	GO_CELL_FATE_COMMITMENT
231	Up	0.091554591	0.378690586	GO_REGULATION_OF_I_KAPPAB_KINASE_NF_KAPPAB_SIGNALING
276	Up	0.091571142	0.378690586	GO_EMBRYONIC_ORGAN_MORPHOGENESIS
186	Down	0.091701768	0.378839325	GO_NUCLEOSIDE_PHOSPHATE_BIOSYNTHETIC_PROCESS
24	Up	0.091782137	0.378839325	GO_REGULATION_OF_ODONTOGENESIS
67	Up	0.091791429	0.378839325	GO_NEURON_FATE_COMMITMENT
12	Down	0.092044296	0.37962885	GO_SEROTONIN_METABOLIC_PROCESS
42	Up	0.092156382	0.379837068	GO_NEGATIVE_REGULATION_OF_BMP_SIGNALING_PATHWAY
126	Down	0.092224443	0.379863672	GO_MULTI_ORGANISM_METABOLIC_PROCESS
47	Up	0.092512456	0.380795595	GO_COLUMNAR_CUBOIDAL_EPITHELIAL_CELL_DEVELOPMENT
138	Up	0.092859037	0.381967194	GO_PLACENTA_DEVELOPMENT
34	Down	0.093066263	0.382564384	GO_POSITIVE_REGULATION_OF_VASOCONSTRICTION
33	Up	0.093279704	0.383186313	GO_NEGATIVE_REGULATION_OF_INTERFERON_GAMMA_PRODUCTION
11	Up	0.093550436	0.383595746	GO_CD4_POSITIVE_OR_CD8_POSITIVE_ALPHA_BETA_T_CELL_LINEAGE_COMMITMENT
94	Down	0.093557055	0.383595746	GO_ACTION_POTENTIAL
25	Up	0.093566008	0.383595746	GO_CHOLESTEROL_EFFLUX
11	Up	0.093715147	0.38395189	GO_OXALATE_TRANSMEMBRANE_TRANSPORTER_ACTIVITY
258	Up	0.093984456	0.384779046	GO_ADAPTIVE_IMMUNE_RESPONSE
17	Down	0.094041846	0.384779046	GO_NEGATIVE_REGULATION_OF_RELEASE_OF_CYTOCHROME_C_FROM_MITOCHONDRIA
18	Down	0.094360906	0.385828478	GO_TRANSLATION_ELONGATION_FACTOR_ACTIVITY
97	Down	0.09449124	0.386105359	GO_UNFOLDED_PROTEIN_BINDING
402	Down	0.094726089	0.386808652	GO_POSITIVE_REGULATION_OF_CELLULAR_COMPONENT_BIOGENESIS
16	Down	0.094843043	0.387029914	GO_PRE_AUTOPHAGOSOMAL_STRUCTURE_MEMBRANE
19	Down	0.095016276	0.387480396	GO_PHOSPHATIDYLINOSITOL_3_KINASE_COMPLEX
12	Up	0.095111378	0.387611868	GO_REGULATION_OF_DENDRITIC_CELL_DIFFERENTIATION
616	Down	0.095174927	0.387614664	GO_CATION_TRANSMEMBRANE_TRANSPORTER_ACTIVITY
16	Down	0.095788813	0.38985595	GO_POSITIVE_REGULATION_OF_PHOSPHOPROTEIN_PHOSPHATASE_ACTIVITY
105	Up	0.095851706	0.38985595	GO_TRANSITION_METAL_ION_HOMEOSTASIS
61	Down	0.096634859	0.392782163	GO_REGULATION_OF_POTASSIUM_ION_TRANSMEMBRANE_TRANSPORT
364	Up	0.09683616	0.393341081	GO_NEGATIVE_REGULATION_OF_IMMUNE_SYSTEM_PROCESS
24	Down	0.096984315	0.393564135	GO_CEREBELLAR_PURKINJE_CELL_LAYER_DEVELOPMENT
11	Down	0.097018729	0.393564135	GO_WNT_SIGNALOSOME
19	Up	0.097084376	0.393571506	GO_POSITIVE_REGULATION_OF_PROTEIN_MATURATION
13	Up	0.097685667	0.395393672	GO_RETINOL_BINDING
530	Up	0.097689804	0.395393672	GO_EMBRYONIC_MORPHOGENESIS
28	Down	0.097726234	0.395393672	GO_MATURATION_OF_5_8S_RRNA
24	Down	0.09781642	0.395499046	GO_PROTEIN_PHOSPHORYLATED_AMINO_ACID_BINDING
39	Down	0.098473957	0.397896736	GO_POSITIVE_REGULATION_OF_SMALL_GTPASE_MEDIATED_SIGNAL_TRANSDUCTION
37	Up	0.098797698	0.39894342	GO_NEGATIVE_REGULATION_OF_ADAPTIVE_IMMUNE_RESPONSE
26	Down	0.098958664	0.399331885	GO_ZINC_II_ION_TRANSPORT
59	Down	0.099062249	0.399352447	GO_CATION_TRANSPORTING_ATPASE_ACTIVITY
15	Up	0.099093293	0.399352447	GO_STRIATED_MUSCLE_CELL_PROLIFERATION
165	Down	0.099207861	0.399510579	GO_REGULATION_OF_CELLULAR_KETONE_METABOLIC_PROCESS
21	Up	0.099291403	0.399510579	GO_L_ASCORBIC_ACID_BINDING
128	Down	0.099342767	0.399510579	GO_REGULATION_OF_CAMP_METABOLIC_PROCESS
28	Down	0.099425941	0.399510579	GO_NUCLEOTIDE_EXCISION_REPAIR_PREINCISION_COMPLEX_ASSEMBLY
308	Up	0.099609249	0.399510579	GO_REGIONALIZATION
1033	Down	0.099683065	0.399510579	GO_CARBOHYDRATE_DERIVATIVE_METABOLIC_PROCESS
13	Down	0.099703408	0.399510579	GO_DETECTION_OF_TEMPERATURE_STIMULUS_INVOLVED_IN_SENSORY_PERCEPTION_OF_PAIN
13	Down	0.099703408	0.399510579	GO_DETECTION_OF_TEMPERATURE_STIMULUS_INVOLVED_IN_SENSORY_PERCEPTION
79	Up	0.099715664	0.399510579	GO_CHROMATIN_DNA_BINDING
74	Up	0.099805514	0.39961091	GO_ODONTOGENESIS_OF_DENTIN_CONTAINING_TOOTH
101	Down	0.099917751	0.399800684	GO_REGULATION_OF_CIRCADIAN_RHYTHM
48	Up	0.100240974	0.400560345	GO_GLOMERULUS_DEVELOPMENT
19	Down	0.100300497	0.400560345	GO_PROTEIN_K48_LINKED_DEUBIQUITINATION
133	Up	0.100361694	0.400560345	GO_MESENCHYMAL_CELL_DIFFERENTIATION
27	Down	0.100488577	0.400560345	GO_POSITIVE_REGULATION_OF_INSULIN_SECRETION_INVOLVED_IN_CELLULAR_RESPONSE_TO_GLUCOSE_STIMULUS
29	Up	0.100539068	0.400560345	GO_NUCLEOSOMAL_DNA_BINDING
109	Up	0.100687935	0.400560345	GO_POSITIVE_REGULATION_OF_INFLAMMATORY_RESPONSE
176	Up	0.100754068	0.400560345	GO_ORGANIC_ANION_TRANSMEMBRANE_TRANSPORTER_ACTIVITY
18	Down	0.100839571	0.400560345	GO_CELLULAR_COMPONENT_MAINTENANCE
47	Up	0.100869137	0.400560345	GO_REGULATION_OF_IMMUNOGLOBULIN_PRODUCTION
48	Up	0.100901282	0.400560345	GO_REGULATION_OF_NF_KAPPAB_IMPORT_INTO_NUCLEUS
44	Up	0.100923561	0.400560345	GO_RESPONSE_TO_EXOGENOUS_DSRNA
16	Up	0.100924866	0.400560345	GO_BRANCHING_INVOLVED_IN_SALIVARY_GLAND_MORPHOGENESIS
110	Up	0.100952121	0.400560345	GO_MESODERM_DEVELOPMENT
97	Down	0.10105573	0.400713588	GO_REGULATION_OF_PROTEIN_TARGETING_TO_MITOCHONDRION
76	Up	0.101244723	0.401087229	GO_CELLULAR_TRANSITION_METAL_ION_HOMEOSTASIS
15	Up	0.101331887	0.401087229	GO_OXIDOREDUCTASE_ACTIVITY_ACTING_ON_THE_CH_NH2_GROUP_OF_DONORS_OXYGEN_AS_ACCEPTOR
14	Down	0.101376722	0.401087229	GO__DE_NOVO_POSTTRANSLATIONAL_PROTEIN_FOLDING
51	Up	0.101410151	0.401087229	GO_NEGATIVE_REGULATION_OF_I_KAPPAB_KINASE_NF_KAPPAB_SIGNALING
22	Up	0.101487179	0.40113458	GO_REGULATION_OF_T_CELL_CYTOKINE_PRODUCTION
45	Up	0.101569188	0.401201547	GO_POSITIVE_REGULATION_OF_INTERLEUKIN_8_PRODUCTION
42	Up	0.10168015	0.401229471	GO_EPITHELIAL_CELL_MORPHOGENESIS
11	Up	0.101841836	0.401229471	GO_BRANCHING_INVOLVED_IN_LABYRINTHINE_LAYER_MORPHOGENESIS
22	Up	0.101877945	0.401229471	GO_EMBRYONIC_PLACENTA_MORPHOGENESIS
36	Down	0.101901578	0.401229471	GO_POSITIVE_REGULATION_OF_MITOCHONDRIAL_OUTER_MEMBRANE_PERMEABILIZATION_INVOLVED_IN_APOPTOTIC_SIGNALING_PATHWAY
95	Down	0.101901614	0.401229471	GO_DNA_TEMPLATED_TRANSCRIPTION_TERMINATION
413	Up	0.101975615	0.401264607	GO_PATTERN_SPECIFICATION_PROCESS
19	Up	0.102452354	0.40262665	GO_KIDNEY_VASCULATURE_DEVELOPMENT
19	Up	0.102452354	0.40262665	GO_RENAL_SYSTEM_VASCULATURE_DEVELOPMENT
17	Down	0.10293322	0.4037531	GO_RETROGRADE_TRANSPORT_VESICLE_RECYCLING_WITHIN_GOLGI
62	Down	0.102935432	0.4037531	GO_PURINE_RIBONUCLEOSIDE_MONOPHOSPHATE_BIOSYNTHETIC_PROCESS
62	Down	0.102935432	0.4037531	GO_PURINE_NUCLEOSIDE_MONOPHOSPHATE_BIOSYNTHETIC_PROCESS
146	Up	0.103499071	0.405591134	GO_REGULATION_OF_CYTOKINE_SECRETION
19	Up	0.103535589	0.405591134	GO_REGULATION_OF_MYOBLAST_FUSION
28	Down	0.103603325	0.405598794	GO_POSITIVE_REGULATION_OF_PHOSPHATASE_ACTIVITY
48	Down	0.103935312	0.406565031	GO_MANGANESE_ION_BINDING
47	Down	0.103982007	0.406565031	GO_CHAPERONE_MEDIATED_PROTEIN_FOLDING
63	Up	0.104049617	0.40657157	GO_RNA_POLYMERASE_II_DISTAL_ENHANCER_SEQUENCE_SPECIFIC_DNA_BINDING
66	Down	0.104169747	0.406783192	GO_FOREBRAIN_GENERATION_OF_NEURONS
21	Down	0.104296847	0.407021747	GO_REGULATION_OF_TRANSLATIONAL_ELONGATION
39	Down	0.104435105	0.407125793	GO_MEMBRANE_DEPOLARIZATION_DURING_ACTION_POTENTIAL
50	Down	0.104455563	0.407125793	GO_NEURAL_RETINA_DEVELOPMENT
27	Down	0.104538689	0.407131599	GO_GLYOXYLATE_METABOLIC_PROCESS
45	Down	0.104627097	0.407131599	GO_VESICLE_COAT
688	Down	0.104657784	0.407131599	GO_CELLULAR_MACROMOLECULAR_COMPLEX_ASSEMBLY
31	Up	0.104721167	0.407131599	GO_STEROID_HYDROXYLASE_ACTIVITY
193	Up	0.105025412	0.408057147	GO_ANTERIOR_POSTERIOR_PATTERN_SPECIFICATION
13	Up	0.10509208	0.408059047	GO_MALE_SEX_DETERMINATION
43	Up	0.105257664	0.408444782	GO_1_PHOSPHATIDYLINOSITOL_3_KINASE_ACTIVITY
53	Up	0.105418508	0.408701053	GO_POSITIVE_REGULATION_OF_EXTRINSIC_APOPTOTIC_SIGNALING_PATHWAY
12	Up	0.105456272	0.408701053	GO_HEMATOPOIETIC_STEM_CELL_DIFFERENTIATION
19	Down	0.105570063	0.408885057	GO_PROTEIN_SERINE_THREONINE_KINASE_ACTIVATOR_ACTIVITY
110	Up	0.105680663	0.409056479	GO_VACUOLAR_LUMEN
93	Up	0.106220358	0.410718041	GO_EMBRYONIC_SKELETAL_SYSTEM_MORPHOGENESIS
30	Up	0.106243152	0.410718041	GO_POSITIVE_REGULATION_OF_SMOOTH_MUSCLE_CELL_MIGRATION
62	Up	0.106361949	0.410919659	GO_ACTOMYOSIN
78	Down	0.106455601	0.411023941	GO_HORMONE_TRANSPORT
11	Up	0.106571024	0.4112121	GO_PYRIMIDINE_RIBONUCLEOSIDE_CATABOLIC_PROCESS
11	Down	0.106933413	0.412352361	GO_CD40_RECEPTOR_COMPLEX
20	Down	0.107092908	0.412709293	GO_PHOSPHATIDYLINOSITOL_4_PHOSPHATE_BINDING
110	Up	0.10720714	0.412820306	GO_CARBOHYDRATE_CATABOLIC_PROCESS
16	Up	0.107306874	0.412820306	GO_INTERLEUKIN_1_RECEPTOR_BINDING
418	Down	0.107322567	0.412820306	GO_NEGATIVE_REGULATION_OF_PHOSPHORYLATION
11	Down	0.107440532	0.41301641	GO_ROUNDABOUT_SIGNALING_PATHWAY
39	Down	0.107649719	0.413562722	GO_SIGNAL_SEQUENCE_BINDING
136	Down	0.107729467	0.41361139	GO_HINDBRAIN_DEVELOPMENT
17	Down	0.107811546	0.413668945	GO_NEGATIVE_REGULATION_OF_PLATELET_ACTIVATION
32	Down	0.108203954	0.414916405	GO_ENDONUCLEASE_ACTIVITY_ACTIVE_WITH_EITHER_RIBO_OR_DEOXYRIBONUCLEIC_ACIDS_AND_PRODUCING_5_PHOSPHOMONOESTERS
36	Down	0.108319137	0.415099938	GO_CARBOXY_LYASE_ACTIVITY
34	Down	0.108394103	0.415104122	GO_ACETYLGALACTOSAMINYLTRANSFERASE_ACTIVITY
152	Down	0.108506268	0.415104122	GO_REGULATION_OF_ACTIN_FILAMENT_LENGTH
52	Up	0.108522193	0.415104122	GO_METALLOEXOPEPTIDASE_ACTIVITY
18	Up	0.108610384	0.415157103	GO_KIDNEY_MESENCHYME_DEVELOPMENT
14	Down	0.108670705	0.415157103	GO_REGULATION_OF_PROTEIN_LOCALIZATION_TO_CHROMOSOME_TELOMERIC_REGION
68	Up	0.108880535	0.415701163	GO_REGULATION_OF_ALPHA_BETA_T_CELL_ACTIVATION
108	Up	0.109095988	0.416266004	GO_MOTILE_CILIUM
19	Up	0.109321578	0.416644759	GO_REGULATION_OF_WATER_LOSS_VIA_SKIN
13	Up	0.109330396	0.416644759	GO_GANGLION_DEVELOPMENT
23	Up	0.110052908	0.418909359	GO_NEGATIVE_REGULATION_OF_ALPHA_BETA_T_CELL_ACTIVATION
13	Up	0.110127013	0.418909359	GO_SULFATE_TRANSMEMBRANE_TRANSPORTER_ACTIVITY
94	Down	0.110173151	0.418909359	GO_NEGATIVE_REGULATION_OF_INTRACELLULAR_PROTEIN_TRANSPORT
93	Down	0.110196396	0.418909359	GO_RIBONUCLEOPROTEIN_COMPLEX_BINDING
43	Up	0.110322873	0.419131753	GO_MORPHOGENESIS_OF_AN_EPITHELIAL_SHEET
173	Up	0.110707824	0.420335249	GO_GLIOGENESIS
14	Up	0.110942412	0.420684532	GO_RESPONSE_TO_POTASSIUM_ION
30	Down	0.110957435	0.420684532	GO_POSITIVE_REGULATION_OF_VIRAL_GENOME_REPLICATION
12	Up	0.111052691	0.420684532	GO_REGULATION_OF_CHEMOKINE_BIOSYNTHETIC_PROCESS
68	Up	0.111072724	0.420684532	GO_REGULATION_OF_CELL_JUNCTION_ASSEMBLY
12	Up	0.111169859	0.420768315	GO_REGULATION_OF_MACROPHAGE_CYTOKINE_PRODUCTION
30	Down	0.11125689	0.420768315	GO_ATPASE_REGULATOR_ACTIVITY
207	Down	0.111299566	0.420768315	GO_ANTIGEN_PROCESSING_AND_PRESENTATION
24	Down	0.111459136	0.421113378	GO_POSITIVE_REGULATION_OF_PROTEIN_COMPLEX_DISASSEMBLY
31	Up	0.111581696	0.421318272	GO_CELLULAR_RESPONSE_TO_GLUCOSE_STARVATION
47	Down	0.111664008	0.421371038	GO_POSITIVE_REGULATION_OF_NEURON_APOPTOTIC_PROCESS
810	Down	0.111810008	0.421663921	GO_ION_TRANSMEMBRANE_TRANSPORT
19	Up	0.111889206	0.421704673	GO_ENTEROENDOCRINE_CELL_DIFFERENTIATION
60	Down	0.112017898	0.421931802	GO_ER_ASSOCIATED_UBIQUITIN_DEPENDENT_PROTEIN_CATABOLIC_PROCESS
93	Up	0.112280645	0.422560677	GO_REGULATION_OF_INTERFERON_GAMMA_PRODUCTION
12	Up	0.112321918	0.422560677	GO_POSITIVE_REGULATION_OF_CAMP_MEDIATED_SIGNALING
18	Up	0.112483002	0.422881405	GO_EPITHELIAL_CILIUM_MOVEMENT
90	Down	0.112544338	0.422881405	GO_PHOSPHORIC_DIESTER_HYDROLASE_ACTIVITY
151	Up	0.113274179	0.425126223	GO_REGULATION_OF_CHROMATIN_ORGANIZATION
15	Up	0.113333422	0.425126223	GO_T_CELL_LINEAGE_COMMITMENT
37	Up	0.113348607	0.425126223	GO_REGULATION_OF_LYMPHOCYTE_MIGRATION
66	Up	0.113551708	0.425629076	GO_DEFENSE_RESPONSE_TO_GRAM_POSITIVE_BACTERIUM
55	Down	0.113715311	0.425946457	GO_INOSITOL_PHOSPHATE_METABOLIC_PROCESS
37	Up	0.113826757	0.425946457	GO_NEGATIVE_REGULATION_OF_EPITHELIAL_CELL_DIFFERENTIATION
698	Down	0.113857019	0.425946457	GO_HEAD_DEVELOPMENT
19	Up	0.114001702	0.425946457	GO_CALCIUM_DEPENDENT_CYSTEINE_TYPE_ENDOPEPTIDASE_ACTIVITY
140	Down	0.114065491	0.425946457	GO_POTASSIUM_ION_TRANSMEMBRANE_TRANSPORTER_ACTIVITY
1749	Down	0.114159661	0.425946457	GO_ORGANONITROGEN_COMPOUND_METABOLIC_PROCESS
13	Down	0.114189019	0.425946457	GO_PROTEIN_ALPHA_1_2_DEMANNOSYLATION
13	Down	0.114189019	0.425946457	GO_PROTEIN_DEMANNOSYLATION
25	Up	0.114380718	0.426403572	GO_REGULATION_OF_SYNCYTIUM_FORMATION_BY_PLASMA_MEMBRANE_FUSION
54	Down	0.114558557	0.426808497	GO_TRANSMISSION_OF_NERVE_IMPULSE
65	Down	0.114760595	0.427255101	GO_CELL_REDOX_HOMEOSTASIS
12	Up	0.114817013	0.427255101	GO_POSITIVE_REGULATION_OF_EXECUTION_PHASE_OF_APOPTOSIS
50	Up	0.115035112	0.427435747	GO_REGULATION_OF_ADHERENS_JUNCTION_ORGANIZATION
12	Down	0.115041637	0.427435747	GO_FATTY_ACID_TRANSPORTER_ACTIVITY
107	Up	0.115088942	0.427435747	GO_REGULATION_OF_CELL_CYCLE_ARREST
22	Up	0.115212165	0.427435747	GO_GLUCURONATE_METABOLIC_PROCESS
22	Up	0.115212165	0.427435747	GO_URONIC_ACID_METABOLIC_PROCESS
11	Down	0.115713855	0.428663265	GO_SNORNA_METABOLIC_PROCESS
10	Down	0.115750994	0.428663265	GO_AMINOACYL_TRNA_EDITING_ACTIVITY
11	Down	0.115751595	0.428663265	GO_IMMUNOLOGICAL_SYNAPSE_FORMATION
17	Up	0.115897361	0.428855442	GO_NEGATIVE_REGULATION_OF_STRIATED_MUSCLE_CELL_APOPTOTIC_PROCESS
147	Up	0.116081333	0.428855442	GO_REGULATION_OF_REACTIVE_OXYGEN_SPECIES_METABOLIC_PROCESS
147	Up	0.116104017	0.428855442	GO_RESPONSE_TO_TRANSITION_METAL_NANOPARTICLE
18	Up	0.116142532	0.428855442	GO_AMIDE_TRANSMEMBRANE_TRANSPORTER_ACTIVITY
139	Up	0.11616923	0.428855442	GO_REGULATION_OF_CELL_SHAPE
31	Down	0.116220798	0.428855442	GO_MULTI_ORGANISM_MEMBRANE_ORGANIZATION
13	Up	0.116380652	0.429188459	GO_TRANSEPITHELIAL_TRANSPORT
30	Down	0.116473386	0.4292737	GO_REPRODUCTIVE_BEHAVIOR
46	Down	0.116642825	0.429310985	GO_GUANOSINE_CONTAINING_COMPOUND_METABOLIC_PROCESS
19	Down	0.116724511	0.429310985	GO__DE_NOVO_PROTEIN_FOLDING
21	Down	0.116871995	0.429310985	GO_ANAPHASE_PROMOTING_COMPLEX
125	Up	0.116895788	0.429310985	GO_DIGESTION
199	Up	0.116917126	0.429310985	GO_SKELETAL_SYSTEM_MORPHOGENESIS
21	Down	0.116927537	0.429310985	GO_NUCLEOTIDE_EXCISION_REPAIR_DNA_DUPLEX_UNWINDING
151	Up	0.116970881	0.429310985	GO_ORGANIC_HYDROXY_COMPOUND_TRANSPORT
46	Down	0.117138055	0.429668796	GO_RIBOSOME_BINDING
125	Up	0.117405117	0.429969956	GO_SIGNAL_TRANSDUCTION_BY_P53_CLASS_MEDIATOR
19	Up	0.117416477	0.429969956	GO_NEURONAL_STEM_CELL_POPULATION_MAINTENANCE
82	Up	0.117429355	0.429969956	GO_TISSUE_MIGRATION
35	Down	0.117601212	0.430343663	GO_RESPONSE_TO_MONOAMINE
787	Down	0.117757726	0.430660817	GO_CATION_TRANSPORT
45	Up	0.118096058	0.431642142	GO_ALPHA_BETA_T_CELL_DIFFERENTIATION
15	Up	0.118323733	0.432218089	GO_ANTIGEN_PROCESSING_AND_PRESENTATION_VIA_MHC_CLASS_IB
15	Up	0.118443889	0.432400839	GO_T_CELL_APOPTOTIC_PROCESS
58	Down	0.118611636	0.43275701	GO_POSITIVE_REGULATION_OF_DNA_BIOSYNTHETIC_PROCESS
11	Down	0.118771506	0.433084038	GO_ESCRT_III_COMPLEX
11	Up	0.11913207	0.433598508	GO_VENTRICULAR_TRABECULA_MYOCARDIUM_MORPHOGENESIS
20	Down	0.119159091	0.433598508	GO_POSITIVE_REGULATION_OF_MUSCLE_HYPERTROPHY
20	Down	0.119159091	0.433598508	GO_POSITIVE_REGULATION_OF_CARDIAC_MUSCLE_HYPERTROPHY
26	Up	0.119223253	0.433598508	GO_INTESTINAL_ABSORPTION
933	Up	0.119300936	0.433598508	GO_EPITHELIUM_DEVELOPMENT
28	Down	0.119334523	0.433598508	GO_POSITIVE_REGULATION_OF_RELEASE_OF_CYTOCHROME_C_FROM_MITOCHONDRIA
89	Up	0.119469034	0.43373308	GO_TRANSCRIPTION_FACTOR_ACTIVITY_RNA_POLYMERASE_II_DISTAL_ENHANCER_SEQUENCE_SPECIFIC_BINDING
361	Down	0.119616979	0.43373308	GO_MONOVALENT_INORGANIC_CATION_TRANSMEMBRANE_TRANSPORTER_ACTIVITY
13	Up	0.119641793	0.43373308	GO_REGULATION_OF_HISTONE_PHOSPHORYLATION
12	Down	0.11965293	0.43373308	GO_ETHER_METABOLIC_PROCESS
487	Up	0.119839507	0.434154171	GO_EPITHELIAL_CELL_DIFFERENTIATION
82	Up	0.120139993	0.434987198	GO_NEGATIVE_REGULATION_OF_LEUKOCYTE_DIFFERENTIATION
34	Down	0.120363389	0.435154298	GO_MEDIATOR_COMPLEX
29	Down	0.120373516	0.435154298	GO_PHOSPHATE_TRANSMEMBRANE_TRANSPORTER_ACTIVITY
24	Up	0.120397865	0.435154298	GO_ATPASE_COMPLEX
22	Up	0.120551441	0.435454122	GO_PROTEIN_LOCALIZATION_TO_CELL_SURFACE
21	Up	0.12068933	0.435696961	GO_CHEMOKINE_BINDING
26	Up	0.120966903	0.435866493	GO_REGULATION_OF_TYPE_2_IMMUNE_RESPONSE
26	Up	0.121005497	0.435866493	GO_REGULATION_OF_MACROPHAGE_ACTIVATION
18	Down	0.121024607	0.435866493	GO_REGULATION_OF_UBIQUITIN_PROTEIN_LIGASE_ACTIVITY
82	Up	0.121191067	0.435866493	GO_HAIR_CYCLE
82	Up	0.121191067	0.435866493	GO_MOLTING_CYCLE
25	Down	0.121219173	0.435866493	GO_PHOSPHATIDYLINOSITOL_3_KINASE_SIGNALING
231	Up	0.121231112	0.435866493	GO_SULFUR_COMPOUND_BINDING
17	Up	0.121475529	0.43649074	GO_TOLL_LIKE_RECEPTOR_4_SIGNALING_PATHWAY
59	Down	0.121649962	0.436721293	GO_TRANSFERASE_ACTIVITY_TRANSFERRING_ALKYL_OR_ARYL_OTHER_THAN_METHYL_GROUPS
125	Up	0.121681346	0.436721293	GO_SARCOLEMMA
1321	Down	0.1220568	0.43781398	GO_SINGLE_ORGANISM_BIOSYNTHETIC_PROCESS
26	Up	0.12228033	0.438325721	GO_REGULATION_OF_P38MAPK_CASCADE
11	Down	0.122341642	0.438325721	GO_PALMITOYL_COA_HYDROLASE_ACTIVITY
29	Up	0.122445855	0.438421919	GO_POSITIVE_REGULATION_OF_NIK_NF_KAPPAB_SIGNALING
24	Down	0.122510699	0.438421919	GO_NUCLEOTIDE_KINASE_ACTIVITY
22	Up	0.122592238	0.438459245	GO_REGULATION_OF_T_HELPER_1_TYPE_IMMUNE_RESPONSE
16	Up	0.122881988	0.439240775	GO_MALE_GERM_CELL_NUCLEUS
201	Down	0.122993772	0.43938563	GO_ACTIVATION_OF_INNATE_IMMUNE_RESPONSE
131	Up	0.123304008	0.440051214	GO_CELL_MATURATION
994	Up	0.123322818	0.440051214	GO_SEQUENCE_SPECIFIC_DNA_BINDING
91	Up	0.123583494	0.440726331	GO_ENHANCER_BINDING
128	Up	0.123722259	0.440966156	GO_NEGATIVE_REGULATION_OF_CELLULAR_AMIDE_METABOLIC_PROCESS
799	Down	0.123901916	0.441246955	GO_RNA_PROCESSING
186	Up	0.123944166	0.441246955	GO_CILIUM_ORGANIZATION
13	Down	0.124317359	0.442294962	GO_REGULATION_OF_ACYL_COA_BIOSYNTHETIC_PROCESS
34	Up	0.124437738	0.442294962	GO_LUNG_EPITHELIUM_DEVELOPMENT
13	Up	0.12445374	0.442294962	GO_PENTOSE_METABOLIC_PROCESS
13	Up	0.124532016	0.44231821	GO_PHOSPHATIDYLETHANOLAMINE_BIOSYNTHETIC_PROCESS
18	Up	0.124811217	0.442930517	GO_SMOOTH_MUSCLE_TISSUE_DEVELOPMENT
54	Up	0.124848076	0.442930517	GO_BRUSH_BORDER_MEMBRANE
30	Down	0.125000366	0.443215787	GO_PROTEOGLYCAN_BINDING
180	Down	0.125156806	0.443515439	GO_ANTIGEN_RECEPTOR_MEDIATED_SIGNALING_PATHWAY
49	Up	0.12527198	0.443668599	GO_CARDIAC_SEPTUM_MORPHOGENESIS
68	Down	0.125430458	0.443701528	GO_MEMBRANE_DOCKING
18	Up	0.125471586	0.443701528	GO_METHIONINE_METABOLIC_PROCESS
54	Up	0.125497156	0.443701528	GO_VENTRICULAR_SEPTUM_DEVELOPMENT
42	Up	0.125964824	0.445099775	GO_REGULATION_OF_BONE_REMODELING
108	Down	0.12610264	0.445331545	GO_POSITIVE_REGULATION_OF_CYCLIC_NUCLEOTIDE_METABOLIC_PROCESS
40	Down	0.126176729	0.44533813	GO_MATURATION_OF_SSU_RRNA
13	Up	0.126420655	0.445775967	GO_CELLULAR_RESPONSE_TO_LIPOPROTEIN_PARTICLE_STIMULUS
65	Down	0.126481413	0.445775967	GO_REGULATION_OF_VASOCONSTRICTION
45	Down	0.126517668	0.445775967	GO_POTASSIUM_CHANNEL_REGULATOR_ACTIVITY
13	Down	0.126801434	0.446520641	GO_SUCKLING_BEHAVIOR
36	Up	0.1269505	0.446629027	GO_HEAD_MORPHOGENESIS
36	Down	0.127018803	0.446629027	GO_SYNAPTIC_TRANSMISSION_CHOLINERGIC
16	Up	0.127049516	0.446629027	GO_NEGATIVE_REGULATION_OF_EPIDERMIS_DEVELOPMENT
36	Up	0.127230659	0.446727834	GO_POSITIVE_REGULATION_OF_TYROSINE_PHOSPHORYLATION_OF_STAT3_PROTEIN
37	Up	0.127269289	0.446727834	GO_POSITIVE_REGULATION_OF_B_CELL_PROLIFERATION
127	Up	0.127301435	0.446727834	GO_HEPATICOBILIARY_SYSTEM_DEVELOPMENT
41	Down	0.127434274	0.446727834	GO_ANDROGEN_RECEPTOR_SIGNALING_PATHWAY
13	Down	0.127439873	0.446727834	GO_PSEUDOURIDINE_SYNTHASE_ACTIVITY
16	Down	0.127541628	0.4468305	GO_CYTOSKELETAL_ADAPTOR_ACTIVITY
22	Up	0.127682817	0.447071123	GO_ACROSOMAL_MEMBRANE
23	Up	0.127852776	0.447412155	GO_CYTOLYSIS
24	Up	0.128101344	0.447756718	GO_NEGATIVE_REGULATION_OF_VIRAL_TRANSCRIPTION
12	Up	0.128172899	0.447756718	GO_CELL_ADHESION_MEDIATED_BY_INTEGRIN
14	Down	0.128234553	0.447756718	GO_REGULATION_OF_SMOOTH_MUSCLE_CELL_APOPTOTIC_PROCESS
196	Down	0.128241707	0.447756718	GO_NEGATIVE_REGULATION_OF_WNT_SIGNALING_PATHWAY
30	Down	0.128434173	0.447987781	GO_NEUROTRANSMITTER_BINDING
11	Up	0.128543756	0.447987781	GO_BETA_2_MICROGLOBULIN_BINDING
477	Down	0.128563294	0.447987781	GO_SECRETION_BY_CELL
154	Down	0.128635554	0.447987781	GO_REGULATION_OF_CYCLIC_NUCLEOTIDE_METABOLIC_PROCESS
23	Down	0.128671158	0.447987781	GO_MITOCHONDRIAL_GENOME_MAINTENANCE
102	Down	0.128848331	0.448068754	GO_LATE_ENDOSOME_MEMBRANE
548	Up	0.128888483	0.448068754	GO_RESPONSE_TO_WOUNDING
11	Down	0.12892695	0.448068754	GO_EXIT_FROM_MITOSIS
322	Up	0.12905221	0.448068754	GO_TUBE_MORPHOGENESIS
29	Down	0.129078019	0.448068754	GO_QUINONE_METABOLIC_PROCESS
23	Down	0.129130421	0.448068754	GO_DETECTION_OF_MECHANICAL_STIMULUS_INVOLVED_IN_SENSORY_PERCEPTION
106	Down	0.129262962	0.44827639	GO_NUCLEAR_TRANSCRIBED_MRNA_CATABOLIC_PROCESS_NONSENSE_MEDIATED_DECAY
39	Down	0.129346016	0.448309435	GO_WNT_SIGNALING_PATHWAY_CALCIUM_MODULATING_PATHWAY
37	Down	0.129417904	0.448309435	GO_POSITIVE_REGULATION_OF_CALCIUM_MEDIATED_SIGNALING
92	Down	0.129703445	0.449046291	GO_MICROBODY_PART
1402	Down	0.129825171	0.449215491	GO_GOLGI_APPARATUS
929	Down	0.129920177	0.449292098	GO_REGULATION_OF_TRANSFERASE_ACTIVITY
11	Up	0.130047065	0.449478814	GO_POSITIVE_REGULATION_OF_CELL_FATE_COMMITMENT
43	Up	0.130125231	0.449497018	GO_NEGATIVE_REGULATION_OF_STEM_CELL_DIFFERENTIATION
18	Down	0.130356325	0.450043169	GO_NUCLEOTIDE_TRANSMEMBRANE_TRANSPORTER_ACTIVITY
1196	Down	0.130541203	0.450429244	GO_CELLULAR_MACROMOLECULE_LOCALIZATION
24	Up	0.130778516	0.450995712	GO_NEGATIVE_REGULATION_OF_SMOOTHENED_SIGNALING_PATHWAY
22	Down	0.131059016	0.451541232	GO_ACTIN_NUCLEATION
14	Up	0.131267921	0.451541232	GO_POSITIVE_REGULATION_OF_NITRIC_OXIDE_SYNTHASE_BIOSYNTHETIC_PROCESS
18	Up	0.131274038	0.451541232	GO_CELLULAR_SODIUM_ION_HOMEOSTASIS
1260	Down	0.131366966	0.451541232	GO_REGULATION_OF_CELLULAR_LOCALIZATION
441	Up	0.131463028	0.451541232	GO_CYTOKINE_MEDIATED_SIGNALING_PATHWAY
15	Up	0.131481582	0.451541232	GO_NEGATIVE_REGULATION_OF_CD4_POSITIVE_ALPHA_BETA_T_CELL_ACTIVATION
30	Down	0.131488036	0.451541232	GO_THYROID_HORMONE_RECEPTOR_BINDING
530	Down	0.131522552	0.451541232	GO_PROTEIN_LOCALIZATION_TO_ORGANELLE
71	Down	0.13160768	0.451582055	GO_ADHERENS_JUNCTION_ORGANIZATION
18	Up	0.13169397	0.451626817	GO_ORGAN_MATURATION
50	Up	0.131974282	0.452336533	GO_NEGATIVE_REGULATION_OF_T_CELL_PROLIFERATION
15	Down	0.132123569	0.452596625	GO_POSITIVE_REGULATION_OF_VIRAL_RELEASE_FROM_HOST_CELL
54	Down	0.132419494	0.452808434	GO_NEUROMUSCULAR_JUNCTION
93	Up	0.132508305	0.452808434	GO_ACTIN_FILAMENT_BASED_MOVEMENT
11	Up	0.132535012	0.452808434	GO_CYCLIC_NUCLEOTIDE_GATED_ION_CHANNEL_ACTIVITY
19	Down	0.132668734	0.452808434	GO_ADRENERGIC_RECEPTOR_BINDING
16	Down	0.132713752	0.452808434	GO_REGULATION_OF_CLATHRIN_MEDIATED_ENDOCYTOSIS
71	Up	0.132718258	0.452808434	GO_RESPONSE_TO_DSRNA
26	Up	0.132722608	0.452808434	GO_REGULATION_OF_MRNA_CATABOLIC_PROCESS
11	Up	0.132772891	0.452808434	GO_REGULATION_OF_PHOSPHOLIPASE_A2_ACTIVITY
52	Up	0.132924633	0.452899429	GO_REGULATION_OF_T_CELL_MEDIATED_IMMUNITY
13	Up	0.132946475	0.452899429	GO_REGULATION_OF_REGULATORY_T_CELL_DIFFERENTIATION
136	Down	0.133123872	0.453090846	GO_CELL_RECOGNITION
18	Up	0.133149629	0.453090846	GO_AMINO_ACID_BETAINE_METABOLIC_PROCESS
45	Down	0.133236825	0.453110079	GO_MUSCLE_FIBER_DEVELOPMENT
15	Up	0.133386321	0.453110079	GO_NEGATIVE_REGULATION_OF_ALPHA_BETA_T_CELL_DIFFERENTIATION
70	Up	0.133427107	0.453110079	GO_MONOSACCHARIDE_BINDING
51	Down	0.133452125	0.453110079	GO_NEUROMUSCULAR_PROCESS_CONTROLLING_BALANCE
28	Down	0.133522707	0.453110079	GO_NEURONAL_ACTION_POTENTIAL
24	Down	0.133887714	0.454098815	GO_ACETYLCHOLINE_BINDING
12	Up	0.134513704	0.455551216	GO_NEGATIVE_REGULATION_OF_CD4_POSITIVE_ALPHA_BETA_T_CELL_DIFFERENTIATION
44	Up	0.134560752	0.455551216	GO_NUCLEOSOME_BINDING
77	Down	0.134622425	0.455551216	GO_FC_GAMMA_RECEPTOR_SIGNALING_PATHWAY
11	Down	0.134650583	0.455551216	GO_IKAPPAB_KINASE_COMPLEX
123	Up	0.134735462	0.455551216	GO_T_CELL_DIFFERENTIATION
39	Down	0.134759231	0.455551216	GO_HINDBRAIN_MORPHOGENESIS
96	Up	0.135026148	0.456203414	GO_LYMPHOCYTE_ACTIVATION_INVOLVED_IN_IMMUNE_RESPONSE
153	Up	0.135318242	0.456939914	GO_REGULATION_OF_EXTRINSIC_APOPTOTIC_SIGNALING_PATHWAY
41	Up	0.135570055	0.457380287	GO_STRUCTURAL_CONSTITUENT_OF_MUSCLE
171	Down	0.13559701	0.457380287	GO_ANTIGEN_PROCESSING_AND_PRESENTATION_OF_PEPTIDE_ANTIGEN
42	Down	0.135824155	0.45776207	GO_REGULATION_OF_POLYSACCHARIDE_METABOLIC_PROCESS
22	Up	0.135858675	0.45776207	GO_ANION_ANION_ANTIPORTER_ACTIVITY
456	Up	0.136034061	0.458102688	GO_IMMUNE_EFFECTOR_PROCESS
31	Down	0.136365452	0.458507846	GO_MATURATION_OF_SSU_RRNA_FROM_TRICISTRONIC_RRNA_TRANSCRIPT_SSU_RRNA_5_8S_RRNA_LSU_RRNA_
14	Down	0.136404749	0.458507846	GO_VACUOLAR_PROTON_TRANSPORTING_V_TYPE_ATPASE_COMPLEX
26	Up	0.136447528	0.458507846	GO_REGULATION_OF_MESONEPHROS_DEVELOPMENT
40	Up	0.136451816	0.458507846	GO_MAMMARY_GLAND_MORPHOGENESIS
79	Up	0.136623587	0.458834986	GO_MULTICELLULAR_ORGANISMAL_MACROMOLECULE_METABOLIC_PROCESS
33	Down	0.136821947	0.459251022	GO_COP9_SIGNALOSOME
16	Down	0.137088579	0.459616976	GO_OMEGA_PEPTIDASE_ACTIVITY
13	Down	0.137169235	0.459616976	GO_NEGATIVE_REGULATION_OF_SYSTEMIC_ARTERIAL_BLOOD_PRESSURE
140	Up	0.137246894	0.459616976	GO_REGULATION_OF_RESPONSE_TO_CYTOKINE_STIMULUS
73	Up	0.13728354	0.459616976	GO_POSITIVE_REGULATION_OF_ADAPTIVE_IMMUNE_RESPONSE
30	Up	0.137353985	0.459616976	GO_FATTY_ACYL_COA_BINDING
22	Down	0.137430319	0.459616976	GO_POSITIVE_REGULATION_OF_CELLULAR_RESPONSE_TO_INSULIN_STIMULUS
12	Up	0.137452758	0.459616976	GO_BASIC_AMINO_ACID_TRANSPORT
12	Up	0.137709641	0.460159287	GO_GLYCEROL_TRANSPORT
10	Up	0.137764198	0.460159287	GO_REGULATION_OF_TRIGLYCERIDE_CATABOLIC_PROCESS
22	Down	0.137945536	0.460353525	GO_REGULATION_OF_MITOCHONDRIAL_MEMBRANE_PERMEABILITY_INVOLVED_IN_APOPTOTIC_PROCESS
37	Down	0.13797167	0.460353525	GO_CYTOSOLIC_SMALL_RIBOSOMAL_SUBUNIT
30	Up	0.138105188	0.460549805	GO_RESPONSE_TO_EPIDERMAL_GROWTH_FACTOR
23	Up	0.138225663	0.460605923	GO_RENAL_SYSTEM_PROCESS_INVOLVED_IN_REGULATION_OF_SYSTEMIC_ARTERIAL_BLOOD_PRESSURE
17	Up	0.138271418	0.460605923	GO_MATURE_B_CELL_DIFFERENTIATION
23	Up	0.138637918	0.461577431	GO_REGULATION_OF_HISTONE_DEACETYLATION
23	Down	0.138884156	0.46192892	GO_R_SMAD_BINDING
26	Up	0.138972118	0.46192892	GO_DEVELOPMENTAL_PROGRAMMED_CELL_DEATH
29	Down	0.138977004	0.46192892	GO_REGULATION_OF_OLIGODENDROCYTE_DIFFERENTIATION
1316	Down	0.139043152	0.46192892	GO_MOLECULAR_FUNCTION_REGULATOR
120	Down	0.139186005	0.46200204	GO_CELLULAR_RESPONSE_TO_TOPOLOGICALLY_INCORRECT_PROTEIN
86	Down	0.139258481	0.46200204	GO_POSITIVE_REGULATION_OF_DNA_REPLICATION
13	Up	0.139289944	0.46200204	GO_REGULATION_OF_CHOLESTEROL_STORAGE
13	Up	0.139509494	0.462481472	GO_NEGATIVE_REGULATION_OF_CARDIAC_MUSCLE_CELL_APOPTOTIC_PROCESS
30	Up	0.13972099	0.462933706	GO_POSITIVE_REGULATION_OF_INTERFERON_BETA_PRODUCTION
21	Up	0.140195402	0.464136334	GO_ALPHA_ACTININ_BINDING
150	Down	0.14023451	0.464136334	GO_TRANSCRIPTION_INITIATION_FROM_RNA_POLYMERASE_II_PROMOTER
114	Down	0.140379698	0.464367608	GO_CYTOSKELETON_DEPENDENT_INTRACELLULAR_TRANSPORT
34	Up	0.14082423	0.465338802	GO_NEGATIVE_REGULATION_OF_PROTEIN_PROCESSING
34	Up	0.14082423	0.465338802	GO_NEGATIVE_REGULATION_OF_PROTEIN_MATURATION
14	Up	0.14114869	0.466014304	GO_METANEPHRIC_MESENCHYME_DEVELOPMENT
74	Up	0.141179812	0.466014304	GO_REGULATION_OF_VIRAL_GENOME_REPLICATION
56	Up	0.141324126	0.46624107	GO_ENDOTHELIAL_CELL_MIGRATION
36	Up	0.141432149	0.466347931	GO_NEGATIVE_REGULATION_OF_MUSCLE_ORGAN_DEVELOPMENT
14	Up	0.141991642	0.467942526	GO_ENDOCARDIAL_CUSHION_FORMATION
32	Down	0.142269316	0.468607158	GO_GPI_ANCHOR_METABOLIC_PROCESS
78	Up	0.142401317	0.468625222	GO_CELLULAR_RESPONSE_TO_MECHANICAL_STIMULUS
16	Up	0.142426803	0.468625222	GO_ACYL_COA_DEHYDROGENASE_ACTIVITY
24	Down	0.142895339	0.469916086	GO_REGULATION_OF_TRANSFORMING_GROWTH_FACTOR_BETA_PRODUCTION
19	Down	0.143159727	0.470534584	GO_POLYPEPTIDE_N_ACETYLGALACTOSAMINYLTRANSFERASE_ACTIVITY
156	Up	0.143372967	0.470984398	GO_HEPARIN_BINDING
825	Down	0.143641358	0.471453263	GO_REGULATION_OF_CELL_DEVELOPMENT
23	Up	0.143668615	0.471453263	GO_NATURAL_KILLER_CELL_ACTIVATION_INVOLVED_IN_IMMUNE_RESPONSE
28	Down	0.143835902	0.471751155	GO_NEGATIVE_REGULATION_OF_NOTCH_SIGNALING_PATHWAY
56	Up	0.143923326	0.471786938	GO_OUTFLOW_TRACT_MORPHOGENESIS
14	Up	0.144498035	0.473419175	GO_BONE_MATURATION
123	Up	0.144595173	0.47348584	GO_LYMPHOCYTE_MEDIATED_IMMUNITY
16	Down	0.144782859	0.473848783	GO_NUCLEOSIDE_TRANSPORT
12	Down	0.144907043	0.473930058	GO_REGULATION_OF_RAC_PROTEIN_SIGNAL_TRANSDUCTION
23	Down	0.144961416	0.473930058	GO_CLATHRIN_VESICLE_COAT
20	Down	0.145171141	0.474364204	GO_DENDRITE_MEMBRANE
60	Down	0.145320698	0.474601389	GO_REGULATION_OF_PHOSPHOLIPID_METABOLIC_PROCESS
27	Down	0.145808727	0.475943151	GO_CLATHRIN_ADAPTOR_COMPLEX
11	Down	0.145986579	0.47627156	GO_REGULATION_OF_ER_TO_GOLGI_VESICLE_MEDIATED_TRANSPORT
20	Down	0.146157845	0.476359859	GO_SENSORY_PERCEPTION_OF_TEMPERATURE_STIMULUS
134	Up	0.146272197	0.476359859	GO_CLUSTER_OF_ACTIN_BASED_CELL_PROJECTIONS
100	Up	0.146412015	0.476359859	GO_NEGATIVE_REGULATION_OF_HOMOTYPIC_CELL_CELL_ADHESION
195	Up	0.146418465	0.476359859	GO_RESPIRATORY_SYSTEM_DEVELOPMENT
48	Up	0.146461297	0.476359859	GO_NEGATIVE_REGULATION_OF_COAGULATION
79	Down	0.14647718	0.476359859	GO_NEGATIVE_REGULATION_OF_PROTEIN_BINDING
35	Down	0.146783482	0.476810042	GO_VESICLE_DOCKING_INVOLVED_IN_EXOCYTOSIS
150	Down	0.146798492	0.476810042	GO_REGULATION_OF_CELL_PROJECTION_ASSEMBLY
22	Up	0.146847595	0.476810042	GO_CELLULAR_RESPONSE_TO_INTERLEUKIN_6
414	Down	0.1470514	0.47722049	GO_METAL_ION_TRANSMEMBRANE_TRANSPORTER_ACTIVITY
18	Up	0.147236529	0.477569931	GO_PHARYNGEAL_SYSTEM_DEVELOPMENT
113	Up	0.147632097	0.478280184	GO_REGULATION_OF_LYMPHOCYTE_MEDIATED_IMMUNITY
25	Up	0.147745693	0.478280184	GO_NEGATIVE_REGULATION_OF_CELL_CYCLE_G2_M_PHASE_TRANSITION
11	Up	0.147815591	0.478280184	GO_ANION_TRANSMEMBRANE_TRANSPORTING_ATPASE_ACTIVITY
77	Up	0.1478313	0.478280184	GO_REGULATION_OF_BMP_SIGNALING_PATHWAY
12	Up	0.147843339	0.478280184	GO_RESPONSE_TO_PHENYLPROPANOID
15	Up	0.148261948	0.47938289	GO_GAS_TRANSPORT
21	Down	0.148552589	0.480070893	GO_MACROMOLECULE_TRANSMEMBRANE_TRANSPORTER_ACTIVITY
23	Up	0.148744622	0.480286961	GO_LEUKOCYTE_APOPTOTIC_PROCESS
27	Up	0.148829724	0.480286961	GO_POSITIVE_REGULATION_OF_TRANSCRIPTION_FROM_RNA_POLYMERASE_II_PROMOTER_INVOLVED_IN_CELLULAR_RESPONSE_TO_CHEMICAL_STIMULUS
54	Up	0.148853127	0.480286961	GO_ALPHA_BETA_T_CELL_ACTIVATION
13	Up	0.149028307	0.480600702	GO_ALPHA_LINOLENIC_ACID_METABOLIC_PROCESS
16	Down	0.149364405	0.481121595	GO_CATECHOLAMINE_BINDING
27	Down	0.149411189	0.481121595	GO_PHAGOSOME_ACIDIFICATION
82	Up	0.149423914	0.481121595	GO_ODORANT_BINDING
19	Down	0.149518486	0.481174835	GO_MATURATION_OF_5_8S_RRNA_FROM_TRICISTRONIC_RRNA_TRANSCRIPT_SSU_RRNA_5_8S_RRNA_LSU_RRNA_
20	Up	0.150067922	0.482691083	GO_MIDDLE_EAR_MORPHOGENESIS
12	Up	0.150211617	0.482696978	GO_CHYLOMICRON
16	Down	0.150266641	0.482696978	GO_CLATHRIN_COAT_OF_COATED_PIT
16	Down	0.150304605	0.482696978	GO_CARDIAC_MYOFIBRIL_ASSEMBLY
29	Down	0.150682863	0.48295891	GO_CEREBELLAR_CORTEX_MORPHOGENESIS
21	Up	0.150948869	0.48295891	GO_LIPID_TRANSLOCATION
15	Up	0.151010131	0.48295891	GO_INORGANIC_ION_IMPORT_INTO_CELL
15	Up	0.151010131	0.48295891	GO_INORGANIC_CATION_IMPORT_INTO_CELL
52	Down	0.151142932	0.48295891	GO_NEGATIVE_REGULATION_OF_ERK1_AND_ERK2_CASCADE
30	Down	0.151202648	0.48295891	GO_PROTEIN_EXPORT_FROM_NUCLEUS
16	Up	0.151282241	0.48295891	GO_FOLIC_ACID_METABOLIC_PROCESS
33	Up	0.151368912	0.48295891	GO_A_BAND
509	Down	0.151529315	0.48295891	GO_CELLULAR_COMPONENT_DISASSEMBLY
23	Down	0.151559716	0.48295891	GO_POSITIVE_REGULATION_OF_PROTEIN_TARGETING_TO_MEMBRANE
53	Down	0.15156262	0.48295891	GO_LIGAND_DEPENDENT_NUCLEAR_RECEPTOR_TRANSCRIPTION_COACTIVATOR_ACTIVITY
13	Down	0.151664228	0.48295891	GO_CHAPERONE_MEDIATED_PROTEIN_COMPLEX_ASSEMBLY
452	Up	0.151722367	0.48295891	GO_SKELETAL_SYSTEM_DEVELOPMENT
14	Up	0.151830117	0.48295891	GO_REGULATION_OF_EXTRACELLULAR_MATRIX_DISASSEMBLY
23	Up	0.151832943	0.48295891	GO_EPITHELIAL_CELL_DIFFERENTIATION_INVOLVED_IN_KIDNEY_DEVELOPMENT
12	Up	0.151862856	0.48295891	GO_C_C_CHEMOKINE_RECEPTOR_ACTIVITY
16	Up	0.151909245	0.48295891	GO_EXTRACELLULAR_MATRIX_ASSEMBLY
206	Down	0.151944812	0.48295891	GO_REGULATION_OF_PEPTIDE_SECRETION
11	Up	0.152083045	0.48295891	GO_METANEPHRIC_RENAL_VESICLE_MORPHOGENESIS
19	Up	0.152197148	0.48295891	GO_REGULATION_OF_INTERFERON_ALPHA_PRODUCTION
115	Down	0.152218411	0.48295891	GO_PROTEIN_SECRETION
119	Down	0.152274984	0.48295891	GO_RNA_MODIFICATION
17	Down	0.152321946	0.48295891	GO_CAMP_BIOSYNTHETIC_PROCESS
20	Down	0.152347236	0.48295891	GO_NEGATIVE_REGULATION_OF_PROTEIN_LOCALIZATION_TO_CELL_PERIPHERY
20	Down	0.152347236	0.48295891	GO_NEGATIVE_REGULATION_OF_PROTEIN_LOCALIZATION_TO_PLASMA_MEMBRANE
276	Down	0.152422647	0.48295891	GO_VIRAL_LIFE_CYCLE
13	Up	0.15286269	0.484104441	GO_REGULATION_OF_ANTIGEN_PROCESSING_AND_PRESENTATION_OF_PEPTIDE_ANTIGEN
83	Down	0.153083899	0.48455612	GO_NUCLEOSIDE_MONOPHOSPHATE_BIOSYNTHETIC_PROCESS
65	Down	0.153219435	0.484598882	GO_CALCIUM_ION_IMPORT
113	Down	0.153254593	0.484598882	GO_PROTEIN_MODIFICATION_BY_SMALL_PROTEIN_REMOVAL
833	Up	0.153350522	0.484653674	GO_ORGAN_MORPHOGENESIS
207	Down	0.153453363	0.484730242	GO_REGULATION_OF_CATION_TRANSMEMBRANE_TRANSPORT
20	Down	0.153748447	0.485092317	GO_POSITIVE_REGULATION_OF_CIRCADIAN_RHYTHM
12	Up	0.153838359	0.485092317	GO_NEGATIVE_REGULATION_OF_NATURAL_KILLER_CELL_MEDIATED_IMMUNITY
12	Up	0.153838359	0.485092317	GO_NEGATIVE_REGULATION_OF_NATURAL_KILLER_CELL_MEDIATED_CYTOTOXICITY
502	Down	0.153882675	0.485092317	GO_PLASMA_MEMBRANE_PROTEIN_COMPLEX
147	Down	0.15442024	0.486299752	GO_PEPTIDYL_SERINE_MODIFICATION
71	Up	0.154423437	0.486299752	GO_REGULATION_OF_ACUTE_INFLAMMATORY_RESPONSE
590	Up	0.154717086	0.486826822	GO_DETECTION_OF_STIMULUS
189	Up	0.154748714	0.486826822	GO_STEM_CELL_DIFFERENTIATION
295	Down	0.154955043	0.487204336	GO_IMMUNE_RESPONSE_REGULATING_CELL_SURFACE_RECEPTOR_SIGNALING_PATHWAY
53	Down	0.155026744	0.487204336	GO_INTRAMOLECULAR_OXIDOREDUCTASE_ACTIVITY
12	Up	0.155456919	0.487741504	GO_PEPTIDYL_PROLINE_DIOXYGENASE_ACTIVITY
48	Down	0.155465445	0.487741504	GO_NUCLEOBASE_CONTAINING_COMPOUND_KINASE_ACTIVITY
109	Down	0.155507752	0.487741504	GO_NEGATIVE_REGULATION_OF_PROTEIN_CATABOLIC_PROCESS
12	Up	0.155642632	0.487741504	GO_REGULATION_OF_VITAMIN_METABOLIC_PROCESS
15	Up	0.155859183	0.487741504	GO_HYALURONAN_CATABOLIC_PROCESS
266	Up	0.155924886	0.487741504	GO_MULTICELLULAR_ORGANISMAL_HOMEOSTASIS
889	Down	0.155943299	0.487741504	GO_CELL_PROJECTION_ORGANIZATION
16	Down	0.156129271	0.487741504	GO_HISTONE_H2A_UBIQUITINATION
338	Up	0.156130314	0.487741504	GO_SECRETORY_GRANULE
43	Up	0.156154931	0.487741504	GO_STEROL_BINDING
29	Up	0.156164471	0.487741504	GO_T_CELL_DIFFERENTIATION_INVOLVED_IN_IMMUNE_RESPONSE
548	Down	0.156199919	0.487741504	GO_REGULATION_OF_CELL_MORPHOGENESIS
126	Down	0.156225992	0.487741504	GO_RECYCLING_ENDOSOME
32	Up	0.156467826	0.48788932	GO_POSITIVE_REGULATION_OF_EPIDERMIS_DEVELOPMENT
15	Down	0.156730639	0.48788932	GO_NEGATIVE_REGULATION_OF_MEGAKARYOCYTE_DIFFERENTIATION
30	Up	0.156776359	0.48788932	GO_ANDROGEN_METABOLIC_PROCESS
11	Up	0.156783139	0.48788932	GO_POSITIVE_REGULATION_OF_HORMONE_METABOLIC_PROCESS
887	Down	0.156833553	0.48788932	GO_MACROMOLECULE_CATABOLIC_PROCESS
26	Down	0.156847337	0.48788932	GO_RRNA_MODIFICATION
200	Up	0.156957715	0.48788932	GO_CARBOXYLIC_ACID_CATABOLIC_PROCESS
200	Up	0.156957715	0.48788932	GO_ORGANIC_ACID_CATABOLIC_PROCESS
30	Up	0.157049598	0.48788932	GO_NEGATIVE_REGULATION_OF_MUSCLE_CELL_APOPTOTIC_PROCESS
54	Up	0.157064596	0.48788932	GO_CELL_DIFFERENTIATION_IN_SPINAL_CORD
15	Up	0.157453817	0.488820182	GO_GLYCINE_METABOLIC_PROCESS
22	Up	0.157522819	0.488820182	GO_REGULATION_OF_SYSTEMIC_ARTERIAL_BLOOD_PRESSURE_BY_RENIN_ANGIOTENSIN
12	Up	0.157765161	0.489325948	GO_PARANODE_REGION_OF_AXON
132	Down	0.158138502	0.490010392	GO_MICROBODY
21	Down	0.158192158	0.490010392	GO_RETROMER_COMPLEX
88	Up	0.158224244	0.490010392	GO_LYSOSOMAL_LUMEN
66	Up	0.158559803	0.490520064	GO_RETINA_HOMEOSTASIS
18	Up	0.158581595	0.490520064	GO_POSITIVE_REGULATION_OF_MICROTUBULE_POLYMERIZATION
22	Up	0.158627474	0.490520064	GO_SEX_DETERMINATION
11	Up	0.158877422	0.490849903	GO_SCHMIDT_LANTERMAN_INCISURE
13	Down	0.158893352	0.490849903	GO_POSITIVE_REGULATION_OF_DNA_DAMAGE_RESPONSE_SIGNAL_TRANSDUCTION_BY_P53_CLASS_MEDIATOR
63	Up	0.159326307	0.491697332	GO_POSITIVE_REGULATION_OF_INTERFERON_GAMMA_PRODUCTION
32	Down	0.15932716	0.491697332	GO_MANNOSYLATION
17	Up	0.159600689	0.492295071	GO_MRNA_CLEAVAGE_FACTOR_COMPLEX
[truncated: 4,167 more rows]
